# Supplementary material for: ERVmap analysis reveals genome-wide transcription of human endogenous retroviruses
Source: PubMed Central journal article supplement — Proc Natl Acad Sci U S A. 2018 Nov 19;115(50):12565–72. doi: 10.1073/pnas.1814589115 (PMC6294949; doi:10.1073/pnas.1814589115), 2018-11-19
Supplement: pnas.1814589115.sd01.pdf [file pnas.1814589115.sd01.pdf]

Dataset S1: ERVmap database 2018

| chr | start    | end      | ID in the manuscript | Ref | additional names or overlapping ERVs | Refs for additional names |
|-----|----------|----------|----------------------|-----|--------------------------------------|---------------------------|
| 1   | 896177   | 898458   | 5803†                |     |                                      |                           |
| 1   | 1412252  | 1418852  | 5804†                |     |                                      |                           |
| 1   | 3801731  | 3806808  | 5807†                | 1   |                                      |                           |
| 1   | 4178469  | 4187573  | 5808†                | 1   |                                      |                           |
| 1   | 5044835  | 5052877  | 5811†                | 1   |                                      |                           |
| 1   | 5068433  | 5083121  | 5812†                | 1   |                                      |                           |
| 1   | 6560514  | 6570438  | 5814†                | 1   |                                      |                           |
| 1   | 8921235  | 8927121  | 5815†                | 1   |                                      |                           |
| 1   | 9086800  | 9096029  | 5816†                | 1   |                                      |                           |
| 1   | 12704129 | 12712798 | 5818†                | 1   |                                      |                           |
| 1   | 12780114 | 12785935 | K-31**               | 2   | K(1q43)                              | 3                         |
| 1   | 13352735 | 13362257 | K-32**               | 2   | K(OLDAL023753), K6,K76               | 3                         |
| 1   | 13559774 | 13567620 | 5829†                | 1   |                                      |                           |
| 1   | 16102814 | 16108812 | 5830†                | 1   |                                      |                           |
| 1   | 19267276 | 19283509 | 5833†                | 1   |                                      |                           |
| 1   | 19541549 | 19547611 | 5835†                | 1   |                                      |                           |
| 1   | 19926877 | 19932710 | 5836†                | 1   |                                      |                           |
| 1   | 19995861 | 20003699 | 5837†                | 1   |                                      |                           |
| 1   | 20029733 | 20034553 | 5839†                | 1   |                                      |                           |
| 1   | 20041473 | 20045694 | 5838†                | 1   |                                      |                           |
| 1   | 20153946 | 20160366 | 5840†                | 1   |                                      |                           |
| 1   | 21389829 | 21402141 | 5841†                | 1   |                                      |                           |
| 1   | 22997699 | 23004362 | 5842†                | 1   |                                      |                           |
| 1   | 25588008 | 25604799 | 5843†                | 1   |                                      |                           |
| 1   | 29795722 | 29801660 | 5846†                | 1   |                                      |                           |
| 1   | 30203678 | 30207868 | 5847†                | 1   |                                      |                           |
| 1   | 31457949 | 31467306 | 5848†                | 1   |                                      |                           |
| 1   | 32432558 | 32442460 | 5850†                | 1   |                                      |                           |
| 1   | 33063679 | 33071179 | 5852†                | 1   | K-84**                               | 2                         |
| 1   | 34630914 | 34637213 | 5855†                | 1   |                                      |                           |
| 1   | 35132758 | 35139235 | 5856†                | 1   |                                      |                           |
| 1   | 35141422 | 35146772 | 5858†                | 1   |                                      |                           |
| 1   | 36330038 | 36337263 | 5860†                | 1   |                                      |                           |
| 1   | 37907865 | 37914094 | 5861†                | 1   |                                      |                           |
| 1   | 38144395 | 38150922 | 5862†                | 1   |                                      |                           |
| 1   | 38425099 | 38430783 | 5863†                | 1   |                                      |                           |
| 1   | 41944843 | 41953816 | 5867†                | 1   | W-150†                               | 4                         |
| 1   | 43085575 | 43096756 | 5870†                | 1   |                                      |                           |
| 1   | 44050270 | 44062147 | 5871†                | 1   |                                      |                           |
| 1   | 45316434 | 45321282 | 5872†                | 1   |                                      |                           |
| 1   | 45753522 | 45762513 | 5874†                | 1   |                                      |                           |
| 1   | 46325548 | 46332308 | 5875†                | 1   |                                      |                           |
| 1   | 46380900 | 46391052 | 5876†                | 1   | ERVW-7                               | 4                         |
| 1   | 46902556 | 46907923 | 5878†                | 1   |                                      |                           |
| 1   | 46952611 | 46965485 | 5881†                | 1   | W-69†                                | 4                         |
| 1   | 48208956 | 48214821 | 5882†                | 1   |                                      |                           |
| 1   | 48437944 | 48446631 | 5883†                | 1   |                                      |                           |

|   |          |          |        |   |                             |     |
|---|----------|----------|--------|---|-----------------------------|-----|
| 1 | 48513245 | 48520256 | 5884‡  | 1 |                             |     |
| 1 | 51226974 | 51230497 | W-70†  | 4 |                             |     |
| 1 | 52217101 | 52225744 | 5889‡  | 1 |                             |     |
| 1 | 53424630 | 53432944 | 5890‡  | 1 | ERVH 1p32.3-2               | 5   |
| 1 | 53434942 | 53449829 | 5891‡  | 1 | ERVH 1p32.3-2               | 5   |
| 1 | 54630790 | 54639598 | 5892‡  | 1 |                             |     |
| 1 | 54893638 | 54903584 | 5894‡  | 1 |                             |     |
| 1 | 54907264 | 54918510 | 5893‡  | 1 | W-1†                        | 4   |
| 1 | 54955558 | 54963921 | 5896‡  | 1 |                             |     |
| 1 | 55021044 | 55033673 | 5895‡  | 1 |                             |     |
| 1 | 55728817 | 55738118 | 5897‡  | 1 |                             |     |
| 1 | 55781977 | 55788993 | 5898‡  | 1 | W-2†                        | 4   |
| 1 | 58169729 | 58174110 | 5901‡  | 1 |                             |     |
| 1 | 62178464 | 62183792 | 5903‡  | 1 |                             |     |
| 1 | 62753981 | 62762193 | 5904‡  | 1 |                             |     |
| 1 | 64186607 | 64192770 | 5906‡  | 1 |                             |     |
| 1 | 64349468 | 64356214 | 5907‡  | 1 |                             |     |
| 1 | 65637768 | 65648036 | 5909‡  | 1 |                             |     |
| 1 | 66417247 | 66425819 | 5913‡  | 1 |                             |     |
| 1 | 68386150 | 68395998 | 5917‡  | 1 | ERVH 1p31.3                 | 5   |
| 1 | 70366862 | 70372373 | 5918‡  | 1 |                             |     |
| 1 | 70588486 | 70594003 | 5919‡  | 1 |                             |     |
| 1 | 71502160 | 71510867 | 5921‡  | 1 |                             |     |
| 1 | 72536820 | 72543692 | 5922‡  | 1 |                             |     |
| 1 | 72980828 | 72983976 | 5925‡  | 1 |                             |     |
| 1 | 72984499 | 72993622 | 5924‡  | 1 |                             |     |
| 1 | 74740173 | 74745417 | 5929‡  | 1 |                             |     |
| 1 | 75377242 | 75387497 | 5931‡  | 1 | K-56**,<br>K4, K116, ERVK-1 | 2,3 |
| 1 | 76894794 | 76900406 | 5934‡  | 1 |                             |     |
| 1 | 78872187 | 78880915 | 5937‡  | 1 |                             |     |
| 1 | 79488621 | 79493869 | 5938‡  | 1 |                             |     |
| 1 | 79636722 | 79644493 | 5939‡  | 1 |                             |     |
| 1 | 79696347 | 79702067 | 5940‡  | 1 |                             |     |
| 1 | 81245283 | 81251445 | 5943‡  | 1 |                             |     |
| 1 | 82065186 | 82072875 | 5944‡  | 1 |                             |     |
| 1 | 82354311 | 82360556 | 5945‡  | 1 |                             |     |
| 1 | 82955305 | 82961581 | 5946‡  | 1 |                             |     |
| 1 | 84185857 | 84193548 | 5947‡  | 1 |                             |     |
| 1 | 86339777 | 86344673 | 5952‡  | 1 |                             |     |
| 1 | 86409350 | 86416680 | 5951‡  | 1 |                             |     |
| 1 | 86502069 | 86508345 | 5953‡  | 1 |                             |     |
| 1 | 86801833 | 86809633 | 5954‡  | 1 |                             |     |
| 1 | 88597916 | 88602972 | 5955‡  | 1 |                             |     |
| 1 | 88924528 | 88931881 | ERVW-8 | 4 |                             |     |
| 1 | 89087359 | 89088526 | 5959‡  | 1 |                             |     |
| 1 | 89337707 | 89345852 | 5961‡  | 1 |                             |     |
| 1 | 91179131 | 91181141 | W-71†  | 4 |                             |     |
| 1 | 91217603 | 91221324 | 5965‡  | 1 |                             |     |
| 1 | 91662451 | 91672448 | 5966‡  | 1 |                             |     |
| 1 | 93829913 | 93838086 | 5970‡  | 1 |                             |     |
| 1 | 94371747 | 94378713 | 5973‡  | 1 |                             |     |

|   |           |           |        |   |                             |     |
|---|-----------|-----------|--------|---|-----------------------------|-----|
| 1 | 94445506  | 94448856  | 5972‡  | 1 |                             |     |
| 1 | 94566485  | 94572689  | 5975‡  | 1 |                             |     |
| 1 | 95644482  | 95648284  | 5977‡  | 1 |                             |     |
| 1 | 96147729  | 96153745  | 5978‡  | 1 |                             |     |
| 1 | 98800062  | 98806877  | 5980‡  | 1 |                             |     |
| 1 | 99509511  | 99515369  | 5981‡  | 1 |                             |     |
| 1 | 101499079 | 101506294 | 5983‡  | 1 |                             |     |
| 1 | 101597412 | 101603403 | 5985‡  | 1 |                             |     |
| 1 | 102086135 | 102092888 | 5986‡  | 1 |                             |     |
| 1 | 102735637 | 102747998 | 5987‡  | 1 |                             |     |
| 1 | 102833368 | 102841125 | 5988‡  | 1 |                             |     |
| 1 | 103268225 | 103273353 | 5991‡  | 1 |                             |     |
| 1 | 103649080 | 103655071 | 5992‡  | 1 |                             |     |
| 1 | 103698053 | 103701660 | 5994‡  | 1 |                             |     |
| 1 | 103743218 | 103749209 | 5993‡  | 1 |                             |     |
| 1 | 104380123 | 104388639 | 5996‡  | 1 |                             |     |
| 1 | 104459780 | 104468289 | 5997‡  | 1 |                             |     |
| 1 | 104597438 | 104603785 | 5998‡  | 1 |                             |     |
| 1 | 105109274 | 105118215 | 5999‡  | 1 |                             |     |
| 1 | 108473135 | 108480383 | 6005‡  | 1 |                             |     |
| 1 | 109702615 | 109710648 | 6007‡  | 1 |                             |     |
| 1 | 109853286 | 109861439 | 6009‡  | 1 |                             |     |
| 1 | 111027890 | 111037387 | 6011‡  | 1 |                             |     |
| 1 | 112123455 | 112132620 | 6013‡  | 1 |                             |     |
| 1 | 112808821 | 112815357 | 6015‡  | 1 |                             |     |
| 1 | 112826178 | 112832724 | 6016‡  | 1 |                             |     |
| 1 | 114363331 | 114369602 | 6022‡  | 1 |                             |     |
| 1 | 115509135 | 115515373 | 6024‡  | 1 |                             |     |
| 1 | 116743298 | 116752070 | 6025‡  | 1 |                             |     |
| 1 | 116862581 | 116867559 | 6026‡  | 1 |                             |     |
| 1 | 117815373 | 117821863 | 6028‡  | 1 |                             |     |
| 1 | 118225659 | 118233123 | 6029‡  | 1 |                             |     |
| 1 | 119164450 | 119171266 | 6033‡  | 1 | W-3†                        | 4   |
| 1 | 119174039 | 119177639 | 6032‡  | 1 |                             |     |
| 1 | 119423404 | 119431645 | 6034‡  | 1 |                             |     |
| 1 | 119483760 | 119489557 | 6035‡  | 1 |                             |     |
| 1 | 121510068 | 121514123 | 6036‡  | 1 |                             |     |
| 1 | 143764840 | 143778331 | 6056‡  | 1 |                             |     |
| 1 | 150628159 | 150635776 | 6062‡  | 1 | K-80**, K(1q21.3)           | 2,3 |
| 1 | 150650452 | 150657785 | 6061‡  | 1 |                             |     |
| 1 | 154048082 | 154053911 | 6067‡  | 1 |                             |     |
| 1 | 154671475 | 154677936 | 6068‡  | 1 |                             |     |
| 1 | 155622389 | 155626664 | W-4†   | 4 |                             |     |
| 1 | 155626665 | 155635845 | K-10** | 2 | K102,K(C1b),<br>K50a,ERVK-7 | 3   |
| 1 | 155650288 | 155659631 | 6072‡  | 1 |                             |     |
| 1 | 155691829 | 155699522 | 6073‡  | 1 |                             |     |
| 1 | 156180078 | 156187897 | 6074‡  | 1 |                             |     |
| 1 | 157268909 | 157278348 | 6075‡  | 1 |                             |     |
| 1 | 157456947 | 157463367 | 6076‡  | 1 |                             |     |
| 1 | 158947555 | 158959388 | 6078‡  | 1 |                             |     |
| 1 | 160687621 | 160690643 | 6080‡  | 1 |                             |     |

|   |           |           |             |   |                             |   |
|---|-----------|-----------|-------------|---|-----------------------------|---|
| 1 | 160690784 | 160700016 | K-21**      | 2 | K(C1a),ERVK-18,<br>K110,K18 | 3 |
| 1 | 160716922 | 160725930 | 6081‡       | 1 |                             |   |
| 1 | 161250327 | 161257712 | 6083‡       | 1 |                             |   |
| 1 | 161404178 | 161410693 | 6084‡       | 1 |                             |   |
| 1 | 161472931 | 161480292 | 6085‡       | 1 |                             |   |
| 1 | 161480757 | 161486360 | 6086‡       | 1 |                             |   |
| 1 | 161486732 | 161495378 | 6087‡       | 1 |                             |   |
| 1 | 163591309 | 163597002 | 6088‡       | 1 |                             |   |
| 1 | 166605365 | 166611021 | K-66**      | 2 | K12                         | 3 |
| 1 | 167317844 | 167323390 | 6091‡       | 1 |                             |   |
| 1 | 167863091 | 167869903 | 6092‡       | 1 |                             |   |
| 1 | 169661628 | 169670891 | 6094‡       | 1 |                             |   |
| 1 | 169683482 | 169691301 | 6095‡       | 1 |                             |   |
| 1 | 171219225 | 171224440 | 6098‡       | 1 |                             |   |
| 1 | 171224951 | 171233473 | 6097‡       | 1 |                             |   |
| 1 | 171305046 | 171312905 | 6099‡       | 1 |                             |   |
| 1 | 172795697 | 172812639 | 6104‡       | 1 |                             |   |
| 1 | 173367995 | 173375971 | 6106‡       | 1 |                             |   |
| 1 | 173376648 | 173386043 | 6107‡       | 1 |                             |   |
| 1 | 173637224 | 173643032 | 6108‡       | 1 |                             |   |
| 1 | 173683960 | 173692052 | 6109‡       | 1 |                             |   |
| 1 | 175097959 | 175107407 | 6114‡       | 1 |                             |   |
| 1 | 175269399 | 175277561 | 6115‡       | 1 |                             |   |
| 1 | 176308346 | 176326337 | 6116‡       | 1 |                             |   |
| 1 | 178040363 | 178045925 | 6118‡       | 1 |                             |   |
| 1 | 178141217 | 178143059 | ERVW-9      | 4 |                             |   |
| 1 | 178553828 | 178560028 | 6119‡       | 1 |                             |   |
| 1 | 179437569 | 179443253 | 6120‡       | 1 |                             |   |
| 1 | 181246197 | 181255342 | 6122‡       | 1 |                             |   |
| 1 | 183613210 | 183622443 | 6123‡       | 1 | ERVH 1q25.3                 | 5 |
| 1 | 183700889 | 183709310 | 6124‡       | 1 |                             |   |
| 1 | 185578774 | 185596328 | 6125‡       | 1 |                             |   |
| 1 | 185947626 | 185954216 | 6126‡       | 1 |                             |   |
| 1 | 186512486 | 186523752 | 6127‡       | 1 |                             |   |
| 1 | 186914433 | 186922867 | 6128‡       | 1 |                             |   |
| 1 | 187630702 | 187639303 | 6129‡       | 1 |                             |   |
| 1 | 187641226 | 187643860 | ERVMER61-1  | 6 |                             |   |
| 1 | 187763316 | 187770890 | 6132‡       | 1 |                             |   |
| 1 | 188254253 | 188261096 | 6136‡       | 1 |                             |   |
| 1 | 188335033 | 188341843 | 6135‡       | 1 |                             |   |
| 1 | 188664057 | 188672609 | 6139‡       | 1 |                             |   |
| 1 | 191234158 | 191240730 | 6143‡       | 1 |                             |   |
| 1 | 193375077 | 193383555 | 6144‡       | 1 |                             |   |
| 1 | 194423737 | 194427274 | 6145‡       | 1 |                             |   |
| 1 | 195135209 | 195144760 | 6146‡       | 1 |                             |   |
| 1 | 195732186 | 195738786 | 6148‡       | 1 |                             |   |
| 1 | 195847914 | 195848597 | ERVH 1q31.3 | 5 |                             |   |
| 1 | 196870350 | 196875321 | 6152‡       | 1 |                             |   |
| 1 | 198034651 | 198042126 | 6155‡       | 1 |                             |   |
| 1 | 199091140 | 199097994 | 6157‡       | 1 |                             |   |
| 1 | 205859304 | 205864229 | 6164‡       | 1 |                             |   |
| 1 | 205866331 | 205875807 | ERVW-10     | 4 |                             |   |

|   |           |           |             |   |                   |     |
|---|-----------|-----------|-------------|---|-------------------|-----|
| 1 | 205884553 | 205890432 | 6166‡       | 1 |                   |     |
| 1 | 205890691 | 205905299 | 6165‡       | 1 |                   |     |
| 1 | 206052702 | 206058912 | 6169‡       | 1 |                   |     |
| 1 | 207632285 | 207641252 | 6171‡       | 1 | K-79**, K(1q32.2) | 2,3 |
| 1 | 209448805 | 209455626 | 6174‡       | 1 |                   |     |
| 1 | 210111089 | 210116207 | 6176‡       | 1 |                   |     |
| 1 | 210187604 | 210195678 | 6177‡       | 1 |                   |     |
| 1 | 211224278 | 211229655 | 6180‡       | 1 |                   |     |
| 1 | 211687139 | 211694456 | 6181‡       | 1 |                   |     |
| 1 | 211855797 | 211858921 | W-5†        | 4 |                   |     |
| 1 | 212423060 | 212428615 | 6183‡       | 1 |                   |     |
| 1 | 212907313 | 212919912 | 6184‡       | 1 |                   |     |
| 1 | 213025527 | 213032448 | 6185‡       | 1 |                   |     |
| 1 | 215409813 | 215415700 | 6187‡       | 1 |                   |     |
| 1 | 216008129 | 216014110 | 6188‡       | 1 |                   |     |
| 1 | 216145057 | 216150415 | 6189‡       | 1 |                   |     |
| 1 | 217306165 | 217316008 | 6191‡       | 1 |                   |     |
| 1 | 218595010 | 218599849 | 6192‡       | 1 |                   |     |
| 1 | 218748957 | 218755271 | 6193‡       | 1 |                   |     |
| 1 | 221947781 | 221958635 | 6195‡       | 1 |                   |     |
| 1 | 221965965 | 221971618 | 6196‡       | 1 |                   |     |
| 1 | 223022050 | 223030156 | 6199‡       | 1 |                   |     |
| 1 | 224839928 | 224846082 | 6203‡       | 1 |                   |     |
| 1 | 224885687 | 224893544 | 6202‡       | 1 |                   |     |
| 1 | 225221769 | 225229271 | 6205‡       | 1 |                   |     |
| 1 | 225791235 | 225801134 | 6206‡       | 1 |                   |     |
| 1 | 226536208 | 226541736 | 6207‡       | 1 |                   |     |
| 1 | 226833700 | 226838425 | 6208‡       | 1 |                   |     |
| 1 | 227501595 | 227505575 | 6209‡       | 1 |                   |     |
| 1 | 227589718 | 227596629 | 6211‡       | 1 |                   |     |
| 1 | 227618386 | 227631143 | 6212‡       | 1 | ERVW-11           | 4   |
| 1 | 228676128 | 228682649 | 6214‡       | 1 |                   |     |
| 1 | 228947563 | 228951891 | 6215‡       | 1 |                   |     |
| 1 | 229173971 | 229180173 | 6217‡       | 1 |                   |     |
| 1 | 229412496 | 229420609 | 6218‡       | 1 |                   |     |
| 1 | 229824326 | 229833252 | 6219‡       | 1 |                   |     |
| 1 | 230601216 | 230609194 | ERVH 1q42.2 | 5 |                   |     |
| 1 | 232118115 | 232125541 | 6223‡       | 1 |                   |     |
| 1 | 232195768 | 232201038 | 6225‡       | 1 |                   |     |
| 1 | 232229606 | 232234799 | 6224‡       | 1 |                   |     |
| 1 | 233681188 | 233689204 | 6226‡       | 1 |                   |     |
| 1 | 235670261 | 235675550 | 6228‡       | 1 |                   |     |
| 1 | 236926867 | 236938803 | 6229‡       | 1 |                   |     |
| 1 | 237916849 | 237921655 | 6230‡       | 1 |                   |     |
| 1 | 238762294 | 238764473 | K-34**      | 2 | K(4p16.3b)        | 3   |
| 1 | 239101392 | 239109170 | 6231‡       | 1 |                   |     |
| 1 | 241433880 | 241439886 | 6234‡       | 1 |                   |     |
| 1 | 242212993 | 242217888 | 6238‡       | 1 |                   |     |
| 1 | 242456969 | 242459573 | 6239‡       | 1 |                   |     |
| 1 | 246527504 | 246535272 | 6244‡       | 1 |                   |     |
| 1 | 246634727 | 246642803 | 6245‡       | 1 |                   |     |
| 1 | 247024661 | 247030174 | 6248‡       | 1 |                   |     |
| 1 | 247106816 | 247111558 | 6249‡       | 1 |                   |     |

|   |           |           |       |   |         |   |
|---|-----------|-----------|-------|---|---------|---|
| 1 | 247286262 | 247291931 | 6251‡ | 1 |         |   |
| 1 | 247354310 | 247363372 | 6253‡ | 1 |         |   |
| 1 | 247704462 | 247710150 | 6254‡ | 1 |         |   |
| 1 | 247898556 | 247905892 | 6255‡ | 1 |         |   |
| 1 | 248335769 | 248340991 | 6259‡ | 1 |         |   |
| 2 | 153015    | 160785    | 460‡  | 1 | W-6†    | 4 |
| 2 | 3814215   | 3821340   | 461‡  | 1 |         |   |
| 2 | 4058380   | 4064382   | 463‡  | 1 |         |   |
| 2 | 4484110   | 4490493   | 464‡  | 1 |         |   |
| 2 | 5000768   | 5008271   | 465‡  | 1 |         |   |
| 2 | 6838342   | 6846883   | 466‡  | 1 |         |   |
| 2 | 7872704   | 7878891   | 467‡  | 1 |         |   |
| 2 | 8893542   | 8903195   | 468‡  | 1 |         |   |
| 2 | 12569897  | 12574343  | 470‡  | 1 |         |   |
| 2 | 12626292  | 12631024  | 471‡  | 1 |         |   |
| 2 | 13163758  | 13169724  | 472‡  | 1 |         |   |
| 2 | 13525956  | 13533240  | 475‡  | 1 |         |   |
| 2 | 13921743  | 13929192  | 478‡  | 1 |         |   |
| 2 | 16788313  | 16798199  | 483‡  | 1 |         |   |
| 2 | 17341052  | 17349678  | 485‡  | 1 | W-72†   | 4 |
| 2 | 18081089  | 18088339  | 486‡  | 1 |         |   |
| 2 | 19922747  | 19929801  | 490‡  | 1 |         |   |
| 2 | 20081139  | 20087278  | 491‡  | 1 |         |   |
| 2 | 26297921  | 26306401  | 493‡  | 1 |         |   |
| 2 | 30515952  | 30520264  | W-73† | 4 |         |   |
| 2 | 31629153  | 31634158  | W-74† | 4 |         |   |
| 2 | 31687629  | 31695250  | 496‡  | 1 |         |   |
| 2 | 33051996  | 33055372  | 500‡  | 1 |         |   |
| 2 | 33657072  | 33665918  | 501‡  | 1 | W-75†   | 4 |
| 2 | 33914037  | 33919525  | 502‡  | 1 |         |   |
| 2 | 34694639  | 34702829  | 504‡  | 1 |         |   |
| 2 | 34789819  | 34796914  | 506‡  | 1 |         |   |
| 2 | 34800998  | 34806725  | 505‡  | 1 |         |   |
| 2 | 35434618  | 35443665  | 507‡  | 1 |         |   |
| 2 | 35812296  | 35817902  | 508‡  | 1 |         |   |
| 2 | 36599100  | 36608515  | 509‡  | 1 |         |   |
| 2 | 37124923  | 37137627  | 510‡  | 1 |         |   |
| 2 | 37382173  | 37386696  | 511‡  | 1 |         |   |
| 2 | 38080800  | 38086512  | 513‡  | 1 |         |   |
| 2 | 40671993  | 40679001  | 517‡  | 1 |         |   |
| 2 | 41377833  | 41385713  | 519‡  | 1 |         |   |
| 2 | 41493320  | 41502500  | 521‡  | 1 |         |   |
| 2 | 44016096  | 44024710  | 524‡  | 1 |         |   |
| 2 | 45034042  | 45040148  | 525‡  | 1 |         |   |
| 2 | 47100196  | 47108458  | 526‡  | 1 |         |   |
| 2 | 47582986  | 47591646  | 528‡  | 1 |         |   |
| 2 | 48384541  | 48390655  | 530‡  | 1 |         |   |
| 2 | 52023103  | 52027674  | 534‡  | 1 |         |   |
| 2 | 52430939  | 52437869  | 535‡  | 1 |         |   |
| 2 | 53755319  | 53760155  | 536‡  | 1 | ERVW-12 | 4 |
| 2 | 56719153  | 56724484  | 540‡  | 1 |         |   |
| 2 | 56982217  | 56985262  | 542‡  | 1 |         |   |
| 2 | 57192995  | 57200209  | 544‡  | 1 |         |   |

|   |           |           |       |   |           |   |
|---|-----------|-----------|-------|---|-----------|---|
| 2 | 57227380  | 57235200  | 543‡  | 1 |           |   |
| 2 | 58113432  | 58119130  | 546‡  | 1 |           |   |
| 2 | 58314210  | 58322389  | 547‡  | 1 |           |   |
| 2 | 60417619  | 60424938  | 549‡  | 1 |           |   |
| 2 | 62088710  | 62100497  | 550‡  | 1 |           |   |
| 2 | 63322227  | 63329541  | 552‡  | 1 |           |   |
| 2 | 63988512  | 63996440  | 555‡  | 1 |           |   |
| 2 | 64073267  | 64080444  | 557‡  | 1 |           |   |
| 2 | 64252675  | 64258565  | 558‡  | 1 |           |   |
| 2 | 64886312  | 64899831  | 559‡  | 1 |           |   |
| 2 | 66243885  | 66249526  | 560‡  | 1 |           |   |
| 2 | 67330959  | 67339594  | 562‡  | 1 |           |   |
| 2 | 69789472  | 69799355  | 565‡  | 1 |           |   |
| 2 | 70620648  | 70625536  | 566‡  | 1 |           |   |
| 2 | 71020906  | 71024472  | 568‡  | 1 |           |   |
| 2 | 71046742  | 71050606  | 567‡  | 1 |           |   |
| 2 | 71157776  | 71165609  | 569‡  | 1 |           |   |
| 2 | 71388088  | 71395557  | 570‡  | 1 |           |   |
| 2 | 73627645  | 73640017  | 572‡  | 1 |           |   |
| 2 | 73687664  | 73699895  | 574‡  | 1 |           |   |
| 2 | 75210983  | 75219555  | 576‡  | 1 |           |   |
| 2 | 75871689  | 75879498  | W-76† | 4 |           |   |
| 2 | 76573619  | 76579713  | 580‡  | 1 | ERVH 2p12 | 5 |
| 2 | 77088082  | 77093190  | 582‡  | 1 |           |   |
| 2 | 77831426  | 77836423  | 583‡  | 1 |           |   |
| 2 | 77965122  | 77971357  | 584‡  | 1 |           |   |
| 2 | 78758343  | 78764250  | 585‡  | 1 |           |   |
| 2 | 79051369  | 79057086  | 586‡  | 1 |           |   |
| 2 | 79092033  | 79099634  | 587‡  | 1 |           |   |
| 2 | 79163170  | 79170353  | W-7†  | 4 |           |   |
| 2 | 79211349  | 79217561  | 588‡  | 1 |           |   |
| 2 | 80173919  | 80182405  | 589‡  | 1 |           |   |
| 2 | 80875808  | 80879920  | 591‡  | 1 |           |   |
| 2 | 81036257  | 81043919  | 592‡  | 1 |           |   |
| 2 | 81650079  | 81658404  | 593‡  | 1 |           |   |
| 2 | 82022841  | 82031067  | 594‡  | 1 |           |   |
| 2 | 83787145  | 83794480  | 596‡  | 1 |           |   |
| 2 | 83873933  | 83879494  | 597‡  | 1 |           |   |
| 2 | 84467988  | 84476707  | 600‡  | 1 |           |   |
| 2 | 88876863  | 88890156  | 606‡  | 1 |           |   |
| 2 | 89050190  | 89057157  | 607‡  | 1 |           |   |
| 2 | 90143021  | 90151122  | 611‡  | 1 |           |   |
| 2 | 96217143  | 96223325  | W-8†  | 4 |           |   |
| 2 | 97821110  | 97829456  | 624‡  | 1 |           |   |
| 2 | 98752841  | 98762005  | 626‡  | 1 |           |   |
| 2 | 99270799  | 99278498  | 627‡  | 1 |           |   |
| 2 | 99496768  | 99504336  | 629‡  | 1 |           |   |
| 2 | 100362943 | 100369057 | 631‡  | 1 |           |   |
| 2 | 101237559 | 101245118 | 634‡  | 1 |           |   |
| 2 | 102906878 | 102913577 | 637‡  | 1 |           |   |
| 2 | 104587506 | 104593989 | 639‡  | 1 |           |   |
| 2 | 105979107 | 105986046 | 642‡  | 1 |           |   |
| 2 | 105991646 | 105995245 | 643‡  | 1 |           |   |

|   |           |           |         |   |                   |     |
|---|-----------|-----------|---------|---|-------------------|-----|
| 2 | 106209213 | 106215676 | W-77†   | 4 |                   |     |
| 2 | 107941799 | 107948357 | 645‡    | 1 |                   |     |
| 2 | 108523885 | 108531469 | 646‡    | 1 |                   |     |
| 2 | 112039345 | 112044989 | ERVW-13 | 4 |                   |     |
| 2 | 114311254 | 114316006 | 653‡    | 1 |                   |     |
| 2 | 115116052 | 115124440 | 654‡    | 1 |                   |     |
| 2 | 116183340 | 116189716 | 655‡    | 1 |                   |     |
| 2 | 116252434 | 116257488 | 658‡    | 1 |                   |     |
| 2 | 116280394 | 116290747 | 657‡    | 1 |                   |     |
| 2 | 117130629 | 117135078 | 660‡    | 1 |                   |     |
| 2 | 117278977 | 117284506 | 662‡    | 1 |                   |     |
| 2 | 123496269 | 123500367 | 667‡    | 1 |                   |     |
| 2 | 123658521 | 123662113 | 668‡    | 1 |                   |     |
| 2 | 123686839 | 123689815 | 669‡    | 1 |                   |     |
| 2 | 127369875 | 127377853 | 673‡    | 1 |                   |     |
| 2 | 127616425 | 127618909 | 674‡    | 1 |                   |     |
| 2 | 128036581 | 128044455 | 676‡    | 1 |                   |     |
| 2 | 129961897 | 129969685 | 679‡    | 1 | K-76**, K(2q21.1) | 2,3 |
| 2 | 132139787 | 132147993 | 686‡    | 1 |                   |     |
| 2 | 134803886 | 134811555 | 690‡    | 1 |                   |     |
| 2 | 136071820 | 136079325 | 691‡    | 1 |                   |     |
| 2 | 136201886 | 136203359 | W-9†    | 4 |                   |     |
| 2 | 137683512 | 137688455 | 693‡    | 1 |                   |     |
| 2 | 140426373 | 140432405 | 695‡    | 1 |                   |     |
| 2 | 142488750 | 142495328 | 697‡    | 1 |                   |     |
| 2 | 142900244 | 142907915 | 698‡    | 1 | W-10†             | 4   |
| 2 | 142929044 | 142937291 | 699‡    | 1 |                   |     |
| 2 | 146544823 | 146549792 | 700‡    | 1 |                   |     |
| 2 | 146774667 | 146781265 | 701‡    | 1 |                   |     |
| 2 | 147311404 | 147319091 | 702‡    | 1 |                   |     |
| 2 | 148253645 | 148259882 | 704‡    | 1 |                   |     |
| 2 | 149318544 | 149323292 | 705‡    | 1 |                   |     |
| 2 | 150111625 | 150117340 | 707‡    | 1 |                   |     |
| 2 | 150829936 | 150836450 | 708‡    | 1 |                   |     |
| 2 | 150955428 | 150963205 | 710‡    | 1 |                   |     |
| 2 | 151309245 | 151313819 | 711‡    | 1 |                   |     |
| 2 | 152175877 | 152180478 | 713‡    | 1 |                   |     |
| 2 | 152273565 | 152279762 | 714‡    | 1 |                   |     |
| 2 | 152701399 | 152709042 | 715‡    | 1 |                   |     |
| 2 | 152961819 | 152972054 | 717‡    | 1 |                   |     |
| 2 | 154584120 | 154587590 | 720‡    | 1 |                   |     |
| 2 | 154867349 | 154874577 | 721‡    | 1 | envH3c            | 7   |
| 2 | 155404046 | 155411417 | 722‡    | 1 |                   |     |
| 2 | 155920598 | 155928181 | 723‡    | 1 |                   |     |
| 2 | 156714291 | 156725910 | 724‡    | 1 |                   |     |
| 2 | 158847011 | 158849245 | 726‡    | 1 |                   |     |
| 2 | 158865300 | 158879717 | 728‡    | 1 |                   |     |
| 2 | 158882113 | 158889851 | 727‡    | 1 |                   |     |
| 2 | 160080860 | 160089555 | 732‡    | 1 |                   |     |
| 2 | 163066654 | 163077029 | 734‡    | 1 |                   |     |
| 2 | 164171184 | 164176445 | 735‡    | 1 |                   |     |
| 2 | 164295826 | 164301567 | 736‡    | 1 |                   |     |
| 2 | 164459140 | 164463944 | 737‡    | 1 |                   |     |



|   |           |           |           |   |       |   |
|---|-----------|-----------|-----------|---|-------|---|
| 2 | 164657910 | 164659611 | W-11†     | 4 |       |   |
| 2 | 165707553 | 165716198 | HERV-H19a | 7 |       |   |
| 2 | 166609100 | 166615061 | 740‡      | 1 |       |   |
| 2 | 169129440 | 169137549 | 744‡      | 1 |       |   |
| 2 | 170112250 | 170116925 | 745‡      | 1 |       |   |
| 2 | 170973733 | 170983386 | 747‡      | 1 |       |   |
| 2 | 171560036 | 171562107 | W-12†     | 4 |       |   |
| 2 | 172512573 | 172519738 | 748‡      | 1 |       |   |
| 2 | 172542091 | 172548758 | 749‡      | 1 |       |   |
| 2 | 174202252 | 174216415 | 750‡      | 1 |       |   |
| 2 | 175325142 | 175326529 | W-78†     | 4 |       |   |
| 2 | 177409244 | 177413158 | ERVW-14   | 4 |       |   |
| 2 | 178462410 | 178463544 | W-79†     | 4 |       |   |
| 2 | 179051592 | 179057326 | 753‡      | 1 |       |   |
| 2 | 180231671 | 180239757 | 755‡      | 1 | W-80† | 4 |
| 2 | 183043787 | 183049651 | 759‡      | 1 |       |   |
| 2 | 183885573 | 183893654 | 763‡      | 1 |       |   |
| 2 | 186431386 | 186438154 | 765‡      | 1 |       |   |
| 2 | 186812953 | 186813479 | HERVK30   | 8 |       |   |
| 2 | 187169295 | 187180021 | 766‡      | 1 |       |   |
| 2 | 187200365 | 187205857 | 767‡      | 1 |       |   |
| 2 | 187510609 | 187516863 | 768‡      | 1 |       |   |
| 2 | 187558164 | 187566109 | 769‡      | 1 |       |   |
| 2 | 187670207 | 187676269 | 770‡      | 1 |       |   |
| 2 | 188033494 | 188039156 | 772‡      | 1 |       |   |
| 2 | 188168687 | 188174691 | 774‡      | 1 |       |   |
| 2 | 188904228 | 188909358 | 775‡      | 1 |       |   |
| 2 | 192130351 | 192136106 | 776‡      | 1 |       |   |
| 2 | 192505923 | 192517971 | 777‡      | 1 |       |   |
| 2 | 192918436 | 192924800 | 778‡      | 1 |       |   |
| 2 | 194087199 | 194096685 | 781‡      | 1 |       |   |
| 2 | 194130056 | 194136556 | 780‡      | 1 |       |   |
| 2 | 194154836 | 194163158 | 782‡      | 1 |       |   |
| 2 | 195334676 | 195340075 | W-13†     | 4 |       |   |
| 2 | 196123763 | 196133033 | 786‡      | 1 |       |   |
| 2 | 197578433 | 197587686 | 787‡      | 1 |       |   |
| 2 | 199179579 | 199186022 | 788‡      | 1 |       |   |
| 2 | 199246975 | 199255234 | 789‡      | 1 |       |   |
| 2 | 202498632 | 202504187 | 790‡      | 1 |       |   |
| 2 | 203960014 | 203967570 | 791‡      | 1 |       |   |
| 2 | 206253842 | 206267606 | 792‡      | 1 |       |   |
| 2 | 206804465 | 206812627 | 794‡      | 1 |       |   |
| 2 | 207017218 | 207024728 | 795‡      | 1 |       |   |
| 2 | 208213629 | 208221940 | 796‡      | 1 |       |   |
| 2 | 208386088 | 208393926 | 797‡      | 1 |       |   |
| 2 | 208893768 | 208905469 | 800‡      | 1 |       |   |
| 2 | 209078020 | 209084644 | 801‡      | 1 |       |   |
| 2 | 209299572 | 209305667 | 803‡      | 1 |       |   |
| 2 | 211259992 | 211266424 | 805‡      | 1 |       |   |
| 2 | 212439251 | 212445153 | 806‡      | 1 |       |   |
| 2 | 215089939 | 215096946 | 812‡      | 1 |       |   |
| 2 | 215922303 | 215930906 | 813‡      | 1 |       |   |
| 2 | 217590845 | 217592765 | W-14†     | 4 |       |   |

|   |           |           |                       |   |                          |     |
|---|-----------|-----------|-----------------------|---|--------------------------|-----|
| 2 | 218108678 | 218122049 | 814‡                  | 1 |                          |     |
| 2 | 218169170 | 218179890 | 817‡                  | 1 |                          |     |
| 2 | 222433749 | 222441169 | 824‡                  | 1 |                          |     |
| 2 | 223188766 | 223195390 | 826‡                  | 1 |                          |     |
| 2 | 223295924 | 223302941 | 827‡                  | 1 |                          |     |
| 2 | 224087353 | 224093515 | 829‡                  | 1 |                          |     |
| 2 | 224223927 | 224230340 | 830‡                  | 1 |                          |     |
| 2 | 224296626 | 224304268 | 831‡                  | 1 |                          |     |
| 2 | 228299893 | 228309182 | 833‡                  | 1 |                          |     |
| 2 | 231091066 | 231101400 | 836‡                  | 1 |                          |     |
| 2 | 231401095 | 231409097 | HERVER (HCML-<br>ARV) | 9 |                          |     |
| 2 | 233213615 | 233217829 | 838‡                  | 1 |                          |     |
| 2 | 237606786 | 237615508 | 843‡                  | 1 |                          |     |
| 2 | 238204719 | 238211677 | 844‡                  | 1 |                          |     |
| 2 | 238980514 | 238982406 | W-15†                 | 4 |                          |     |
| 2 | 240029814 | 240045954 | 845‡                  | 1 |                          |     |
| 2 | 240858105 | 240867672 | 846‡                  | 1 |                          |     |
| 3 | 440563    | 446848    | 848‡                  | 1 |                          |     |
| 3 | 848019    | 853278    | 849‡                  | 1 |                          |     |
| 3 | 888034    | 896790    | 850‡                  | 1 |                          |     |
| 3 | 980810    | 988725    | 851‡                  | 1 |                          |     |
| 3 | 1232835   | 1245014   | 852‡                  | 1 |                          |     |
| 3 | 4127291   | 4137307   | 856‡                  | 1 |                          |     |
| 3 | 5140823   | 5149818   | 857‡                  | 1 |                          |     |
| 3 | 5691003   | 5699780   | 858‡                  | 1 |                          |     |
| 3 | 6008570   | 6017159   | 859‡                  | 1 |                          |     |
| 3 | 6397326   | 6404316   | 860‡                  | 1 |                          |     |
| 3 | 8177024   | 8183038   | 862‡                  | 1 |                          |     |
| 3 | 8673868   | 8677601   | 863‡                  | 1 |                          |     |
| 3 | 9841750   | 9854710   | 864‡                  | 1 | K-53**,<br>K11, ERVK-2   | 2,3 |
| 3 | 11247258  | 11254838  | 865‡                  | 1 |                          |     |
| 3 | 13962999  | 13973384  | 867‡                  | 1 |                          |     |
| 3 | 14039089  | 14047393  | 868‡                  | 1 |                          |     |
| 3 | 14225211  | 14230183  | 869‡                  | 1 |                          |     |
| 3 | 15103891  | 15119995  | 871‡                  | 1 |                          |     |
| 3 | 16015596  | 16024185  | 872‡                  | 1 |                          |     |
| 3 | 16744036  | 16753334  | 874‡                  | 1 |                          |     |
| 3 | 16763830  | 16772531  | 875‡                  | 1 | ERV PABL B-1,<br>envR(b) | 6   |
| 3 | 17774297  | 17782098  | 876‡                  | 1 |                          |     |
| 3 | 19481980  | 19490450  | 877‡                  | 1 |                          |     |
| 3 | 19863060  | 19873478  | 879‡                  | 1 |                          |     |
| 3 | 20269429  | 20281828  | 882‡                  | 1 |                          |     |
| 3 | 20363963  | 20371446  | 884‡                  | 1 |                          |     |
| 3 | 20616328  | 20619030  | 886‡                  | 1 |                          |     |
| 3 | 20967544  | 20973262  | 889‡                  | 1 |                          |     |
| 3 | 21189011  | 21194217  | 890‡                  | 1 |                          |     |
| 3 | 26157598  | 26165557  | 894‡                  | 1 |                          |     |
| 3 | 26273646  | 26280860  | 897‡                  | 1 |                          |     |
| 3 | 27001024  | 27006410  | W-15†                 | 4 |                          |     |
| 3 | 27037690  | 27044517  | 901‡                  | 1 |                          |     |

|   |          |          |       |   |                   |     |
|---|----------|----------|-------|---|-------------------|-----|
| 3 | 27600384 | 27603150 | 902‡  | 1 |                   |     |
| 3 | 32067467 | 32076504 | 906‡  | 1 |                   |     |
| 3 | 32458604 | 32467714 | 909‡  | 1 |                   |     |
| 3 | 32967572 | 32973250 | 911‡  | 1 |                   |     |
| 3 | 33448363 | 33453503 | 912‡  | 1 |                   |     |
| 3 | 34518837 | 34524418 | 914‡  | 1 |                   |     |
| 3 | 34680866 | 34685086 | 915‡  | 1 |                   |     |
| 3 | 34799114 | 34807613 | 916‡  | 1 |                   |     |
| 3 | 35874403 | 35880025 | 917‡  | 1 |                   |     |
| 3 | 36130980 | 36135476 | 918‡  | 1 |                   |     |
| 3 | 36335367 | 36342727 | 920‡  | 1 |                   |     |
| 3 | 37205388 | 37210420 | 921‡  | 1 |                   |     |
| 3 | 38071423 | 38077656 | 923‡  | 1 |                   |     |
| 3 | 38289417 | 38297325 | W-16† | 4 |                   |     |
| 3 | 38422225 | 38425408 | 925‡  | 1 |                   |     |
| 3 | 38441201 | 38444753 | 926‡  | 1 |                   |     |
| 3 | 39343715 | 39353493 | 927‡  | 1 |                   |     |
| 3 | 39575103 | 39583622 | 928‡  | 1 |                   |     |
| 3 | 40560871 | 40570272 | 930‡  | 1 |                   |     |
| 3 | 44329728 | 44340878 | 934‡  | 1 |                   |     |
| 3 | 44542482 | 44550763 | 935‡  | 1 |                   |     |
| 3 | 44855961 | 44861808 | 936‡  | 1 |                   |     |
| 3 | 46001399 | 46007906 | 938‡  | 1 |                   |     |
| 3 | 46046257 | 46054342 | 937‡  | 1 |                   |     |
| 3 | 46111371 | 46118653 | 939‡  | 1 |                   |     |
| 3 | 46244375 | 46252065 | 940‡  | 1 |                   |     |
| 3 | 46329668 | 46332857 | 941‡  | 1 |                   |     |
| 3 | 46387406 | 46393402 | 942‡  | 1 |                   |     |
| 3 | 46417556 | 46423902 | 944‡  | 1 |                   |     |
| 3 | 46426677 | 46433564 | 943‡  | 1 |                   |     |
| 3 | 48272765 | 48278859 | 947‡  | 1 |                   |     |
| 3 | 48330525 | 48336241 | W-17† | 4 |                   |     |
| 3 | 48722938 | 48730005 | 948‡  | 1 |                   |     |
| 3 | 49221068 | 49229119 | 950‡  | 1 |                   |     |
| 3 | 51741983 | 51750532 | 957‡  | 1 |                   |     |
| 3 | 51849803 | 51857061 | 958‡  | 1 |                   |     |
| 3 | 54070309 | 54076496 | 960‡  | 1 |                   |     |
| 3 | 54634482 | 54640204 | 962‡  | 1 |                   |     |
| 3 | 57304052 | 57310296 | 965‡  | 1 |                   |     |
| 3 | 58585014 | 58595736 | 967‡  | 1 |                   |     |
| 3 | 67037862 | 67044184 | 971‡  | 1 |                   |     |
| 3 | 67833379 | 67838443 | 973‡  | 1 |                   |     |
| 3 | 70433897 | 70440419 | 975‡  | 1 |                   |     |
| 3 | 70537123 | 70540939 | 976‡  | 1 |                   |     |
| 3 | 72023117 | 72028917 | 977‡  | 1 |                   |     |
| 3 | 73152821 | 73159745 | 978‡  | 1 |                   |     |
| 3 | 74825206 | 74831248 | 980‡  | 1 |                   |     |
| 3 | 74872832 | 74878086 | W-18† | 4 |                   |     |
| 3 | 75136271 | 75144660 | 982‡  | 1 |                   |     |
| 3 | 75360056 | 75365719 | 983‡  | 1 |                   |     |
| 3 | 75551278 | 75559986 | 985‡  | 1 | K-39**, K(3p12.3) | 2,3 |
| 3 | 75602237 | 75607614 | 987‡  | 1 |                   |     |
| 3 | 75804823 | 75808628 | 988‡  | 1 |                   |     |

|   |           |           |        |   |                             |     |
|---|-----------|-----------|--------|---|-----------------------------|-----|
| 3 | 76529468  | 76538616  | 989‡   | 1 |                             |     |
| 3 | 77919496  | 77923363  | 990‡   | 1 |                             |     |
| 3 | 78323942  | 78332553  | 991‡   | 1 |                             |     |
| 3 | 78581209  | 78588919  | 992‡   | 1 |                             |     |
| 3 | 79051952  | 79060460  | 994‡   | 1 |                             |     |
| 3 | 79772982  | 79780773  | 995‡   | 1 |                             |     |
| 3 | 80307502  | 80315397  | 996‡   | 1 |                             |     |
| 3 | 80386505  | 80389944  | 997‡   | 1 |                             |     |
| 3 | 82640479  | 82651810  | 999‡   | 1 |                             |     |
| 3 | 83270126  | 83283646  | 1002‡  | 1 |                             |     |
| 3 | 84186512  | 84194839  | 1004‡  | 1 |                             |     |
| 3 | 86536924  | 86543598  | 1007‡  | 1 |                             |     |
| 3 | 86691171  | 86697005  | 1008‡  | 1 |                             |     |
| 3 | 87567159  | 87578578  | 1012‡  | 1 |                             |     |
| 3 | 87607605  | 87616289  | 1011‡  | 1 |                             |     |
| 3 | 87733675  | 87741290  | 1013‡  | 1 |                             |     |
| 3 | 87927737  | 87943931  | 1014‡  | 1 |                             |     |
| 3 | 90083099  | 90086688  | 1017‡  | 1 |                             |     |
| 3 | 93938046  | 93955754  | 1023‡  | 1 |                             |     |
| 3 | 94292381  | 94301159  | 1024‡  | 1 |                             |     |
| 3 | 94647907  | 94654790  | 1025‡  | 1 |                             |     |
| 3 | 95587596  | 95595445  | 1027‡  | 1 |                             |     |
| 3 | 96297745  | 96307311  | 1031‡  | 1 |                             |     |
| 3 | 96666474  | 96675444  | W-19†  | 4 |                             |     |
| 3 | 97269333  | 97277375  | 1033‡  | 1 |                             |     |
| 3 | 98191273  | 98198747  | 1035‡  | 1 |                             |     |
| 3 | 98242356  | 98249303  | 1036‡  | 1 |                             |     |
| 3 | 100442425 | 100451579 | 1041‡  | 1 |                             |     |
| 3 | 101632045 | 101642053 | 1043‡  | 1 |                             |     |
| 3 | 101692114 | 101701253 | 1045‡  | 1 | K-18**,<br>K(II), ERVK-5    | 2,3 |
| 3 | 102735685 | 102742206 | 1046‡  | 1 |                             |     |
| 3 | 103048259 | 103057544 | 1047‡  | 1 |                             |     |
| 3 | 103208975 | 103215821 | 1048‡  | 1 |                             |     |
| 3 | 103594506 | 103600851 | 1049‡  | 1 |                             |     |
| 3 | 104283483 | 104286311 | 1051‡  | 1 |                             |     |
| 3 | 104439933 | 104445795 | 1054‡  | 1 |                             |     |
| 3 | 106922752 | 106928387 | 1056‡  | 1 |                             |     |
| 3 | 107564215 | 107572787 | 1058‡  | 1 |                             |     |
| 3 | 110964490 | 110969942 | 1060‡  | 1 |                             |     |
| 3 | 111523394 | 111530913 | 1061‡  | 1 |                             |     |
| 3 | 112301855 | 112308520 | 1063‡  | 1 |                             |     |
| 3 | 112413020 | 112423381 | 1064‡  | 1 |                             |     |
| 3 | 112690299 | 112701577 | 1066‡  | 1 |                             |     |
| 3 | 113024276 | 113033435 | K-12** | 2 | K68, ERVK-3,<br>K106, K(C3) | 3   |
| 3 | 113346633 | 113354655 | 1068‡  | 1 |                             |     |
| 3 | 113521757 | 113529684 | 1069‡  | 1 |                             |     |
| 3 | 115742108 | 115757987 | 1073‡  | 1 | W-81†                       | 4   |
| 3 | 115789963 | 115799166 | 1074‡  | 1 |                             |     |
| 3 | 116105362 | 116111232 | 1075‡  | 1 |                             |     |
| 3 | 118842462 | 118852150 | 1077‡  | 1 |                             |     |
| 3 | 119683827 | 119695879 | 1079‡  | 1 |                             |     |

|   |           |           |              |   |             |   |
|---|-----------|-----------|--------------|---|-------------|---|
| 3 | 119978070 | 119990309 | 1080‡        | 1 |             |   |
| 3 | 120038402 | 120045736 | 1081‡        | 1 |             |   |
| 3 | 120489514 | 120496605 | 1083‡        | 1 |             |   |
| 3 | 120616846 | 120623596 | 1084‡        | 1 |             |   |
| 3 | 121069123 | 121079507 | 1086‡        | 1 |             |   |
| 3 | 121396266 | 121398658 | 1090‡        | 1 |             |   |
| 3 | 121603092 | 121615941 | 1091‡        | 1 |             |   |
| 3 | 124752568 | 124758183 | 1094‡        | 1 |             |   |
| 3 | 125695363 | 125698911 | 1096‡        | 1 |             |   |
| 3 | 125717296 | 125722966 | 1098‡        | 1 |             |   |
| 3 | 125740222 | 125745590 | 1097‡        | 1 |             |   |
| 3 | 125863796 | 125869503 | 1100‡        | 1 |             |   |
| 3 | 125890458 | 125899596 | K-19**       | 2 | K(I),ERVK-4 | 3 |
| 3 | 126093177 | 126102115 | 1104‡        | 1 |             |   |
| 3 | 127892822 | 127899641 | 1108‡        | 1 |             |   |
| 3 | 128828222 | 128834858 | 1110‡        | 1 |             |   |
| 3 | 128836995 | 128842027 | 1109‡        | 1 |             |   |
| 3 | 128854508 | 128860206 | 1111‡        | 1 |             |   |
| 3 | 128919296 | 128929231 | 1112‡        | 1 |             |   |
| 3 | 128959811 | 128965383 | 1113‡        | 1 |             |   |
| 3 | 129168485 | 129171834 | 1114‡        | 1 |             |   |
| 3 | 129901265 | 129907244 | 1115‡        | 1 |             |   |
| 3 | 130024231 | 130029463 | 1116‡        | 1 |             |   |
| 3 | 130059217 | 130064971 | 1117‡        | 1 |             |   |
| 3 | 130141303 | 130147638 | 1118‡        | 1 |             |   |
| 3 | 130176662 | 130184109 | 1119‡        | 1 |             |   |
| 3 | 130444248 | 130453246 | 1120‡        | 1 |             |   |
| 3 | 131196860 | 131199106 | W-20†        | 4 |             |   |
| 3 | 131510663 | 131514160 | 1122‡        | 1 |             |   |
| 3 | 132296071 | 132303493 | 1124‡        | 1 |             |   |
| 3 | 133429748 | 133437214 | 1127‡        | 1 |             |   |
| 3 | 134020020 | 134027485 | 1128‡        | 1 |             |   |
| 3 | 135935348 | 135938908 | W-82†        | 4 |             |   |
| 3 | 136217441 | 136223584 | 1130‡        | 1 |             |   |
| 3 | 137595586 | 137602352 | 1132‡        | 1 |             |   |
| 3 | 140872142 | 140879194 | 1136‡        | 1 |             |   |
| 3 | 141205016 | 141211726 | 1138‡        | 1 |             |   |
| 3 | 141819789 | 141821513 | ERVW-3-2013* | 4 |             |   |
| 3 | 142438178 | 142443654 | W-83†        | 4 |             |   |
| 3 | 143797679 | 143805775 | 1143‡        | 1 |             |   |
| 3 | 144900721 | 144908765 | 1148‡        | 1 |             |   |
| 3 | 145112476 | 145119227 | 1149‡        | 1 |             |   |
| 3 | 145551228 | 145556922 | 1151‡        | 1 |             |   |
| 3 | 145710495 | 145716095 | ERVH 3q24    | 5 |             |   |
| 3 | 145748677 | 145755946 | 1153‡        | 1 |             |   |
| 3 | 146333468 | 146339816 | 1156‡        | 1 |             |   |
| 3 | 146353854 | 146359465 | 1154‡        | 1 |             |   |
| 3 | 146362290 | 146366792 | 1155‡        | 1 |             |   |
| 3 | 146407146 | 146411603 | 1157‡        | 1 |             |   |
| 3 | 147717742 | 147725798 | 1158‡        | 1 |             |   |
| 3 | 147877267 | 147884289 | 1159‡        | 1 |             |   |
| 3 | 148128358 | 148136351 | 1161‡        | 1 |             |   |
| 3 | 148151529 | 148157665 | 1160‡        | 1 |             |   |

|   |           |           |       |   |                 |     |
|---|-----------|-----------|-------|---|-----------------|-----|
| 3 | 148414237 | 148420100 | 1162‡ | 1 |                 |     |
| 3 | 148552182 | 148567777 | 1163‡ | 1 | K-52**, ERVK-13 | 2,3 |
| 3 | 148570644 | 148578146 | 1164‡ | 1 |                 |     |
| 3 | 149287867 | 149295516 | 1166‡ | 1 |                 |     |
| 3 | 149752188 | 149761298 | 1168‡ | 1 | W-21†           | 4   |
| 3 | 150856940 | 150862604 | 1170‡ | 1 |                 |     |
| 3 | 151465884 | 151475799 | 1171‡ | 1 |                 |     |
| 3 | 151665734 | 151669272 | 1174‡ | 1 |                 |     |
| 3 | 151702444 | 151705104 | 1175‡ | 1 |                 |     |
| 3 | 151806149 | 151812025 | 1176‡ | 1 |                 |     |
| 3 | 152559625 | 152565247 | 1178‡ | 1 |                 |     |
| 3 | 152596604 | 152605968 | 1179‡ | 1 |                 |     |
| 3 | 153227333 | 153232106 | 1180‡ | 1 |                 |     |
| 3 | 153820582 | 153829132 | 1182‡ | 1 |                 |     |
| 3 | 154366898 | 154378402 | 1184‡ | 1 |                 |     |
| 3 | 154978075 | 154979301 | W-84† | 4 |                 |     |
| 3 | 155273426 | 155280798 | 1186‡ | 1 |                 |     |
| 3 | 156620461 | 156626567 | 1188‡ | 1 |                 |     |
| 3 | 157579428 | 157587863 | 1189‡ | 1 |                 |     |
| 3 | 161719768 | 161728303 | 1194‡ | 1 |                 |     |
| 3 | 161847677 | 161851962 | 1196‡ | 1 |                 |     |
| 3 | 161974610 | 161978770 | 1197‡ | 1 |                 |     |
| 3 | 162044736 | 162052582 | 1198‡ | 1 |                 |     |
| 3 | 162154682 | 162159189 | 1199‡ | 1 |                 |     |
| 3 | 162323663 | 162330878 | 1200‡ | 1 | W-85†           | 4   |
| 3 | 162576247 | 162588011 | 1201‡ | 1 |                 |     |
| 3 | 162712591 | 162718243 | 1202‡ | 1 |                 |     |
| 3 | 162722651 | 162727081 | 1203‡ | 1 |                 |     |
| 3 | 163691960 | 163698982 | 1205‡ | 1 | W-22†           | 4   |
| 3 | 163804219 | 163810425 | 1206‡ | 1 |                 |     |
| 3 | 163907530 | 163917444 | 1208‡ | 1 |                 |     |
| 3 | 164017709 | 164026159 | 1209‡ | 1 |                 |     |
| 3 | 164216084 | 164220126 | 1210‡ | 1 |                 |     |
| 3 | 164334101 | 164341632 | 1211‡ | 1 |                 |     |
| 3 | 164342192 | 164347864 | 1212‡ | 1 |                 |     |
| 3 | 164813385 | 164818652 | 1216‡ | 1 |                 |     |
| 3 | 165620767 | 165623493 | 1217‡ | 1 |                 |     |
| 3 | 166499438 | 166506425 | 1219‡ | 1 |                 |     |
| 3 | 166822766 | 166829672 | 1220‡ | 1 | envH2c          | 7   |
| 3 | 167177009 | 167183906 | 1223‡ | 1 |                 |     |
| 3 | 167266302 | 167274617 | 1224‡ | 1 |                 |     |
| 3 | 167422682 | 167431167 | 1225‡ | 1 |                 |     |
| 3 | 168562105 | 168571031 | 1227‡ | 1 |                 |     |
| 3 | 170671662 | 170678282 | 1229‡ | 1 |                 |     |
| 3 | 170681796 | 170689384 | 1230‡ | 1 |                 |     |
| 3 | 170815977 | 170824559 | 1233‡ | 1 |                 |     |
| 3 | 171576672 | 171582177 | 1234‡ | 1 |                 |     |
| 3 | 172719014 | 172730461 | 1236‡ | 1 |                 |     |
| 3 | 173155216 | 173161544 | 1237‡ | 1 |                 |     |
| 3 | 173275813 | 173281646 | 1239‡ | 1 |                 |     |
| 3 | 175053399 | 175055792 | 1242‡ | 1 |                 |     |
| 3 | 175827526 | 175836206 | 1244‡ | 1 |                 |     |
| 3 | 176062509 | 176071373 | 1245‡ | 1 |                 |     |

|   |           |           |         |   |                       |     |
|---|-----------|-----------|---------|---|-----------------------|-----|
| 3 | 176321618 | 176327363 | 1246‡   | 1 |                       |     |
| 3 | 176505838 | 176515568 | 1247‡   | 1 |                       |     |
| 3 | 177657044 | 177671140 | 1248‡   | 1 |                       |     |
| 3 | 178207467 | 178214645 | 1249‡   | 1 |                       |     |
| 3 | 179055107 | 179062330 | 1250‡   | 1 | ERVW-5-2013*          | 4   |
| 3 | 179515305 | 179527182 | 1251‡   | 1 |                       |     |
| 3 | 185014729 | 185019517 | 1256‡   | 1 |                       |     |
| 3 | 185105203 | 185111049 | 1257‡   | 1 |                       |     |
| 3 | 185372296 | 185380593 | 1259‡   | 1 |                       |     |
| 3 | 185562547 | 185571727 | K-15**  | 2 | K50b,K117,<br>ERVK-11 | 3   |
| 3 | 186657774 | 186669162 | 1262‡   | 1 |                       |     |
| 3 | 186865307 | 186875043 | 1264‡   | 1 |                       |     |
| 3 | 187174196 | 187181059 | 1265‡   | 1 |                       |     |
| 3 | 187463747 | 187472000 | 1266‡   | 1 |                       |     |
| 3 | 190144600 | 190152062 | 1267‡   | 1 | ERVH 3q26             | 5   |
| 3 | 190920160 | 190928374 | 1268‡   | 1 |                       |     |
| 3 | 190987337 | 190994562 | 1269‡   | 1 |                       |     |
| 3 | 191185385 | 191191000 | 1271‡   | 1 |                       |     |
| 3 | 191658783 | 191665592 | W-86†   | 1 |                       |     |
| 3 | 191892186 | 191901268 | 1274‡   | 1 |                       |     |
| 3 | 192069188 | 192076868 | 1275‡   | 1 |                       |     |
| 3 | 192995636 | 193001828 | 1276‡   | 1 |                       |     |
| 3 | 193599956 | 193613333 | 1278‡   | 1 |                       |     |
| 3 | 196520031 | 196525494 | 1280‡   | 1 |                       |     |
| 3 | 197243000 | 197248821 | 1281‡   | 1 |                       |     |
| 4 | 191762    | 197074    | W-23†   | 4 |                       |     |
| 4 | 240028    | 246321    | 1284‡   | 1 | K-82**, K(4p16.3a)    | 2,3 |
| 4 | 399612    | 409299    | 1285‡   | 1 |                       |     |
| 4 | 3046337   | 3056570   | 1286‡   | 1 |                       |     |
| 4 | 3453923   | 3459728   | 1287‡   | 1 |                       |     |
| 4 | 3893385   | 3896665   | 1288‡   | 1 |                       |     |
| 4 | 3977323   | 3986912   | K-35**  | 2 | K77                   | 3   |
| 4 | 3999152   | 4005713   | 1290‡   | 1 |                       |     |
| 4 | 4042123   | 4049022   | 1291‡   | 1 |                       |     |
| 4 | 4130684   | 4133908   | 1296‡   | 1 |                       |     |
| 4 | 4163946   | 4170548   | 1294‡   | 1 |                       |     |
| 4 | 8420364   | 8427765   | ERVW-15 | 4 |                       |     |
| 4 | 8482383   | 8488709   | 1298‡   | 1 |                       |     |
| 4 | 8942271   | 8947865   | 1300‡   | 1 |                       |     |
| 4 | 8973526   | 8977087   | 1299‡   | 1 |                       |     |
| 4 | 9094450   | 9108450   | 1302‡   | 1 |                       |     |
| 4 | 9121945   | 9131359   | 1303‡   | 1 | K17b                  | 3   |
| 4 | 9451190   | 9455960   | 1309‡   | 1 |                       |     |
| 4 | 9476817   | 9480370   | 1308‡   | 1 |                       |     |
| 4 | 9505689   | 9519520   | 1310‡   | 1 |                       |     |
| 4 | 9638437   | 9647147   | 1313‡   | 1 |                       |     |
| 4 | 9657955   | 9667550   | K-36**  | 2 | K50c                  | 3   |
| 4 | 9760952   | 9765008   | 1315‡   | 1 |                       |     |
| 4 | 10170014  | 10172994  | 1316‡   | 1 |                       |     |
| 4 | 10298528  | 10302998  | 1317‡   | 1 |                       |     |
| 4 | 11653552  | 11659272  | 1321‡   | 1 |                       |     |

|   |          |          |       |   |             |   |
|---|----------|----------|-------|---|-------------|---|
| 4 | 11806450 | 11813044 | 1323‡ | 1 |             |   |
| 4 | 12363876 | 12370411 | 1324‡ | 1 |             |   |
| 4 | 14169935 | 14175976 | 1325‡ | 1 |             |   |
| 4 | 16997747 | 17003973 | 1329‡ | 1 |             |   |
| 4 | 19887557 | 19893078 | 1334‡ | 1 |             |   |
| 4 | 20192760 | 20198283 | 1335‡ | 1 |             |   |
| 4 | 20629770 | 20635978 | 1336‡ | 1 |             |   |
| 4 | 22599563 | 22605466 | 1339‡ | 1 |             |   |
| 4 | 23722377 | 23727827 | 1342‡ | 1 | ERVH 4p15.2 | 5 |
| 4 | 24323423 | 24328998 | 1343‡ | 1 |             |   |
| 4 | 24500975 | 24508027 | 1347‡ | 1 |             |   |
| 4 | 24965777 | 24971666 | 1349‡ | 1 |             |   |
| 4 | 25238665 | 25247155 | 1350‡ | 1 |             |   |
| 4 | 27974871 | 27981380 | 1351‡ | 1 |             |   |
| 4 | 28303093 | 28310170 | 1352‡ | 1 |             |   |
| 4 | 31605213 | 31611533 | 1356‡ | 1 |             |   |
| 4 | 32322907 | 32328769 | 1359‡ | 1 |             |   |
| 4 | 33730342 | 33736918 | 1362‡ | 1 |             |   |
| 4 | 33741505 | 33743350 | W-87† | 4 |             |   |
| 4 | 35018131 | 35022409 | 1366‡ | 1 |             |   |
| 4 | 35100553 | 35108982 | 1365‡ | 1 |             |   |
| 4 | 35140073 | 35149080 | 1368‡ | 1 |             |   |
| 4 | 35338849 | 35345580 | 1370‡ | 1 |             |   |
| 4 | 35855428 | 35864930 | 1371‡ | 1 |             |   |
| 4 | 36432085 | 36445064 | 1372‡ | 1 | W-24†       | 4 |
| 4 | 36905752 | 36913355 | 1374‡ | 1 |             |   |
| 4 | 37545757 | 37552478 | 1376‡ | 1 |             |   |
| 4 | 39485146 | 39490242 | 1378‡ | 1 |             |   |
| 4 | 39539259 | 39544115 | 1379‡ | 1 |             |   |
| 4 | 42280999 | 42290046 | 1383‡ | 1 |             |   |
| 4 | 43444312 | 43450609 | 1386‡ | 1 |             |   |
| 4 | 43468815 | 43472830 | 1385‡ | 1 |             |   |
| 4 | 44820276 | 44828664 | 1387‡ | 1 |             |   |
| 4 | 44986714 | 44997578 | 1388‡ | 1 |             |   |
| 4 | 45042048 | 45049024 | 1389‡ | 1 |             |   |
| 4 | 45320086 | 45331835 | 1390‡ | 1 |             |   |
| 4 | 45531370 | 45536823 | 1392‡ | 1 |             |   |
| 4 | 45607746 | 45612818 | 1393‡ | 1 |             |   |
| 4 | 46516561 | 46526518 | 1396‡ | 1 |             |   |
| 4 | 46859706 | 46867656 | 1398‡ | 1 |             |   |
| 4 | 53236811 | 53255667 | 1405‡ | 1 |             |   |
| 4 | 53483030 | 53494214 | 1406‡ | 1 |             |   |
| 4 | 54020048 | 54025559 | 1407‡ | 1 |             |   |
| 4 | 55938235 | 55948225 | 1412‡ | 1 |             |   |
| 4 | 58292291 | 58295878 | 1414‡ | 1 |             |   |
| 4 | 58306084 | 58309619 | 1413‡ | 1 |             |   |
| 4 | 58458022 | 58466147 | 1417‡ | 1 |             |   |
| 4 | 61763571 | 61769538 | 1419‡ | 1 |             |   |
| 4 | 62161515 | 62167023 | 1420‡ | 1 |             |   |
| 4 | 62417950 | 62424697 | 1422‡ | 1 |             |   |
| 4 | 62971017 | 62976546 | 1424‡ | 1 | W-88†       | 4 |
| 4 | 63053094 | 63062446 | 1425‡ | 1 |             |   |
| 4 | 63184692 | 63192967 | 1426‡ | 1 |             |   |



|   |          |          |        |   |           |   |
|---|----------|----------|--------|---|-----------|---|
| 4 | 63574222 | 63578474 | 1427‡  | 1 |           |   |
| 4 | 63996468 | 64001319 | 1428‡  | 1 |           |   |
| 4 | 64142256 | 64145477 | 1429‡  | 1 |           |   |
| 4 | 64562733 | 64569783 | 1434‡  | 1 |           |   |
| 4 | 64711940 | 64719469 | 1435‡  | 1 |           |   |
| 4 | 64725819 | 64735619 | 1436‡  | 1 |           |   |
| 4 | 65807715 | 65815675 | 1437‡  | 1 |           |   |
| 4 | 67266725 | 67281328 | 1438‡  | 1 |           |   |
| 4 | 67450493 | 67463204 | 1439‡  | 1 |           |   |
| 4 | 68029331 | 68036051 | 1440‡  | 1 |           |   |
| 4 | 68570072 | 68576698 | 1444‡  | 1 |           |   |
| 4 | 68578241 | 68581296 | 1443‡  | 1 |           |   |
| 4 | 68597990 | 68603505 | K-63** | 2 | K(4q32.1) | 3 |
| 4 | 68672569 | 68677360 | 1445‡  | 1 |           |   |
| 4 | 68745010 | 68750591 | 1446‡  | 1 |           |   |
| 4 | 68901784 | 68906033 | 1448‡  | 1 |           |   |
| 4 | 69055851 | 69065083 | 1449‡  | 1 |           |   |
| 4 | 69191846 | 69199167 | 1450‡  | 1 |           |   |
| 4 | 69825835 | 69831487 | 1452‡  | 1 |           |   |
| 4 | 70536280 | 70556413 | 1454‡  | 1 |           |   |
| 4 | 71031763 | 71037274 | 1455‡  | 1 |           |   |
| 4 | 71638290 | 71645800 | 1458‡  | 1 |           |   |
| 4 | 71804679 | 71810385 | 1459‡  | 1 |           |   |
| 4 | 72925575 | 72933186 | W-25†  | 4 |           |   |
| 4 | 73357145 | 73370272 | 1463‡  | 1 |           |   |
| 4 | 73665456 | 73671851 | 1464‡  | 1 |           |   |
| 4 | 73949626 | 73952769 | 1465‡  | 1 |           |   |
| 4 | 74083502 | 74094041 | 1466‡  | 1 |           |   |
| 4 | 74434677 | 74440296 | 1467‡  | 1 |           |   |
| 4 | 76042819 | 76050735 | 1472‡  | 1 |           |   |
| 4 | 77392267 | 77400204 | 1474‡  | 1 |           |   |
| 4 | 77630583 | 77637015 | 1475‡  | 1 |           |   |
| 4 | 78713534 | 78719721 | 1476‡  | 1 |           |   |
| 4 | 79547893 | 79560603 | 1477‡  | 1 |           |   |
| 4 | 80175999 | 80180720 | 1478‡  | 1 |           |   |
| 4 | 82473317 | 82483151 | 1481‡  | 1 | W-89†     | 4 |
| 4 | 83201917 | 83208400 | 1483‡  | 1 |           |   |
| 4 | 83505780 | 83510402 | 1484‡  | 1 |           |   |
| 4 | 85352125 | 85355394 | W-26†  | 4 |           |   |
| 4 | 86462194 | 86465422 | 1488‡  | 1 |           |   |
| 4 | 86474750 | 86480520 | 1489‡  | 1 |           |   |
| 4 | 87397600 | 87407732 | 1491‡  | 1 |           |   |
| 4 | 87921803 | 87927332 | 1493‡  | 1 |           |   |
| 4 | 88342456 | 88349306 | 1494‡  | 1 |           |   |
| 4 | 88442633 | 88453881 | 1495‡  | 1 |           |   |
| 4 | 89964784 | 89970379 | 1496‡  | 1 |           |   |
| 4 | 90446530 | 90455373 | 1497‡  | 1 |           |   |
| 4 | 91089124 | 91098058 | 1501‡  | 1 |           |   |
| 4 | 91175554 | 91187307 | 1500‡  | 1 |           |   |
| 4 | 91353206 | 91359382 | 1503‡  | 1 |           |   |
| 4 | 91623616 | 91634466 | 1505‡  | 1 |           |   |
| 4 | 91652658 | 91661263 | 1506‡  | 1 |           |   |
| 4 | 91697653 | 91701712 | 1507‡  | 1 |           |   |

|   |           |           |       |   |       |   |
|---|-----------|-----------|-------|---|-------|---|
| 4 | 91768553  | 91778058  | 1508‡ | 1 |       |   |
| 4 | 92023985  | 92031172  | 1510‡ | 1 |       |   |
| 4 | 92038714  | 92046496  | 1509‡ | 1 |       |   |
| 4 | 92271491  | 92277648  | 1513‡ | 1 |       |   |
| 4 | 92438180  | 92444199  | 1514‡ | 1 |       |   |
| 4 | 94085679  | 94090058  | 1516‡ | 1 |       |   |
| 4 | 94149505  | 94162185  | 1518‡ | 1 |       |   |
| 4 | 94291864  | 94299580  | 1520‡ | 1 |       |   |
| 4 | 94382924  | 94389281  | 1519‡ | 1 |       |   |
| 4 | 97096906  | 97102604  | 1523‡ | 1 |       |   |
| 4 | 99013445  | 99021899  | 1527‡ | 1 |       |   |
| 4 | 99171452  | 99190269  | 1528‡ | 1 |       |   |
| 4 | 99365785  | 99371257  | 1531‡ | 1 |       |   |
| 4 | 99485807  | 99492119  | 1532‡ | 1 |       |   |
| 4 | 100992906 | 100997352 | 1535‡ | 1 |       |   |
| 4 | 101630840 | 101638436 | 1536‡ | 1 |       |   |
| 4 | 101669091 | 101678357 | 1537‡ | 1 |       |   |
| 4 | 101899964 | 101906852 | 1538‡ | 1 |       |   |
| 4 | 102235267 | 102245925 | 1539‡ | 1 |       |   |
| 4 | 103223743 | 103231279 | 1542‡ | 1 |       |   |
| 4 | 103549496 | 103560707 | 1543‡ | 1 |       |   |
| 4 | 103941482 | 103948508 | 1544‡ | 1 |       |   |
| 4 | 103971059 | 103979131 | 1545‡ | 1 |       |   |
| 4 | 105487788 | 105489200 | W-90† | 4 |       |   |
| 4 | 106110154 | 106115653 | 1549‡ | 1 |       |   |
| 4 | 106884907 | 106903325 | 1550‡ | 1 |       |   |
| 4 | 107329652 | 107334481 | 1552‡ | 1 |       |   |
| 4 | 107379706 | 107388552 | 1553‡ | 1 |       |   |
| 4 | 107584696 | 107597311 | 1555‡ | 1 |       |   |
| 4 | 107724255 | 107729701 | 1557‡ | 1 |       |   |
| 4 | 107732980 | 107741355 | 1556‡ | 1 |       |   |
| 4 | 109312805 | 109321394 | 1559‡ | 1 |       |   |
| 4 | 109855977 | 109860952 | 1561‡ | 1 |       |   |
| 4 | 110279107 | 110283937 | 1563‡ | 1 |       |   |
| 4 | 112207493 | 112213993 | 1566‡ | 1 |       |   |
| 4 | 114047116 | 114056633 | 1568‡ | 1 | W-91† | 4 |
| 4 | 114586735 | 114596374 | 1570‡ | 1 |       |   |
| 4 | 115950631 | 115956482 | 1575‡ | 1 |       |   |
| 4 | 115972090 | 115981899 | 1574‡ | 1 |       |   |
| 4 | 116014844 | 116020614 | 1576‡ | 1 |       |   |
| 4 | 117252107 | 117257789 | 1577‡ | 1 |       |   |
| 4 | 117589961 | 117597414 | 1579‡ | 1 |       |   |
| 4 | 117927338 | 117946630 | 1580‡ | 1 |       |   |
| 4 | 119993637 | 119999678 | 1584‡ | 1 |       |   |
| 4 | 124471343 | 124477064 | 1588‡ | 1 |       |   |
| 4 | 125562659 | 125568661 | 1589‡ | 1 |       |   |
| 4 | 126131247 | 126137460 | 1591‡ | 1 |       |   |
| 4 | 126143809 | 126150543 | 1590‡ | 1 |       |   |
| 4 | 126186191 | 126193664 | 1592‡ | 1 |       |   |
| 4 | 127271438 | 127277471 | 1593‡ | 1 |       |   |
| 4 | 127510634 | 127517102 | 1594‡ | 1 |       |   |
| 4 | 128260328 | 128267686 | 1595‡ | 1 |       |   |
| 4 | 128638924 | 128646616 | 1596‡ | 1 |       |   |

|   |           |           |         |   |           |   |
|---|-----------|-----------|---------|---|-----------|---|
| 4 | 130567405 | 130575152 | 1598‡   | 1 |           |   |
| 4 | 130767409 | 130776264 | 1599‡   | 1 |           |   |
| 4 | 130843381 | 130848132 | 1600‡   | 1 |           |   |
| 4 | 130852052 | 130860404 | 1601‡   | 1 |           |   |
| 4 | 130941056 | 130949725 | 1602‡   | 1 |           |   |
| 4 | 131006703 | 131015389 | 1603‡   | 1 |           |   |
| 4 | 132118161 | 132125940 | 1605‡   | 1 |           |   |
| 4 | 132351322 | 132355913 | 1606‡   | 1 |           |   |
| 4 | 132812626 | 132818770 | 1610‡   | 1 |           |   |
| 4 | 132882299 | 132889138 | ERVW-16 | 4 |           |   |
| 4 | 133263571 | 133268926 | 1613‡   | 1 |           |   |
| 4 | 133584454 | 133592658 | 1615‡   | 1 |           |   |
| 4 | 133947016 | 133955695 | 1617‡   | 1 |           |   |
| 4 | 133993262 | 133997581 | 1619‡   | 1 |           |   |
| 4 | 134012212 | 134018381 | 1620‡   | 1 |           |   |
| 4 | 134524751 | 134534104 | 1621‡   | 1 |           |   |
| 4 | 134677129 | 134686407 | 1622‡   | 1 |           |   |
| 4 | 135168346 | 135174465 | 1624‡   | 1 |           |   |
| 4 | 135955329 | 135960688 | 1627‡   | 1 |           |   |
| 4 | 136610406 | 136618649 | 1629‡   | 1 |           |   |
| 4 | 137478454 | 137486830 | 1632‡   | 1 |           |   |
| 4 | 138621786 | 138627199 | W-27†   | 4 |           |   |
| 4 | 138927814 | 138934855 | 1637‡   | 1 |           |   |
| 4 | 139442392 | 139449817 | 1638‡   | 1 |           |   |
| 4 | 140214524 | 140219785 | 1639‡   | 1 |           |   |
| 4 | 141938170 | 141940840 | 1641‡   | 1 |           |   |
| 4 | 143177946 | 143180459 | 1643‡   | 1 |           |   |
| 4 | 145251085 | 145256773 | 1645‡   | 1 |           |   |
| 4 | 145698823 | 145704802 | 1646‡   | 1 |           |   |
| 4 | 145832801 | 145842028 | 1647‡   | 1 |           |   |
| 4 | 146526364 | 146536064 | 1648‡   | 1 |           |   |
| 4 | 149101877 | 149108860 | 1650‡   | 1 |           |   |
| 4 | 151811903 | 151818084 | 1653‡   | 1 |           |   |
| 4 | 152741356 | 152747147 | 1654‡   | 1 |           |   |
| 4 | 152841828 | 152842330 | W-92†   | 4 |           |   |
| 4 | 153690317 | 153693920 | 1658‡   | 1 |           |   |
| 4 | 154055335 | 154063391 | 1659‡   | 1 |           |   |
| 4 | 154836002 | 154840022 | 1661‡   | 1 |           |   |
| 4 | 154919506 | 154925620 | 1662‡   | 1 |           |   |
| 4 | 155106628 | 155114249 | 1663‡   | 1 |           |   |
| 4 | 156103700 | 156109189 | 1664‡   | 1 |           |   |
| 4 | 156600196 | 156606035 | 1665‡   | 1 |           |   |
| 4 | 158292771 | 158299045 | 1667‡   | 1 |           |   |
| 4 | 158657797 | 158665839 | 1669‡   | 1 |           |   |
| 4 | 160267984 | 160282507 | 1672‡   | 1 |           |   |
| 4 | 160658785 | 160661286 | K-83**  | 2 | K(4q32.3) | 3 |
| 4 | 160662407 | 160671794 | 1673‡   | 1 |           |   |
| 4 | 161251905 | 161257850 | 1675‡   | 1 |           |   |
| 4 | 162709291 | 162714751 | 1676‡   | 1 |           |   |
| 4 | 163093170 | 163103788 | 1679‡   | 1 |           |   |
| 4 | 163174063 | 163180359 | 1678‡   | 1 |           |   |
| 4 | 163187135 | 163195403 | 1680‡   | 1 |           |   |
| 4 | 164655631 | 164658152 | W-93†   | 4 |           |   |

|   |           |           |       |   |                        |     |
|---|-----------|-----------|-------|---|------------------------|-----|
| 4 | 164995690 | 165005061 | 1685‡ | 1 | K-55**,<br>K5, ERVK-12 | 2,3 |
| 4 | 166520700 | 166526629 | 1687‡ | 1 |                        |     |
| 4 | 166716125 | 166723500 | 1688‡ | 1 |                        |     |
| 4 | 167416700 | 167424219 | 1690‡ | 1 |                        |     |
| 4 | 167436931 | 167442164 | 1691‡ | 1 |                        |     |
| 4 | 167876296 | 167883501 | 1692‡ | 1 |                        |     |
| 4 | 167922966 | 167930710 | 1693‡ | 1 |                        |     |
| 4 | 168019184 | 168028641 | 1696‡ | 1 |                        |     |
| 4 | 170123787 | 170134887 | 1698‡ | 1 |                        |     |
| 4 | 170190192 | 170197104 | W-28† | 4 |                        |     |
| 4 | 170677760 | 170682607 | 1702‡ | 1 |                        |     |
| 4 | 170685364 | 170690309 | 1703‡ | 1 |                        |     |
| 4 | 171985056 | 171990068 | 1708‡ | 1 |                        |     |
| 4 | 172368818 | 172377031 | 1710‡ | 1 |                        |     |
| 4 | 172955653 | 172962359 | 1711‡ | 1 |                        |     |
| 4 | 173098723 | 173106034 | 1712‡ | 1 |                        |     |
| 4 | 174982917 | 174990374 | 1716‡ | 1 |                        |     |
| 4 | 175444248 | 175451834 | 1718‡ | 1 |                        |     |
| 4 | 175460253 | 175467035 | 1717‡ | 1 |                        |     |
| 4 | 176291963 | 176300290 | 1720‡ | 1 |                        |     |
| 4 | 176344477 | 176348812 | 1719‡ | 1 |                        |     |
| 4 | 178207120 | 178213765 | 1721‡ | 1 |                        |     |
| 4 | 179165302 | 179170593 | 1722‡ | 1 |                        |     |
| 4 | 179402065 | 179412935 | 1723‡ | 1 |                        |     |
| 4 | 179720512 | 179728321 | 1724‡ | 1 |                        |     |
| 4 | 182814310 | 182822012 | 1725‡ | 1 |                        |     |
| 4 | 182999701 | 183006175 | 1727‡ | 1 | W-94†                  | 4   |
| 4 | 184736175 | 184745240 | 1728‡ | 1 |                        |     |
| 4 | 184915778 | 184920994 | 1729‡ | 1 |                        |     |
| 4 | 185046625 | 185051532 | 1731‡ | 1 |                        |     |
| 4 | 186043578 | 186049597 | 1734‡ | 1 |                        |     |
| 4 | 186241148 | 186247584 | 1735‡ | 1 |                        |     |
| 4 | 189478988 | 189485403 | 1737‡ | 1 |                        |     |
| 4 | 189925281 | 189933307 | 1739‡ | 1 |                        |     |
| 4 | 189979818 | 189990326 | 1740‡ | 1 |                        |     |
| 4 | 190106257 | 190113553 | 1741‡ | 1 | K(5p13.3)              | 3   |
| 5 | 242215    | 247919    | 1742‡ | 1 |                        |     |
| 5 | 702471    | 709207    | 1744‡ | 1 |                        |     |
| 5 | 1577341   | 1585389   | 1745‡ | 1 |                        |     |
| 5 | 3947660   | 3954207   | 1746‡ | 1 |                        |     |
| 5 | 5515523   | 5525255   | 1747‡ | 1 |                        |     |
| 5 | 7055181   | 7063702   | 1748‡ | 1 |                        |     |
| 5 | 7263553   | 7272092   | 1749‡ | 1 |                        |     |
| 5 | 8996700   | 9009343   | 1753‡ | 1 |                        |     |
| 5 | 10716140  | 10724937  | 1756‡ | 1 |                        |     |
| 5 | 12488366  | 12493021  | 1757‡ | 1 |                        |     |
| 5 | 12663588  | 12668504  | 1758‡ | 1 |                        |     |
| 5 | 12853740  | 12857674  | 1759‡ | 1 |                        |     |
| 5 | 13195736  | 13201946  | 1761‡ | 1 |                        |     |
| 5 | 15059474  | 15065477  | 1763‡ | 1 |                        |     |
| 5 | 16419969  | 16426090  | 1764‡ | 1 |                        |     |
| 5 | 18535712  | 18544015  | 1766‡ | 1 |                        |     |

|   |          |          |        |   |                   |     |
|---|----------|----------|--------|---|-------------------|-----|
| 5 | 18666945 | 18676153 | 1767‡  | 1 |                   |     |
| 5 | 18783767 | 18786322 | 1768‡  | 1 |                   |     |
| 5 | 19301540 | 19305598 | 1770‡  | 1 |                   |     |
| 5 | 19700450 | 19709745 | 1773‡  | 1 |                   |     |
| 5 | 20336873 | 20347868 | 1774‡  | 1 |                   |     |
| 5 | 22094000 | 22103145 | 1778‡  | 1 |                   |     |
| 5 | 22930028 | 22935120 | 1779‡  | 1 |                   |     |
| 5 | 24296855 | 24314450 | 1782‡  | 1 |                   |     |
| 5 | 24387294 | 24400938 | 1783‡  | 1 |                   |     |
| 5 | 24649688 | 24654408 | 1785‡  | 1 |                   |     |
| 5 | 28047326 | 28050844 | 1788‡  | 1 |                   |     |
| 5 | 29389977 | 29396444 | 1790‡  | 1 |                   |     |
| 5 | 30198185 | 30202940 | 1791‡  | 1 |                   |     |
| 5 | 30485109 | 30495950 | 1793‡  | 1 | K-16**, K104,K50d | 2,3 |
| 5 | 31390075 | 31399000 | 1795‡  | 1 |                   |     |
| 5 | 32548455 | 32560424 | 1797‡  | 1 |                   |     |
| 5 | 32662801 | 32667449 | 1798‡  | 1 |                   |     |
| 5 | 32672573 | 32678102 | 1799‡  | 1 |                   |     |
| 5 | 34461059 | 34468430 | 1805‡  | 1 |                   |     |
| 5 | 34783712 | 34786931 | 1806‡  | 1 |                   |     |
| 5 | 36326414 | 36332735 | 1811‡  | 1 | W-29†             | 4   |
| 5 | 37086408 | 37093990 | 1812‡  | 1 |                   |     |
| 5 | 37264634 | 37272610 | 1813‡  | 1 |                   |     |
| 5 | 37778276 | 37786017 | 1814‡  | 1 |                   |     |
| 5 | 40102935 | 40112191 | 1818‡  | 1 |                   |     |
| 5 | 41993612 | 41999954 | 1822‡  | 1 |                   |     |
| 5 | 42111369 | 42121250 | 1823‡  | 1 |                   |     |
| 5 | 42813507 | 42819811 | 1824‡  | 1 |                   |     |
| 5 | 43320823 | 43333455 | 1827‡  | 1 |                   |     |
| 5 | 43786481 | 43798179 | 1829‡  | 1 |                   |     |
| 5 | 44110503 | 44120113 | 1830‡  | 1 | W-95†             | 4   |
| 5 | 44788562 | 44794266 | 1831‡  | 1 |                   |     |
| 5 | 44983796 | 44994994 | 1832‡  | 1 |                   |     |
| 5 | 45795223 | 45803390 | 1834‡  | 1 |                   |     |
| 5 | 46000056 | 46009900 | K-28** | 2 | K(5q33.3)         | 3   |
| 5 | 50370090 | 50377918 | 1841‡  | 1 |                   |     |
| 5 | 50444531 | 50452389 | 1842‡  | 1 |                   |     |
| 5 | 52304528 | 52310225 | 1844‡  | 1 |                   |     |
| 5 | 53198639 | 53213339 | 1846‡  | 1 |                   |     |
| 5 | 53218344 | 53233107 | 1847‡  | 1 |                   |     |
| 5 | 54500208 | 54504482 | 1849‡  | 1 |                   |     |
| 5 | 55083586 | 55091235 | 1850‡  | 1 |                   |     |
| 5 | 57016452 | 57022311 | 1852‡  | 1 |                   |     |
| 5 | 57520022 | 57522889 | W-30†  | 4 |                   |     |
| 5 | 59301790 | 59315633 | 1855‡  | 1 |                   |     |
| 5 | 60658494 | 60666453 | W-96†  | 4 |                   |     |
| 5 | 63562727 | 63570811 | 1864‡  | 1 |                   |     |
| 5 | 64153367 | 64161940 | 1866‡  | 1 |                   |     |
| 5 | 69636156 | 69655311 | 1870‡  | 1 |                   |     |
| 5 | 70208439 | 70230075 | 1872‡  | 1 |                   |     |
| 5 | 70512460 | 70531584 | 1874‡  | 1 |                   |     |
| 5 | 70656902 | 70664791 | 1875‡  | 1 |                   |     |

|   |           |           |         |   |                     |   |
|---|-----------|-----------|---------|---|---------------------|---|
| 5 | 71209040  | 71229599  | 1876‡   | 1 |                     |   |
| 5 | 71571927  | 71578401  | 1878‡   | 1 | ERVK3-3,<br>HML6-c5 | 6 |
| 5 | 72926262  | 72936085  | 1879‡   | 1 |                     |   |
| 5 | 75982538  | 75998007  | 1881‡   | 1 |                     |   |
| 5 | 76357245  | 76363340  | 1882‡   | 1 |                     |   |
| 5 | 76881216  | 76889560  | 1884‡   | 1 |                     |   |
| 5 | 76909228  | 76912976  | 1885‡   | 1 |                     |   |
| 5 | 80891240  | 80901510  | 1889‡   | 1 |                     |   |
| 5 | 81953354  | 81960604  | 1891‡   | 1 |                     |   |
| 5 | 82267546  | 82273706  | 1892‡   | 1 |                     |   |
| 5 | 82969108  | 82975992  | 1894‡   | 1 |                     |   |
| 5 | 84698759  | 84705172  | 1896‡   | 1 |                     |   |
| 5 | 86461998  | 86464211  | 1899‡   | 1 |                     |   |
| 5 | 86565175  | 86571021  | 1901‡   | 1 |                     |   |
| 5 | 87510331  | 87520378  | 1903‡   | 1 |                     |   |
| 5 | 88176770  | 88177883  | W-31†   | 4 |                     |   |
| 5 | 89793886  | 89795037  | W-97†   | 4 |                     |   |
| 5 | 92823494  | 92835883  | 1905‡   | 1 |                     |   |
| 5 | 93431619  | 93432157  | HERVK31 | 8 |                     |   |
| 5 | 95706083  | 95713306  | 1906‡   | 1 |                     |   |
| 5 | 96164810  | 96172177  | 1908‡   | 1 |                     |   |
| 5 | 97308888  | 97318147  | 1909‡   | 1 |                     |   |
| 5 | 98079624  | 98093183  | 1912‡   | 1 |                     |   |
| 5 | 98434748  | 98439402  | 1914‡   | 1 |                     |   |
| 5 | 99012118  | 99016954  | 1916‡   | 1 |                     |   |
| 5 | 99983418  | 99989401  | 1918‡   | 1 |                     |   |
| 5 | 100982837 | 100990224 | 1921‡   | 1 |                     |   |
| 5 | 101315475 | 101320608 | 1922‡   | 1 |                     |   |
| 5 | 102334881 | 102350860 | 1924‡   | 1 |                     |   |
| 5 | 104031710 | 104037314 | 1926‡   | 1 |                     |   |
| 5 | 104063634 | 104070481 | 1925‡   | 1 |                     |   |
| 5 | 104591882 | 104599386 | 1928‡   | 1 |                     |   |
| 5 | 106977917 | 106986698 | 1932‡   | 1 |                     |   |
| 5 | 108566970 | 108574212 | 1936‡   | 1 | W-32†               | 4 |
| 5 | 108574724 | 108580784 | 1937‡   | 1 | W-32†               | 4 |
| 5 | 110533798 | 110545603 | 1939‡   | 1 |                     |   |
| 5 | 111920695 | 111926701 | 1942‡   | 1 |                     |   |
| 5 | 112446654 | 112450414 | 1944‡   | 1 |                     |   |
| 5 | 112450448 | 112450706 | W-98†   | 4 |                     |   |
| 5 | 112524093 | 112532633 | 1945‡   | 1 |                     |   |
| 5 | 112580171 | 112585414 | 1946‡   | 1 |                     |   |
| 5 | 113612499 | 113623185 | 1947‡   | 1 |                     |   |
| 5 | 113713004 | 113714468 | 1948‡   | 1 |                     |   |
| 5 | 113771017 | 113777157 | 1950‡   | 1 |                     |   |
| 5 | 114139138 | 114148369 | 1951‡   | 1 |                     |   |
| 5 | 114989910 | 114999922 | 1954‡   | 1 |                     |   |
| 5 | 115038014 | 115041205 | 1953‡   | 1 |                     |   |
| 5 | 117046239 | 117051810 | 1959‡   | 1 |                     |   |
| 5 | 118948084 | 118952819 | 1960‡   | 1 |                     |   |
| 5 | 119424565 | 119430783 | 1961‡   | 1 |                     |   |
| 5 | 120695403 | 120703258 | 1962‡   | 1 |                     |   |
| 5 | 121857479 | 121860935 | 1964‡   | 1 |                     |   |

|   |           |           |             |   |                            |   |
|---|-----------|-----------|-------------|---|----------------------------|---|
| 5 | 122474226 | 122478846 | ERVH 5q23.2 | 5 |                            |   |
| 5 | 122616935 | 122624322 | 1968‡       | 1 |                            |   |
| 5 | 124303871 | 124309835 | 1972‡       | 1 |                            |   |
| 5 | 124497035 | 124502740 | 1973‡       | 1 |                            |   |
| 5 | 124966327 | 124972226 | 1975‡       | 1 |                            |   |
| 5 | 125662086 | 125668429 | 1976‡       | 1 |                            |   |
| 5 | 125914725 | 125929139 | 1978‡       | 1 |                            |   |
| 5 | 126221417 | 126229981 | 1979‡       | 1 |                            |   |
| 5 | 126669058 | 126676287 | 1981‡       | 1 |                            |   |
| 5 | 126838562 | 126845494 | 1982‡       | 1 |                            |   |
| 5 | 130541761 | 130550098 | 1988‡       | 1 |                            |   |
| 5 | 130633543 | 130642238 | 1989‡       | 1 |                            |   |
| 5 | 131571798 | 131582180 | 1992‡       | 1 |                            |   |
| 5 | 135730387 | 135737338 | 1994‡       | 1 | ERVH 5q31.1                | 5 |
| 5 | 136301334 | 136307654 | 1995‡       | 1 |                            |   |
| 5 | 136413881 | 136414650 | K-81**      | 2 |                            |   |
| 5 | 136540941 | 136543623 | 1999‡       | 1 |                            |   |
| 5 | 136544956 | 136551812 | 1997‡       | 1 |                            |   |
| 5 | 136565217 | 136571216 | 2000‡       | 1 |                            |   |
| 5 | 139502943 | 139512402 | 2003‡       | 1 |                            |   |
| 5 | 140902474 | 140912825 | 2006‡       | 1 |                            |   |
| 5 | 143088591 | 143095011 | 2007‡       | 1 |                            |   |
| 5 | 144609329 | 144616900 | 2010‡       | 1 |                            |   |
| 5 | 147254793 | 147261673 | 2012‡       | 1 |                            |   |
| 5 | 147715837 | 147734078 | 2013‡       | 1 |                            |   |
| 5 | 147868278 | 147874526 | 2014‡       | 1 |                            |   |
| 5 | 151242363 | 151251256 | 2015‡       | 1 |                            |   |
| 5 | 152717235 | 152730830 | 2017‡       | 1 |                            |   |
| 5 | 153447151 | 153455941 | 2019‡       | 1 |                            |   |
| 5 | 154635952 | 154644655 | K-42**      | 2 | K18b                       | 3 |
| 5 | 154878590 | 154886115 | 2022‡       | 1 |                            |   |
| 5 | 156657705 | 156666885 | K-11**      | 2 | K(C5),ERVK-10,<br>K107/K10 | 3 |
| 5 | 157879935 | 157887868 | 2026‡       | 1 |                            |   |
| 5 | 159366332 | 159373656 | 2029‡       | 1 |                            |   |
| 5 | 160116064 | 160131138 | 2030‡       | 1 |                            |   |
| 5 | 160931934 | 160937891 | 2031‡       | 1 |                            |   |
| 5 | 161246595 | 161253830 | 2033‡       | 1 |                            |   |
| 5 | 162273719 | 162281160 | 2035‡       | 1 |                            |   |
| 5 | 163313040 | 163319470 | 2039‡       | 1 |                            |   |
| 5 | 163334352 | 163340585 | 2038‡       | 1 |                            |   |
| 5 | 166128082 | 166136169 | 2042‡       | 1 |                            |   |
| 5 | 166737246 | 166744683 | 2043‡       | 1 |                            |   |
| 5 | 167293104 | 167303376 | 2044‡       | 1 |                            |   |
| 5 | 170759469 | 170767864 | 2045‡       | 1 |                            |   |
| 5 | 171000084 | 171008716 | 2046‡       | 1 |                            |   |
| 5 | 172397493 | 172401609 | 2048‡       | 1 |                            |   |
| 5 | 175991930 | 176006067 | 2049‡       | 1 |                            |   |
| 5 | 179047878 | 179056363 | 2054‡       | 1 |                            |   |
| 5 | 180408151 | 180420673 | 2055‡       | 1 |                            |   |
| 6 | 164023    | 174392    | K-30**      | 2 |                            |   |
| 6 | 1330046   | 1331614   | W-33‡       | 4 |                            |   |
| 6 | 2310409   | 2317792   | 2059‡       | 1 |                            |   |

|   |          |          |          |   |                              |   |
|---|----------|----------|----------|---|------------------------------|---|
| 6 | 3054799  | 3055508  | K-78**   | 2 |                              |   |
| 6 | 3167220  | 3173917  | 2061‡    | 1 |                              |   |
| 6 | 4385051  | 4390448  | 2063‡    | 1 |                              |   |
| 6 | 6026435  | 6033624  | 2065‡    | 1 |                              |   |
| 6 | 6064907  | 6068400  | 2064‡    | 1 |                              |   |
| 6 | 9722137  | 9729086  | 2070‡    | 1 |                              |   |
| 6 | 11102489 | 11111838 | ERVFRD-1 | 6 |                              |   |
| 6 | 11788205 | 11792174 | 2074‡    | 1 |                              |   |
| 6 | 12667285 | 12673011 | 2076‡    | 1 |                              |   |
| 6 | 13881107 | 13887724 | 2077‡    | 1 | W-99†                        | 4 |
| 6 | 14294643 | 14302844 | 2078‡    | 1 |                              |   |
| 6 | 16223549 | 16231781 | 2081‡    | 1 |                              |   |
| 6 | 16259015 | 16264895 | 2080‡    | 1 |                              |   |
| 6 | 16455877 | 16464625 | 2082‡    | 1 |                              |   |
| 6 | 16885359 | 16893697 | 2083‡    | 1 |                              |   |
| 6 | 17318968 | 17327356 | 2084‡    | 1 |                              |   |
| 6 | 18752717 | 18760301 | 2086‡    | 1 |                              |   |
| 6 | 19272959 | 19277520 | 2089‡    | 1 |                              |   |
| 6 | 19399479 | 19406918 | 2090‡    | 1 |                              |   |
| 6 | 19539526 | 19547919 | 2091‡    | 1 |                              |   |
| 6 | 21355921 | 21367062 | 2092‡    | 1 |                              |   |
| 6 | 23108037 | 23116504 | 2094‡    | 1 |                              |   |
| 6 | 23160963 | 23168456 | 2093‡    | 1 |                              |   |
| 6 | 24667711 | 24680423 | 2095‡    | 1 |                              |   |
| 6 | 26288074 | 26296131 | 2098‡    | 1 |                              |   |
| 6 | 27178264 | 27186526 | 2100‡    | 1 |                              |   |
| 6 | 27187511 | 27196283 | 2101‡    | 1 |                              |   |
| 6 | 28682589 | 28692958 | K-29**   | 2 | K(OLDAL121932),<br>K69,K20   | 3 |
| 6 | 28764870 | 28776541 | 2104‡    | 1 |                              |   |
| 6 | 29245477 | 29252808 | 2107‡    | 1 |                              |   |
| 6 | 29875650 | 29881048 | 2108‡    | 1 |                              |   |
| 6 | 31232914 | 31236558 | 2113‡    | 1 |                              |   |
| 6 | 31328757 | 31337552 | 2112‡    | 1 |                              |   |
| 6 | 31984671 | 31991654 | 2116‡    | 1 |                              |   |
| 6 | 32017409 | 32024392 | 2115‡    | 1 |                              |   |
| 6 | 32471841 | 32481344 | 2118‡    | 1 |                              |   |
| 6 | 32493818 | 32501013 | 2119‡    | 1 |                              |   |
| 6 | 32559943 | 32567318 | 2120‡    | 1 |                              |   |
| 6 | 33047983 | 33059205 | 2121‡    | 1 |                              |   |
| 6 | 33117733 | 33125012 | 2122‡    | 1 |                              |   |
| 6 | 33340850 | 33352438 | 2123‡    | 1 |                              |   |
| 6 | 35561857 | 35567823 | 2124‡    | 1 |                              |   |
| 6 | 38616529 | 38624444 | 2126‡    | 1 |                              |   |
| 6 | 39993396 | 39999029 | 2128‡    | 1 |                              |   |
| 6 | 40861389 | 40868726 | 2129‡    | 1 |                              |   |
| 6 | 42893670 | 42903629 | K-41**   | 2 | K(OLDAL035587),<br>KOLD35587 | 3 |
| 6 | 45236449 | 45241799 | 2134‡    | 1 |                              |   |
| 6 | 47308179 | 47315993 | 2135‡    | 1 |                              |   |
| 6 | 47634877 | 47647929 | 2136‡    | 1 |                              |   |
| 6 | 48873676 | 48879725 | 2137‡    | 1 |                              |   |
| 6 | 49502123 | 49510578 | 2139‡    | 1 |                              |   |



|   |          |          |        |   |                       |     |
|---|----------|----------|--------|---|-----------------------|-----|
| 6 | 49887706 | 49892519 | 2140‡  | 1 |                       |     |
| 6 | 51938225 | 51944432 | 2144‡  | 1 |                       |     |
| 6 | 52914875 | 52921914 | W-34†  | 4 |                       |     |
| 6 | 56013167 | 56016619 | 2151‡  | 1 |                       |     |
| 6 | 57069287 | 57080996 | 2152‡  | 1 |                       |     |
| 6 | 58392835 | 58403931 | 2157‡  | 1 |                       |     |
| 6 | 58411652 | 58420248 | 2156‡  | 1 |                       |     |
| 6 | 60652252 | 60663180 | 2153‡  | 1 | K-59**, K23           | 2,3 |
| 6 | 61160200 | 61175522 | 2162‡  | 1 |                       |     |
| 6 | 61193018 | 61204756 | 2161‡  | 1 |                       |     |
| 6 | 61275192 | 61281058 | 2160‡  | 1 |                       |     |
| 6 | 61286216 | 61294797 | 2159‡  | 1 |                       |     |
| 6 | 61600186 | 61606274 | 2164‡  | 1 |                       |     |
| 6 | 62586045 | 62591721 | 2166‡  | 1 |                       |     |
| 6 | 62791746 | 62797477 | 2167‡  | 1 |                       |     |
| 6 | 63077514 | 63086650 | 2169‡  | 1 |                       |     |
| 6 | 63321318 | 63335844 | 2170‡  | 1 |                       |     |
| 6 | 63950260 | 63956533 | 2171‡  | 1 |                       |     |
| 6 | 64024007 | 64032792 | 2172‡  | 1 |                       |     |
| 6 | 64298261 | 64302393 | 2175‡  | 1 |                       |     |
| 6 | 64326123 | 64339408 | 2174‡  | 1 |                       |     |
| 6 | 65007289 | 65014564 | 2177‡  | 1 | W-100†                | 4   |
| 6 | 66161649 | 66174210 | 2180‡  | 1 |                       |     |
| 6 | 66704772 | 66705714 | 2181‡  | 1 |                       |     |
| 6 | 67519872 | 67532550 | 2184‡  | 1 |                       |     |
| 6 | 67869321 | 67874919 | 2188‡  | 1 |                       |     |
| 6 | 67881033 | 67889369 | 2187‡  | 1 | ERVH-3,<br>HERV-H/F   | 6   |
| 6 | 68599467 | 68608245 | 2192‡  | 1 |                       |     |
| 6 | 69206011 | 69214206 | 2193‡  | 1 |                       |     |
| 6 | 69469873 | 69475710 | 2194‡  | 1 |                       |     |
| 6 | 70436656 | 70448522 | 2196‡  | 1 |                       |     |
| 6 | 71747697 | 71753831 | 2199‡  | 1 |                       |     |
| 6 | 72185826 | 72193197 | 2201‡  | 1 |                       |     |
| 6 | 73903872 | 73910957 | 2204‡  | 1 |                       |     |
| 6 | 74468181 | 74474337 | 2208‡  | 1 |                       |     |
| 6 | 76487519 | 76496663 | 2209‡  | 1 |                       |     |
| 6 | 77504274 | 77513914 | 2211‡  | 1 |                       |     |
| 6 | 77591494 | 77597500 | 2212‡  | 1 |                       |     |
| 6 | 77658207 | 77666402 | 2213‡  | 1 |                       |     |
| 6 | 77716944 | 77726366 | K-9**  | 2 | ERVK-9,<br>K109,K(C6) | 3   |
| 6 | 78132473 | 78140711 | 2216‡  | 1 |                       |     |
| 6 | 78583746 | 78589136 | 2218‡  | 1 |                       |     |
| 6 | 78854115 | 78859151 | 2219‡  | 1 |                       |     |
| 6 | 80109512 | 80113639 | 2223‡  | 1 |                       |     |
| 6 | 80475484 | 80488343 | 2224‡  | 1 |                       |     |
| 6 | 80507801 | 80515803 | 2225‡  | 1 |                       |     |
| 6 | 80648718 | 80653177 | 2226‡  | 1 |                       |     |
| 6 | 81058224 | 81064741 | 2228‡  | 1 |                       |     |
| 6 | 81337134 | 81351822 | 2230‡  | 1 | W-101†                | 4   |
| 6 | 81883048 | 81889558 | 2232‡  | 1 |                       |     |
| 6 | 83443759 | 83450390 | W-102† | 4 |                       |     |

|   |           |           |         |   |        |   |
|---|-----------|-----------|---------|---|--------|---|
| 6 | 84711701  | 84721150  | W-35†   | 4 |        |   |
| 6 | 84944217  | 84945310  | W-103†  | 4 |        |   |
| 6 | 85086391  | 85098633  | 2240‡   | 1 |        |   |
| 6 | 85854703  | 85867615  | 2242‡   | 1 |        |   |
| 6 | 86472989  | 86481664  | 2248‡   | 1 |        |   |
| 6 | 86498945  | 86501364  | 2249‡   | 1 |        |   |
| 6 | 86671995  | 86681327  | 2251‡   | 1 |        |   |
| 6 | 88404565  | 88419780  | 2255‡   | 1 | W-36†  | 4 |
| 6 | 88662251  | 88670881  | 2256‡   | 1 | ERVE-4 | 6 |
| 6 | 90670017  | 90675595  | 2259‡   | 1 |        |   |
| 6 | 93660600  | 93667867  | 2261‡   | 1 |        |   |
| 6 | 93825187  | 93837557  | 2262‡   | 1 |        |   |
| 6 | 94553199  | 94559610  | 2263‡   | 1 |        |   |
| 6 | 97779293  | 97789709  | 2266‡   | 1 |        |   |
| 6 | 98166615  | 98173385  | 2267‡   | 1 |        |   |
| 6 | 99019302  | 99026459  | 2268‡   | 1 |        |   |
| 6 | 99261740  | 99267046  | 2269‡   | 1 |        |   |
| 6 | 100944610 | 100952256 | 2272‡   | 1 |        |   |
| 6 | 101223588 | 101232976 | 2273‡   | 1 |        |   |
| 6 | 102102387 | 102108875 | 2275‡   | 1 |        |   |
| 6 | 102292727 | 102300693 | 2276‡   | 1 |        |   |
| 6 | 102631420 | 102638257 | 2277‡   | 1 |        |   |
| 6 | 106228136 | 106235814 | ERVW-17 | 4 |        |   |
| 6 | 106807737 | 106820753 | 2282‡   | 1 |        |   |
| 6 | 107299412 | 107300743 | W-104†  | 4 |        |   |
| 6 | 109851791 | 109861853 | 2285‡   | 1 |        |   |
| 6 | 109888672 | 109893202 | 2284‡   | 1 |        |   |
| 6 | 110499173 | 110506068 | 2287‡   | 1 |        |   |
| 6 | 110917873 | 110928127 | 2288‡   | 1 |        |   |
| 6 | 111130928 | 111141848 | 2289‡   | 1 | W-105† | 4 |
| 6 | 113263300 | 113267207 | 2292‡   | 1 |        |   |
| 6 | 114010996 | 114018008 | 2294‡   | 1 |        |   |
| 6 | 114422438 | 114428336 | 2295‡   | 1 |        |   |
| 6 | 114997809 | 115004280 | 2297‡   | 1 |        |   |
| 6 | 115030726 | 115042978 | 2296‡   | 1 |        |   |
| 6 | 115232072 | 115241395 | 2298‡   | 1 |        |   |
| 6 | 116091022 | 116100418 | 2301‡   | 1 |        |   |
| 6 | 117658787 | 117665200 | 2303‡   | 1 |        |   |
| 6 | 118574056 | 118578291 | 2306‡   | 1 |        |   |
| 6 | 118579852 | 118590655 | 2305‡   | 1 |        |   |
| 6 | 118617102 | 118626810 | 2307‡   | 1 |        |   |
| 6 | 119394057 | 119399037 | 2310‡   | 1 |        |   |
| 6 | 119764798 | 119771994 | 2312‡   | 1 |        |   |
| 6 | 120460881 | 120468083 | 2313‡   | 1 |        |   |
| 6 | 120925044 | 120931119 | 2314‡   | 1 |        |   |
| 6 | 121041384 | 121049351 | 2315‡   | 1 |        |   |
| 6 | 121191690 | 121199363 | 2317‡   | 1 |        |   |
| 6 | 121617319 | 121626521 | 2318‡   | 1 |        |   |
| 6 | 121979109 | 121996577 | 2319‡   | 1 |        |   |
| 6 | 122504871 | 122514220 | 2320‡   | 1 |        |   |
| 6 | 122590475 | 122600659 | 2321‡   | 1 |        |   |
| 6 | 122741798 | 122749237 | 2322‡   | 1 |        |   |
| 6 | 122838869 | 122845748 | 2323‡   | 1 |        |   |

|   |           |           |         |   |                    |     |
|---|-----------|-----------|---------|---|--------------------|-----|
| 6 | 123556844 | 123562657 | 2324‡   | 1 |                    |     |
| 6 | 123582330 | 123588017 | 2325‡   | 1 |                    |     |
| 6 | 124890407 | 124897762 | 2328‡   | 1 |                    |     |
| 6 | 125700303 | 125707480 | 2329‡   | 1 |                    |     |
| 6 | 126848846 | 126854456 | 2331‡   | 1 |                    |     |
| 6 | 130192281 | 130199095 | 2334‡   | 1 |                    |     |
| 6 | 131294372 | 131300270 | 2339‡   | 1 |                    |     |
| 6 | 131323296 | 131329145 | 2338‡   | 1 |                    |     |
| 6 | 131338777 | 131348185 | 2337‡   | 1 |                    |     |
| 6 | 131401453 | 131414194 | 2340‡   | 1 |                    |     |
| 6 | 131900684 | 131907723 | 2342‡   | 1 |                    |     |
| 6 | 134598240 | 134605136 | 2344‡   | 1 |                    |     |
| 6 | 137060290 | 137067134 | 2345‡   | 1 |                    |     |
| 6 | 137163034 | 137170722 | 2346‡   | 1 |                    |     |
| 6 | 137717276 | 137724946 | 2348‡   | 1 | W-37†              | 4   |
| 6 | 140255439 | 140263080 | 2349‡   | 1 |                    |     |
| 6 | 140329788 | 140336058 | 2350‡   | 1 |                    |     |
| 6 | 140687304 | 140702293 | 2352‡   | 1 |                    |     |
| 6 | 141175511 | 141183953 | 2353‡   | 1 |                    |     |
| 6 | 141452940 | 141460677 | 2356‡   | 1 |                    |     |
| 6 | 141955572 | 141965391 | 2357‡   | 1 |                    |     |
| 6 | 142015649 | 142022089 | 2358‡   | 1 | ERVH 6q24.1        | 5   |
| 6 | 142536878 | 142541544 | 2359‡   | 1 |                    |     |
| 6 | 143077708 | 143086385 | 2360‡   | 1 | ERVW-18            | 4   |
| 6 | 144116324 | 144121561 | W-38†   | 4 |                    |     |
| 6 | 144923392 | 144932448 | 2365‡   | 1 | ERVH 6q24.2        | 5   |
| 6 | 145104064 | 145108661 | 2366‡   | 1 |                    |     |
| 6 | 145567897 | 145573953 | 2368‡   | 1 |                    |     |
| 6 | 146447176 | 146456490 | 2370‡   | 1 |                    |     |
| 6 | 148639772 | 148645510 | 2371‡   | 1 |                    |     |
| 6 | 150849238 | 150856692 | 2372‡   | 1 |                    |     |
| 6 | 150856845 | 150862887 | 2373‡   | 1 | K-72**, K(7p22.1a) | 2,3 |
| 6 | 152037902 | 152042443 | 2375‡   | 1 |                    |     |
| 6 | 152490629 | 152497176 | 2377‡   | 1 |                    |     |
| 6 | 153404513 | 153418847 | 2378‡   | 1 |                    |     |
| 6 | 153923208 | 153938073 | 2380‡   | 1 |                    |     |
| 6 | 157700363 | 157706464 | 2381‡   | 1 |                    |     |
| 6 | 158156792 | 158169360 | 2382‡   | 1 |                    |     |
| 6 | 158296637 | 158303484 | 2383‡   | 1 |                    |     |
| 6 | 158611703 | 158621178 | 2384‡   | 1 |                    |     |
| 6 | 158880395 | 158889163 | 2386‡   | 1 |                    |     |
| 6 | 160228651 | 160234323 | 2387‡   | 1 |                    |     |
| 6 | 160286610 | 160292314 | 2388‡   | 1 |                    |     |
| 6 | 160777446 | 160780103 | 2390‡   | 1 |                    |     |
| 6 | 164336950 | 164344806 | 2393‡   | 1 |                    |     |
| 6 | 164652122 | 164657950 | 2394‡   | 1 |                    |     |
| 6 | 164807530 | 164814293 | 2395‡   | 1 |                    |     |
| 6 | 165057411 | 165066437 | 2396‡   | 1 |                    |     |
| 6 | 165459656 | 165462231 | 2399‡   | 1 |                    |     |
| 6 | 165525284 | 165530535 | 2400‡   | 1 |                    |     |
| 6 | 166891079 | 166898253 | ERVW-19 | 4 |                    |     |
| 6 | 169117392 | 169125403 | 2405‡   | 1 |                    |     |

|   |           |           |        |   |                            |   |
|---|-----------|-----------|--------|---|----------------------------|---|
| 6 | 170594858 | 170596596 | 2407‡  | 1 |                            |   |
| 7 | 4590930   | 4600359   | 2409‡  | 1 | K108R,ERVK-6               | 3 |
| 7 | 5021037   | 5028572   | 2411‡  | 1 |                            |   |
| 7 | 6840768   | 6845943   | 2413‡  | 1 |                            |   |
| 7 | 6871227   | 6875725   | 2416‡  | 1 |                            |   |
| 7 | 6903782   | 6912297   | 2417‡  | 1 |                            |   |
| 7 | 6947702   | 6958742   | 2415‡  | 1 |                            |   |
| 7 | 9016778   | 9025574   | 2419‡  | 1 |                            |   |
| 7 | 9352195   | 9359230   | 2420‡  | 1 |                            |   |
| 7 | 9451832   | 9464225   | 2421‡  | 1 |                            |   |
| 7 | 11594242  | 11600178  | 2424‡  | 1 |                            |   |
| 7 | 12066556  | 12075076  | 2425‡  | 1 |                            |   |
| 7 | 12289622  | 12296117  | 2427‡  | 1 |                            |   |
| 7 | 12589989  | 12596310  | 2428‡  | 1 | ERVFH21-1,<br>HERV-F(XA34) | 6 |
| 7 | 12852946  | 12853677  | W-39†  | 4 |                            |   |
| 7 | 16677069  | 16677893  | W-40†  | 4 |                            |   |
| 7 | 17414063  | 17420763  | 2432‡  | 1 |                            |   |
| 7 | 19653821  | 19660927  | 2433‡  | 1 |                            |   |
| 7 | 20120709  | 20126557  | 2434‡  | 1 |                            |   |
| 7 | 20545776  | 20555651  | 2435‡  | 1 |                            |   |
| 7 | 21500901  | 21508350  | 2436‡  | 1 |                            |   |
| 7 | 21547319  | 21556347  | 2437‡  | 1 |                            |   |
| 7 | 22703358  | 22709314  | 2439‡  | 1 |                            |   |
| 7 | 22913414  | 22917709  | 2440‡  | 1 |                            |   |
| 7 | 23073208  | 23086251  | 2441‡  | 1 |                            |   |
| 7 | 23854623  | 23861992  | 2443‡  | 1 |                            |   |
| 7 | 24396491  | 24401068  | 2444‡  | 1 |                            |   |
| 7 | 24789380  | 24795800  | 2445‡  | 1 |                            |   |
| 7 | 26024193  | 26029813  | 2446‡  | 1 |                            |   |
| 7 | 26996607  | 27001648  | 2448‡  | 1 |                            |   |
| 7 | 29636375  | 29646231  | 2449‡  | 1 |                            |   |
| 7 | 29784992  | 29792474  | 2450‡  | 1 |                            |   |
| 7 | 30480038  | 30484204  | 2452‡  | 1 |                            |   |
| 7 | 30572445  | 30579657  | 2453‡  | 1 |                            |   |
| 7 | 31468030  | 31472374  | 2454‡  | 1 |                            |   |
| 7 | 32832026  | 32843665  | 2457‡  | 1 |                            |   |
| 7 | 33158830  | 33174607  | 2458‡  | 1 |                            |   |
| 7 | 34300137  | 34305572  | 2459‡  | 1 |                            |   |
| 7 | 35696138  | 35697017  | W-106† | 4 |                            |   |
| 7 | 38160250  | 38162742  | 2463‡  | 1 |                            |   |
| 7 | 39753489  | 39764403  | 2466‡  | 1 |                            |   |
| 7 | 40141770  | 40148199  | 2468‡  | 1 |                            |   |
| 7 | 40159746  | 40172712  | 2469‡  | 1 | W-41†                      | 4 |
| 7 | 41547007  | 41559662  | 2471‡  | 1 |                            |   |
| 7 | 42635555  | 42645915  | 2472‡  | 1 |                            |   |
| 7 | 42869813  | 42876404  | 2474‡  | 1 |                            |   |
| 7 | 43810663  | 43821357  | 2477‡  | 1 |                            |   |
| 7 | 43853008  | 43866752  | 2476‡  | 1 |                            |   |
| 7 | 46035743  | 46045152  | 2480‡  | 1 |                            |   |
| 7 | 46461506  | 46471535  | 2482‡  | 1 |                            |   |
| 7 | 47596625  | 47600888  | 2483‡  | 1 |                            |   |
| 7 | 50063166  | 50071022  | 2487‡  | 1 |                            |   |

|   |           |           |              |   |         |   |
|---|-----------|-----------|--------------|---|---------|---|
| 7 | 50569795  | 50583890  | 2489‡        | 1 |         |   |
| 7 | 52334140  | 52340207  | 2492‡        | 1 |         |   |
| 7 | 53896424  | 53909276  | 2495‡        | 1 |         |   |
| 7 | 53955067  | 53962916  | 2496‡        | 1 |         |   |
| 7 | 54449627  | 54453236  | 2498‡        | 1 |         |   |
| 7 | 56145375  | 56149002  | 2500‡        | 1 |         |   |
| 7 | 56317448  | 56325260  | 2501‡        | 1 |         |   |
| 7 | 64679995  | 64686561  | 2518‡        | 1 |         |   |
| 7 | 64834895  | 64840158  | 2519‡        | 1 |         |   |
| 7 | 64945898  | 64951162  | 2522‡        | 1 |         |   |
| 7 | 64990355  | 65006746  | ERV3-1       | 6 |         |   |
| 7 | 65303098  | 65311524  | 2523‡        | 1 |         |   |
| 7 | 65403285  | 65422188  | 2525‡        | 1 |         |   |
| 7 | 75781512  | 75789511  | 2533‡        | 1 |         |   |
| 7 | 77339937  | 77345880  | 2534‡        | 1 |         |   |
| 7 | 82637067  | 82645798  | 2542‡        | 1 |         |   |
| 7 | 83459668  | 83465385  | 2543‡        | 1 |         |   |
| 7 | 85737904  | 85746338  | 2547‡        | 1 |         |   |
| 7 | 86087733  | 86093417  | 2548‡        | 1 |         |   |
| 7 | 87322848  | 87330901  | 2550‡        | 1 |         |   |
| 7 | 88539955  | 88547816  | 2552‡        | 1 |         |   |
| 7 | 91447795  | 91454614  | 2554‡        | 1 |         |   |
| 7 | 92467998  | 92478192  | ERVW-1-2013* | 4 |         |   |
| 7 | 93639935  | 93645553  | 2565‡        | 1 |         |   |
| 7 | 94724235  | 94729309  | 2566‡        | 1 |         |   |
| 7 | 95341846  | 95352435  | 2568‡        | 1 |         |   |
| 7 | 97948903  | 97960343  | 2574‡        | 1 |         |   |
| 7 | 99723172  | 99729894  | 2577‡        | 1 |         |   |
| 7 | 100838697 | 100847199 | 2579‡        | 1 |         |   |
| 7 | 100923784 | 100933639 | 2580‡        | 1 |         |   |
| 7 | 102970588 | 102983136 | 2581‡        | 1 |         |   |
| 7 | 104747921 | 104752819 | K-47**       | 2 | ERVK-14 | 3 |
| 7 | 106527172 | 106533482 | 2585‡        | 1 |         |   |
| 7 | 106829676 | 106838304 | 2587‡        | 1 |         |   |
| 7 | 107093494 | 107108826 | 2589‡        | 1 |         |   |
| 7 | 107383868 | 107391037 | 2590‡        | 1 |         |   |
| 7 | 108339802 | 108343838 | 2592‡        | 1 |         |   |
| 7 | 108669276 | 108676761 | 2593‡        | 1 |         |   |
| 7 | 109299479 | 109309846 | 2594‡        | 1 |         |   |
| 7 | 109591821 | 109597554 | 2595‡        | 1 |         |   |
| 7 | 109789487 | 109802936 | 2596‡        | 1 |         |   |
| 7 | 112641285 | 112656844 | 2598‡        | 1 |         |   |
| 7 | 113231860 | 113239308 | 2599‡        | 1 |         |   |
| 7 | 114379087 | 114386320 | W-42†        | 4 |         |   |
| 7 | 116455724 | 116462379 | 2603‡        | 1 |         |   |
| 7 | 118114164 | 118121690 | 2604‡        | 1 |         |   |
| 7 | 119184157 | 119191167 | 2605‡        | 1 |         |   |
| 7 | 119566444 | 119571926 | 2607‡        | 1 | W-107†  | 4 |
| 7 | 120009179 | 120015801 | 2609‡        | 1 |         |   |
| 7 | 120051512 | 120062744 | 2608‡        | 1 |         |   |
| 7 | 120777789 | 120782720 | 2611‡        | 1 |         |   |
| 7 | 120884897 | 120891241 | 2612‡        | 1 |         |   |
| 7 | 121315380 | 121322301 | 2613‡        | 1 |         |   |

|   |           |           |        |   |                            |   |
|---|-----------|-----------|--------|---|----------------------------|---|
| 7 | 121564821 | 121569265 | 2614‡  | 1 |                            |   |
| 7 | 122171654 | 122177595 | W-108† | 4 |                            |   |
| 7 | 122817181 | 122827713 | 2618‡  | 1 |                            |   |
| 7 | 124729157 | 124735358 | 2620‡  | 1 |                            |   |
| 7 | 124957311 | 124967789 | 2621‡  | 1 |                            |   |
| 7 | 125260115 | 125264637 | 2623‡  | 1 |                            |   |
| 7 | 125309942 | 125313113 | 2624‡  | 1 |                            |   |
| 7 | 125451471 | 125458450 | 2626‡  | 1 |                            |   |
| 7 | 125909965 | 125915741 | 2628‡  | 1 |                            |   |
| 7 | 125916142 | 125924862 | 2627‡  | 1 |                            |   |
| 7 | 129578189 | 129586623 | 2630‡  | 1 |                            |   |
| 7 | 130312378 | 130319950 | 2631‡  | 1 |                            |   |
| 7 | 131820841 | 131824924 | W-43†  | 4 |                            |   |
| 7 | 134548504 | 134558366 | 2636‡  | 1 |                            |   |
| 7 | 134585422 | 134593015 | W-109† | 4 |                            |   |
| 7 | 135174033 | 135184466 | 2637‡  | 1 | ERV3-2, KIAA1466           | 6 |
| 7 | 135320871 | 135324799 | 2639‡  | 1 |                            |   |
| 7 | 136263317 | 136264435 | 2640‡  | 1 |                            |   |
| 7 | 136572740 | 136579526 | 2641‡  | 1 |                            |   |
| 7 | 137262567 | 137268697 | 2643‡  | 1 |                            |   |
| 7 | 138329240 | 138334531 | 2646‡  | 1 |                            |   |
| 7 | 138338786 | 138344410 | 2644‡  | 1 |                            |   |
| 7 | 138364721 | 138369293 | 2645‡  | 1 |                            |   |
| 7 | 138439420 | 138450594 | 2647‡  | 1 |                            |   |
| 7 | 138556758 | 138566149 | 2648‡  | 1 |                            |   |
| 7 | 139001242 | 139007031 | 2649‡  | 1 |                            |   |
| 7 | 139461619 | 139468664 | 2650‡  | 1 |                            |   |
| 7 | 140655492 | 140669521 | 2651‡  | 1 |                            |   |
| 7 | 141575647 | 141584446 | 2653‡  | 1 |                            |   |
| 7 | 141751125 | 141756138 | K-48** | 2 | K(OLDAC004979),<br>ERVK-15 | 3 |
| 7 | 143105117 | 143110504 | 2658‡  | 1 |                            |   |
| 7 | 143537704 | 143543505 | 2662‡  | 1 |                            |   |
| 7 | 143785956 | 143793742 | 2663‡  | 1 |                            |   |
| 7 | 144418957 | 144423209 | 2664‡  | 1 |                            |   |
| 7 | 146050930 | 146058791 | 2666‡  | 1 |                            |   |
| 7 | 146240524 | 146249184 | 2667‡  | 1 |                            |   |
| 7 | 147601205 | 147608955 | 2668‡  | 1 |                            |   |
| 7 | 148306296 | 148315615 | 2670‡  | 1 |                            |   |
| 7 | 149640466 | 149651269 | 2671‡  | 1 |                            |   |
| 7 | 149671596 | 149677221 | W-110† | 4 |                            |   |
| 7 | 150307240 | 150313286 | 2673‡  | 1 |                            |   |
| 7 | 150561605 | 150565847 | 2674‡  | 1 |                            |   |
| 7 | 150583141 | 150609982 | 2675‡  | 1 |                            |   |
| 7 | 152027505 | 152035945 | 2677‡  | 1 |                            |   |
| 7 | 152040019 | 152043289 | 2676‡  | 1 |                            |   |
| 7 | 153405751 | 153413806 | 2679‡  | 1 | ERVFC1-1,<br>envF(c)2      | 6 |
| 7 | 155240046 | 155242738 | 2681‡  | 1 |                            |   |
| 8 | 3235787   | 3243448   | 2683‡  | 1 |                            |   |
| 8 | 5435371   | 5442182   | 2687‡  | 1 |                            |   |
| 8 | 5795687   | 5801952   | 2689‡  | 1 |                            |   |

|   |          |          |          |   |             |   |
|---|----------|----------|----------|---|-------------|---|
| 8 | 5822582  | 5831108  | 2688‡    | 1 |             |   |
| 8 | 5852519  | 5857440  | 2690‡    | 1 |             |   |
| 8 | 5874493  | 5880011  | 2691‡    | 1 |             |   |
| 8 | 6924881  | 6936329  | 2692‡    | 1 |             |   |
| 8 | 7069008  | 7080994  | 2696‡    | 1 |             |   |
| 8 | 7152780  | 7159835  | 2699‡    | 1 |             |   |
| 8 | 7241363  | 7253747  | 2698‡    | 1 |             |   |
| 8 | 7402290  | 7408615  | 2703‡    | 1 |             |   |
| 8 | 7497874  | 7507337  | K-7**    | 2 | K115,ERVK-8 | 3 |
| 8 | 7585833  | 7598268  | 2706‡    | 1 |             |   |
| 8 | 7706518  | 7713055  | 2710‡    | 1 |             |   |
| 8 | 7903215  | 7909304  | 2715‡    | 1 |             |   |
| 8 | 8033825  | 8046265  | 2716‡    | 1 |             |   |
| 8 | 8127799  | 8133981  | 2718‡    | 1 |             |   |
| 8 | 8171833  | 8181319  | 2721‡    | 1 |             |   |
| 8 | 8197177  | 8206699  | K-38**   | 2 | K27         | 3 |
| 8 | 9058881  | 9065201  | 2724‡    | 1 |             |   |
| 8 | 9799847  | 9814148  | 2727‡    | 1 |             |   |
| 8 | 10571064 | 10578532 | 2729‡    | 1 |             |   |
| 8 | 11901864 | 11910668 | 2730‡    | 1 |             |   |
| 8 | 11931842 | 11936717 | 2731‡    | 1 |             |   |
| 8 | 12037972 | 12041523 | 2732‡    | 1 |             |   |
| 8 | 12216469 | 12225829 | 2734‡    | 1 | K(8p23.1d)  | 3 |
| 8 | 12284537 | 12288088 | 2735‡    | 1 |             |   |
| 8 | 12458983 | 12468498 | HERVK-26 | 2 | KOLD130352  | 3 |
| 8 | 12484548 | 12494314 | 2737‡    | 1 | ERVE-3      | 6 |
| 8 | 12688390 | 12691931 | 2741‡    | 1 |             |   |
| 8 | 12706878 | 12713376 | 2740‡    | 1 |             |   |
| 8 | 17907211 | 17916624 | 2744‡    | 1 | K(8q24.3b)  | 3 |
| 8 | 18104719 | 18109311 | 2745‡    | 1 |             |   |
| 8 | 20157536 | 20165620 | 2748‡    | 1 | W-111†      | 4 |
| 8 | 23416108 | 23422118 | 2749‡    | 1 |             |   |
| 8 | 24235765 | 24242893 | 2750‡    | 1 |             |   |
| 8 | 27491923 | 27497770 | 2754‡    | 1 |             |   |
| 8 | 29306712 | 29313100 | 2755‡    | 1 |             |   |
| 8 | 30146006 | 30151857 | 2756‡    | 1 |             |   |
| 8 | 30729085 | 30733486 | 2758‡    | 1 |             |   |
| 8 | 35932083 | 35939163 | 2761‡    | 1 |             |   |
| 8 | 35951599 | 35960032 | 2763‡    | 1 |             |   |
| 8 | 36459509 | 36471815 | 2764‡    | 1 |             |   |
| 8 | 37996558 | 38004368 | 2765‡    | 1 |             |   |
| 8 | 38081999 | 38091940 | 2766‡    | 1 |             |   |
| 8 | 39478337 | 39487862 | 2770‡    | 1 |             |   |
| 8 | 39846611 | 39853011 | 2773‡    | 1 |             |   |
| 8 | 39876226 | 39885447 | 2772‡    | 1 |             |   |
| 8 | 41590933 | 41598326 | 2776‡    | 1 |             |   |
| 8 | 42559883 | 42568267 | 2777‡    | 1 |             |   |
| 8 | 43551325 | 43561237 | 2781‡    | 1 |             |   |
| 8 | 43694279 | 43702581 | 2782‡    | 1 |             |   |
| 8 | 43882270 | 43886722 | 2787‡    | 1 |             |   |
| 8 | 43892849 | 43898868 | 2788‡    | 1 |             |   |
| 8 | 46264027 | 46272039 | K-62**   | 2 | K70,K43     | 3 |
| 8 | 46278031 | 46285062 | 2793‡    | 1 |             |   |

|   |          |          |         |   |         |   |
|---|----------|----------|---------|---|---------|---|
| 8 | 46481068 | 46494142 | 2795‡   | 1 |         |   |
| 8 | 46580574 | 46589401 | 2797‡   | 1 |         |   |
| 8 | 46651494 | 46655372 | 2798‡   | 1 |         |   |
| 8 | 46876732 | 46882691 | 2800‡   | 1 |         |   |
| 8 | 47989117 | 47999250 | 2804‡   | 1 |         |   |
| 8 | 48232826 | 48242753 | 2807‡   | 1 |         |   |
| 8 | 48244515 | 48250517 | 2806‡   | 1 |         |   |
| 8 | 48962289 | 48966436 | 2809‡   | 1 |         |   |
| 8 | 49094700 | 49104433 | 2812‡   | 1 |         |   |
| 8 | 49419758 | 49426333 | 2814‡   | 1 |         |   |
| 8 | 49427136 | 49435527 | 2813‡   | 1 |         |   |
| 8 | 49649765 | 49656979 | 2815‡   | 1 |         |   |
| 8 | 51288815 | 51299170 | 2817‡   | 1 |         |   |
| 8 | 52954385 | 52962576 | 2819‡   | 1 |         |   |
| 8 | 52980995 | 52983546 | 2820‡   | 1 |         |   |
| 8 | 53068948 | 53077280 | 2821‡   | 1 |         |   |
| 8 | 53136330 | 53143376 | 2822‡   | 1 |         |   |
| 8 | 53367143 | 53379617 | 2823‡   | 1 |         |   |
| 8 | 53435276 | 53443086 | 2825‡   | 1 |         |   |
| 8 | 53459437 | 53468954 | 2824‡   | 1 |         |   |
| 8 | 53482831 | 53488850 | 2826‡   | 1 |         |   |
| 8 | 53617095 | 53624085 | 2827‡   | 1 |         |   |
| 8 | 53731264 | 53737231 | 2828‡   | 1 |         |   |
| 8 | 54070288 | 54074793 | 2829‡   | 1 |         |   |
| 8 | 55706202 | 55715876 | 2830‡   | 1 |         |   |
| 8 | 57456589 | 57462356 | 2832‡   | 1 |         |   |
| 8 | 59778044 | 59788481 | 2836‡   | 1 |         |   |
| 8 | 60305358 | 60312325 | 2837‡   | 1 |         |   |
| 8 | 60419413 | 60425519 | W-44†   | 4 |         |   |
| 8 | 60493461 | 60499925 | 2839‡   | 1 |         |   |
| 8 | 63143705 | 63154359 | 2841‡   | 1 |         |   |
| 8 | 63919655 | 63925770 | 2844‡   | 1 |         |   |
| 8 | 64121553 | 64127799 | 2845‡   | 1 |         |   |
| 8 | 64764926 | 64777239 | 2846‡   | 1 | W-112†  | 4 |
| 8 | 65120223 | 65133148 | 2847‡   | 1 |         |   |
| 8 | 65863235 | 65870470 | 2848‡   | 1 |         |   |
| 8 | 67703008 | 67709671 | 2849‡   | 1 |         |   |
| 8 | 67921962 | 67923631 | W-113†  | 4 |         |   |
| 8 | 68888779 | 68895390 | 2850‡   | 1 |         |   |
| 8 | 68971413 | 68977964 | 2852‡   | 1 |         |   |
| 8 | 71664665 | 71670450 | 2855‡   | 1 |         |   |
| 8 | 71674937 | 71683238 | 2856‡   | 1 |         |   |
| 8 | 72096360 | 72104776 | 2858‡   | 1 |         |   |
| 8 | 72387849 | 72395578 | 2860‡   | 1 |         |   |
| 8 | 73821864 | 73822603 | ERVW-20 | 4 |         |   |
| 8 | 73906200 | 73914015 | 2862‡   | 1 |         |   |
| 8 | 75044837 | 75048174 | 2863‡   | 1 |         |   |
| 8 | 78155679 | 78162935 | 2864‡   | 1 |         |   |
| 8 | 78183500 | 78187877 | 2865‡   | 1 |         |   |
| 8 | 78644761 | 78654091 | 2866‡   | 1 |         |   |
| 8 | 79386104 | 79391685 | 2867‡   | 1 |         |   |
| 8 | 80739764 | 80744514 | 2869‡   | 1 | ERVW-21 | 4 |
| 8 | 81898016 | 81903943 | 2872‡   | 1 |         |   |



|   |           |           |       |   |             |   |
|---|-----------|-----------|-------|---|-------------|---|
| 8 | 81913874  | 81918742  | 2871‡ | 1 |             |   |
| 8 | 83063601  | 83073894  | 2873‡ | 1 |             |   |
| 8 | 83505870  | 83510773  | 2876‡ | 1 |             |   |
| 8 | 83543696  | 83550628  | 2875‡ | 1 |             |   |
| 8 | 84637447  | 84644157  | 2878‡ | 1 |             |   |
| 8 | 85062831  | 85069150  | 2879‡ | 1 |             |   |
| 8 | 86924785  | 86935729  | 2885‡ | 1 |             |   |
| 8 | 87044384  | 87055688  | 2886‡ | 1 |             |   |
| 8 | 88608069  | 88611504  | 2890‡ | 1 |             |   |
| 8 | 88741993  | 88749018  | 2891‡ | 1 |             |   |
| 8 | 89448803  | 89455243  | 2895‡ | 1 |             |   |
| 8 | 90089333  | 90095881  | 2897‡ | 1 |             |   |
| 8 | 90409686  | 90416535  | 2898‡ | 1 |             |   |
| 8 | 91947467  | 91957477  | 2899‡ | 1 |             |   |
| 8 | 92236543  | 92242718  | 2900‡ | 1 |             |   |
| 8 | 92364326  | 92382034  | 2902‡ | 1 |             |   |
| 8 | 92393439  | 92401145  | 2903‡ | 1 |             |   |
| 8 | 94321405  | 94330623  | 2907‡ | 1 |             |   |
| 8 | 97175022  | 97180753  | 2909‡ | 1 |             |   |
| 8 | 97200740  | 97206678  | 2910‡ | 1 |             |   |
| 8 | 97827598  | 97835617  | 2912‡ | 1 |             |   |
| 8 | 99943682  | 99949604  | 2914‡ | 1 | ERVH 8q22.2 | 5 |
| 8 | 102979373 | 102991718 | 2916‡ | 1 |             |   |
| 8 | 104285906 | 104292093 | 2917‡ | 1 |             |   |
| 8 | 106788829 | 106794857 | 2921‡ | 1 |             |   |
| 8 | 107597656 | 107606881 | 2924‡ | 1 |             |   |
| 8 | 109301077 | 109307459 | 2926‡ | 1 |             |   |
| 8 | 112195983 | 112201388 | 2930‡ | 1 |             |   |
| 8 | 113470200 | 113481302 | 2932‡ | 1 |             |   |
| 8 | 113510722 | 113516422 | 2933‡ | 1 |             |   |
| 8 | 113517528 | 113527194 | 2934‡ | 1 |             |   |
| 8 | 114240168 | 114249751 | 2938‡ | 1 |             |   |
| 8 | 114281593 | 114286513 | 2937‡ | 1 |             |   |
| 8 | 114895778 | 114903066 | 2939‡ | 1 |             |   |
| 8 | 115212253 | 115218202 | 2940‡ | 1 |             |   |
| 8 | 115813182 | 115817981 | 2941‡ | 1 |             |   |
| 8 | 119873659 | 119878636 | 2946‡ | 1 |             |   |
| 8 | 122830089 | 122836718 | 2948‡ | 1 |             |   |
| 8 | 124899764 | 124907226 | W-45† | 4 |             |   |
| 8 | 125987127 | 125994738 | 2952‡ | 1 |             |   |
| 8 | 126008502 | 126012155 | 2953‡ | 1 |             |   |
| 8 | 127431701 | 127440906 | 2955‡ | 1 |             |   |
| 8 | 128608695 | 128617636 | 2957‡ | 1 |             |   |
| 8 | 128914435 | 128920317 | 2959‡ | 1 |             |   |
| 8 | 131309579 | 131316268 | 2962‡ | 1 |             |   |
| 8 | 131740745 | 131747161 | 2963‡ | 1 |             |   |
| 8 | 131820835 | 131826284 | 2964‡ | 1 |             |   |
| 8 | 132075615 | 132086002 | 2965‡ | 1 |             |   |
| 8 | 135767175 | 135773027 | 2966‡ | 1 |             |   |
| 8 | 136909866 | 136911774 | 2969‡ | 1 |             |   |
| 8 | 137283125 | 137286924 | 2970‡ | 1 |             |   |
| 8 | 137409565 | 137414548 | 2971‡ | 1 |             |   |
| 8 | 137824631 | 137830449 | 2972‡ | 1 |             |   |

|   |           |           |         |   |                    |     |
|---|-----------|-----------|---------|---|--------------------|-----|
| 8 | 139459107 | 139470560 | 2976‡   | 1 | K-74**, K(9q34.11) | 2,3 |
| 8 | 139546900 | 139550371 | 2977‡   | 1 |                    |     |
| 8 | 142720778 | 142724571 | 2978‡   | 1 |                    |     |
| 8 | 144858915 | 144868670 | 2982‡   | 1 |                    |     |
| 8 | 144871551 | 144877827 | 2981‡   | 1 |                    |     |
| 8 | 144955095 | 144959802 | 2983‡   | 1 |                    |     |
| 8 | 145021244 | 145028842 | 2985‡   | 1 | K-61**, K29        | 2,3 |
| 8 | 145028946 | 145032162 | 2986‡   | 1 |                    |     |
| 8 | 145055669 | 145066696 | 2984‡   | 1 |                    |     |
| 9 | 2275784   | 2281525   | 2989‡   | 1 |                    |     |
| 9 | 2509233   | 2514932   | 2991‡   | 1 |                    |     |
| 9 | 3809395   | 3816769   | 2993‡   | 1 |                    |     |
| 9 | 6078721   | 6087859   | 2997‡   | 1 |                    |     |
| 9 | 7785527   | 7791624   | 2998‡   | 1 |                    |     |
| 9 | 8747223   | 8748523   | W-114†  | 4 |                    |     |
| 9 | 10884595  | 10889539  | 3002‡   | 1 |                    |     |
| 9 | 11253556  | 11261878  | 3003‡   | 1 |                    |     |
| 9 | 12166461  | 12176163  | 3004‡   | 1 |                    |     |
| 9 | 12948345  | 12954652  | 3005‡   | 1 |                    |     |
| 9 | 21922276  | 21931725  | 3016‡   | 1 |                    |     |
| 9 | 22434277  | 22441741  | 3017‡   | 1 |                    |     |
| 9 | 22658534  | 22664085  | 3018‡   | 1 |                    |     |
| 9 | 22823029  | 22823839  | W-115†  | 4 |                    |     |
| 9 | 23916360  | 23925590  | 3020‡   | 1 |                    |     |
| 9 | 25288289  | 25294098  | 3024‡   | 1 |                    |     |
| 9 | 25668975  | 25675214  | 3025‡   | 1 |                    |     |
| 9 | 25994624  | 26001365  | 3026‡   | 1 |                    |     |
| 9 | 26102945  | 26109673  | 3027‡   | 1 |                    |     |
| 9 | 26826000  | 26831465  | 3030‡   | 1 |                    |     |
| 9 | 26970921  | 26978133  | 3031‡   | 1 |                    |     |
| 9 | 27637116  | 27643620  | 3032‡   | 1 |                    |     |
| 9 | 27779119  | 27795568  | 3033‡   | 1 |                    |     |
| 9 | 29377368  | 29384677  | 3035‡   | 1 |                    |     |
| 9 | 29651712  | 29660163  | 3037‡   | 1 |                    |     |
| 9 | 29775513  | 29780684  | 3038‡   | 1 |                    |     |
| 9 | 31326353  | 31334694  | 3042‡   | 1 |                    |     |
| 9 | 31772326  | 31777713  | 3043‡   | 1 |                    |     |
| 9 | 32162650  | 32168564  | 3046‡   | 1 |                    |     |
| 9 | 35003408  | 35011008  | 3050‡   | 1 |                    |     |
| 9 | 35019246  | 35025461  | 3052‡   | 1 |                    |     |
| 9 | 35455417  | 35462089  | 3054‡   | 1 |                    |     |
| 9 | 35582348  | 35587799  | 3055‡   | 1 |                    |     |
| 9 | 35640304  | 35642827  | ERVW-22 | 4 |                    |     |
| 9 | 40310106  | 40316283  | 3058‡   | 1 |                    |     |
| 9 | 40747006  | 40755329  | 3064‡   | 1 |                    |     |
| 9 | 64870613  | 64878934  | 3066‡   | 1 |                    |     |
| 9 | 69404567  | 69410279  | 3068‡   | 1 |                    |     |
| 9 | 69925404  | 69933937  | 3069‡   | 1 |                    |     |
| 9 | 74085787  | 74093802  | 3070‡   | 1 |                    |     |
| 9 | 75351158  | 75357591  | 3072‡   | 1 |                    |     |
| 9 | 76488302  | 76495692  | 3074‡   | 1 |                    |     |
| 9 | 78180694  | 78186820  | 3076‡   | 1 |                    |     |

|   |           |           |        |   |             |     |
|---|-----------|-----------|--------|---|-------------|-----|
| 9 | 78431300  | 78443032  | 3078‡  | 1 |             |     |
| 9 | 80137336  | 80145478  | 3081‡  | 1 |             |     |
| 9 | 81009358  | 81015277  | 3083‡  | 1 |             |     |
| 9 | 82699680  | 82706383  | 3085‡  | 1 |             |     |
| 9 | 82883729  | 82891699  | 3087‡  | 1 |             |     |
| 9 | 85370138  | 85376650  | 3088‡  | 1 |             |     |
| 9 | 85458366  | 85466868  | 3089‡  | 1 |             |     |
| 9 | 85880976  | 85886282  | 3090‡  | 1 |             |     |
| 9 | 86147196  | 86163550  | 3092‡  | 1 |             |     |
| 9 | 86362963  | 86367512  | 3093‡  | 1 |             |     |
| 9 | 87410327  | 87422073  | 3095‡  | 1 |             |     |
| 9 | 88037092  | 88044802  | 3097‡  | 1 | ERVI-1      | 6   |
| 9 | 88933270  | 88943967  | 3099‡  | 1 | W-46†       | 4   |
| 9 | 90223853  | 90227706  | 3100‡  | 1 |             |     |
| 9 | 90412919  | 90418687  | 3101‡  | 1 |             |     |
| 9 | 90672292  | 90681019  | 3102‡  | 1 |             |     |
| 9 | 90753622  | 90759367  | 3103‡  | 1 |             |     |
| 9 | 90903904  | 90911679  | 3104‡  | 1 |             |     |
| 9 | 91980558  | 91982077  | W-116† | 4 |             |     |
| 9 | 92071888  | 92078398  | 3107‡  | 1 |             |     |
| 9 | 93347572  | 93353337  | 3109‡  | 1 |             |     |
| 9 | 93751064  | 93755813  | 3110‡  | 1 |             |     |
| 9 | 94266124  | 94270214  | 3112‡  | 1 |             |     |
| 9 | 94539871  | 94545510  | 3113‡  | 1 |             |     |
| 9 | 97214681  | 97220761  | 3118‡  | 1 |             |     |
| 9 | 98266814  | 98271182  | 3120‡  | 1 |             |     |
| 9 | 99669767  | 99675898  | 3122‡  | 1 |             |     |
| 9 | 100139459 | 100146544 | 3123‡  | 1 |             |     |
| 9 | 100363123 | 100367718 | 3126‡  | 1 |             |     |
| 9 | 101504248 | 101512597 | 3129‡  | 1 |             |     |
| 9 | 106039739 | 106043928 | 3136‡  | 1 |             |     |
| 9 | 106787507 | 106792984 | 3138‡  | 1 |             |     |
| 9 | 108792594 | 108800781 | 3142‡  | 1 |             |     |
| 9 | 111336412 | 111338179 | W-117† | 4 |             |     |
| 9 | 112391941 | 112399397 | 3145‡  | 1 |             |     |
| 9 | 115172465 | 115180335 | 3149‡  | 1 |             |     |
| 9 | 115473181 | 115479707 | 3150‡  | 1 |             |     |
| 9 | 115839177 | 115844929 | 3151‡  | 1 |             |     |
| 9 | 118485631 | 118491397 | 3155‡  | 1 |             |     |
| 9 | 121789977 | 121796727 | 3156‡  | 1 |             |     |
| 9 | 122530593 | 122536151 | 3158‡  | 1 |             |     |
| 9 | 126075621 | 126080744 | 3162‡  | 1 |             |     |
| 9 | 128850235 | 128857457 | K-60** | 2 | K31         | 3   |
| 9 | 129587224 | 129596563 | 3165‡  | 1 |             |     |
| 9 | 131546099 | 131553142 | 3166‡  | 1 |             |     |
| 9 | 131680373 | 131686728 | 3167‡  | 1 |             |     |
| 9 | 133031013 | 133037385 | 3170‡  | 1 |             |     |
| 9 | 133076137 | 133085152 | 3171‡  | 1 |             |     |
| 9 | 133170965 | 133182558 | 3172‡  | 1 |             |     |
| 9 | 133277826 | 133281033 | 3173‡  | 1 |             |     |
| 9 | 134924094 | 134928770 | 3175‡  | 1 |             |     |
| 9 | 135437307 | 135444509 | 3176‡  | 1 |             |     |
| 9 | 136780314 | 136789786 | 3177‡  | 1 | K-43**, K30 | 2,3 |

|    |           |           |        |   |                         |   |
|----|-----------|-----------|--------|---|-------------------------|---|
| 9  | 137844214 | 137849562 | 3178‡  | 1 |                         |   |
| 10 | 1349131   | 1355487   | 3180‡  | 1 |                         |   |
| 10 | 3393039   | 3402593   | K-50** | 2 |                         |   |
| 10 | 4948035   | 4956078   | 3182‡  | 1 |                         |   |
| 10 | 5036660   | 5038242   | 3185‡  | 1 |                         |   |
| 10 | 5038323   | 5047524   | 3183‡  | 1 |                         |   |
| 10 | 5054447   | 5060768   | 3184‡  | 1 |                         |   |
| 10 | 5470768   | 5479733   | 3187‡  | 1 |                         |   |
| 10 | 5863493   | 5868824   | 3189‡  | 1 |                         |   |
| 10 | 6629619   | 6635541   | 3191‡  | 1 |                         |   |
| 10 | 6796052   | 6802953   | 3193‡  | 1 |                         |   |
| 10 | 6824178   | 6833641   | K-22** | 2 | ERVK-16,<br>K(C11a),K33 | 3 |
| 10 | 14984386  | 14998891  | 3194‡  | 1 |                         |   |
| 10 | 15011465  | 15019215  | 3196‡  | 1 |                         |   |
| 10 | 17010207  | 17018765  | 3199‡  | 1 |                         |   |
| 10 | 18570092  | 18577466  | 3200‡  | 1 |                         |   |
| 10 | 20118010  | 20124934  | 3203‡  | 1 |                         |   |
| 10 | 22138953  | 22146515  | 3204‡  | 1 |                         |   |
| 10 | 23296191  | 23302161  | W-47†  | 4 |                         |   |
| 10 | 25716397  | 25722923  | 3209‡  | 1 |                         |   |
| 10 | 26988117  | 26999252  | 3213‡  | 1 |                         |   |
| 10 | 27465310  | 27470939  | 3215‡  | 1 | ERVH-5                  | 6 |
| 10 | 34968862  | 34975636  | 3221‡  | 1 |                         |   |
| 10 | 35403060  | 35410120  | 3222‡  | 1 |                         |   |
| 10 | 37275064  | 37285018  | 3224‡  | 1 |                         |   |
| 10 | 37937012  | 37944189  | 3226‡  | 1 |                         |   |
| 10 | 42384092  | 42393490  | 3231‡  | 1 |                         |   |
| 10 | 42486651  | 42494526  | 3232‡  | 1 |                         |   |
| 10 | 42494899  | 42500281  | 3233‡  | 1 |                         |   |
| 10 | 42504684  | 42509581  | 3234‡  | 1 |                         |   |
| 10 | 42645191  | 42654770  | 3236‡  | 1 |                         |   |
| 10 | 43293134  | 43300924  | 3238‡  | 1 |                         |   |
| 10 | 43583464  | 43596633  | 3241‡  | 1 |                         |   |
| 10 | 45279082  | 45286905  | 3244‡  | 1 |                         |   |
| 10 | 45571382  | 45577314  | 3245‡  | 1 |                         |   |
| 10 | 48990943  | 48997767  | 3247‡  | 1 |                         |   |
| 10 | 52028738  | 52039561  | 3250‡  | 1 |                         |   |
| 10 | 52946452  | 52955993  | 3253‡  | 1 |                         |   |
| 10 | 53021994  | 53030667  | 3254‡  | 1 |                         |   |
| 10 | 53337557  | 53340577  | 3255‡  | 1 |                         |   |
| 10 | 53490062  | 53504727  | 3256‡  | 1 |                         |   |
| 10 | 54166659  | 54172498  | 3257‡  | 1 |                         |   |
| 10 | 54295302  | 54301207  | 3258‡  | 1 |                         |   |
| 10 | 55971710  | 55976876  | 3261‡  | 1 |                         |   |
| 10 | 56571434  | 56578736  | 3263‡  | 1 |                         |   |
| 10 | 57832460  | 57841780  | 3269‡  | 1 |                         |   |
| 10 | 58860993  | 58867331  | 3274‡  | 1 |                         |   |
| 10 | 59726523  | 59733738  | 3275‡  | 1 |                         |   |
| 10 | 61030615  | 61039899  | 3276‡  | 1 | W-48†                   | 4 |
| 10 | 63848212  | 63851581  | 3279‡  | 1 |                         |   |
| 10 | 64044745  | 64045616  | W-118† | 4 |                         |   |
| 10 | 64776825  | 64785965  | 3283‡  | 1 |                         |   |

|    |           |           |       |   |                           |     |
|----|-----------|-----------|-------|---|---------------------------|-----|
| 10 | 65107492  | 65112804  | 3284‡ | 1 |                           |     |
| 10 | 67683765  | 67690648  | 3286‡ | 1 |                           |     |
| 10 | 68861132  | 68868373  | 3288‡ | 1 |                           |     |
| 10 | 71015035  | 71021725  | 3289‡ | 1 |                           |     |
| 10 | 71939375  | 71946508  | 3291‡ | 1 |                           |     |
| 10 | 71949659  | 71955051  | 3290‡ | 1 |                           |     |
| 10 | 71957694  | 71961280  | 3292‡ | 1 |                           |     |
| 10 | 74775648  | 74785136  | 3294‡ | 1 |                           |     |
| 10 | 76818221  | 76826759  | 3297‡ | 1 |                           |     |
| 10 | 79604769  | 79608013  | 3300‡ | 1 |                           |     |
| 10 | 80104701  | 80116174  | 3301‡ | 1 |                           |     |
| 10 | 80738638  | 80748037  | 3302‡ | 1 |                           |     |
| 10 | 83057508  | 83063365  | 3305‡ | 1 |                           |     |
| 10 | 83218468  | 83220764  | 3306‡ | 1 |                           |     |
| 10 | 84108765  | 84117193  | 3307‡ | 1 |                           |     |
| 10 | 84118568  | 84126316  | 3308‡ | 1 |                           |     |
| 10 | 84525370  | 84531069  | W-49† | 4 |                           |     |
| 10 | 85393206  | 85405011  | 3313‡ | 1 |                           |     |
| 10 | 85595183  | 85606011  | 3314‡ | 1 |                           |     |
| 10 | 86635827  | 86644397  | 3315‡ | 1 |                           |     |
| 10 | 89284720  | 89291763  | 3316‡ | 1 |                           |     |
| 10 | 89406288  | 89417471  | 3317‡ | 1 |                           |     |
| 10 | 90080051  | 90086792  | 3318‡ | 1 |                           |     |
| 10 | 90135149  | 90145087  | 3319‡ | 1 |                           |     |
| 10 | 90294974  | 90300740  | 3320‡ | 1 |                           |     |
| 10 | 90807288  | 90814529  | 3321‡ | 1 |                           |     |
| 10 | 91300602  | 91307220  | 3322‡ | 1 |                           |     |
| 10 | 94384518  | 94392369  | 3323‡ | 1 |                           |     |
| 10 | 94763898  | 94773993  | 3326‡ | 1 |                           |     |
| 10 | 94834568  | 94841534  | W-50† | 4 |                           |     |
| 10 | 94991561  | 94998797  | 3328‡ | 1 |                           |     |
| 10 | 95717358  | 95724870  | W-51† | 4 |                           |     |
| 10 | 96731990  | 96738173  | 3334‡ | 1 |                           |     |
| 10 | 97555739  | 97561771  | 3335‡ | 1 |                           |     |
| 10 | 99258162  | 99268781  | 3339‡ | 1 |                           |     |
| 10 | 99298197  | 99303580  | 3338‡ | 1 |                           |     |
| 10 | 99818702  | 99827957  | 3340‡ | 1 | K-24**,<br>ERVK-17, c10_B | 2,3 |
| 10 | 100380920 | 100388398 | 3341‡ | 1 |                           |     |
| 10 | 101184273 | 101189595 | 3342‡ | 1 |                           |     |
| 10 | 102836000 | 102844467 | 3344‡ | 1 |                           |     |
| 10 | 103205480 | 103213543 | 3346‡ | 1 |                           |     |
| 10 | 106016755 | 106023057 | 3349‡ | 1 |                           |     |
| 10 | 106269627 | 106274410 | 3350‡ | 1 |                           |     |
| 10 | 108111050 | 108125395 | 3351‡ | 1 |                           |     |
| 10 | 108729222 | 108732968 | 3353‡ | 1 |                           |     |
| 10 | 109041195 | 109049070 | 3355‡ | 1 |                           |     |
| 10 | 109562027 | 109566800 | 3358‡ | 1 |                           |     |
| 10 | 116480661 | 116486535 | 3363‡ | 1 |                           |     |
| 10 | 116490676 | 116503152 | 3364‡ | 1 |                           |     |
| 10 | 118608811 | 118614286 | 3365‡ | 1 |                           |     |
| 10 | 118889782 | 118904747 | 3366‡ | 1 |                           |     |
| 10 | 119883735 | 119890745 | 3367‡ | 1 |                           |     |

|    |           |           |       |   |         |   |
|----|-----------|-----------|-------|---|---------|---|
| 10 | 120844913 | 120851580 | 3370‡ | 1 |         |   |
| 10 | 123814109 | 123820319 | 3371‡ | 1 |         |   |
| 10 | 130292253 | 130295850 | 3372‡ | 1 |         |   |
| 10 | 133603584 | 133609809 | 3375‡ | 1 |         |   |
| 11 | 3447426   | 3456906   | 3379‡ | 1 | K7      | 3 |
| 11 | 3473020   | 3482099   | 3380‡ | 1 |         |   |
| 11 | 3509346   | 3516789   | 3382‡ | 1 |         |   |
| 11 | 3647990   | 3653629   | 3383‡ | 1 |         |   |
| 11 | 4220577   | 4226739   | 3385‡ | 1 |         |   |
| 11 | 4317217   | 4323342   | 3386‡ | 1 |         |   |
| 11 | 4454469   | 4464776   | 3387‡ | 1 |         |   |
| 11 | 4495395   | 4498723   | 3388‡ | 1 |         |   |
| 11 | 5159270   | 5167133   | 3389‡ | 1 |         |   |
| 11 | 5928629   | 5938951   | 3392‡ | 1 |         |   |
| 11 | 6069106   | 6075893   | 3393‡ | 1 |         |   |
| 11 | 6366028   | 6374896   | 3394‡ | 1 |         |   |
| 11 | 6747292   | 6754907   | 3395‡ | 1 |         |   |
| 11 | 7513515   | 7520474   | 3397‡ | 1 |         |   |
| 11 | 7898106   | 7906049   | 3400‡ | 1 | ERVK3-4 | 6 |
| 11 | 7911613   | 7917907   | 3401‡ | 1 |         |   |
| 11 | 9347805   | 9349617   | W-52† | 4 |         |   |
| 11 | 10004937  | 10020706  | 3403‡ | 1 |         |   |
| 11 | 13471906  | 13474785  | 3405‡ | 1 |         |   |
| 11 | 14524558  | 14527625  | 3406‡ | 1 |         |   |
| 11 | 15011625  | 15027098  | 3408‡ | 1 |         |   |
| 11 | 15064020  | 15068599  | 3407‡ | 1 |         |   |
| 11 | 17370180  | 17379293  | 3409‡ | 1 |         |   |
| 11 | 18641822  | 18648047  | 3411‡ | 1 |         |   |
| 11 | 20567855  | 20578780  | 3413‡ | 1 |         |   |
| 11 | 22312818  | 22318319  | W-68† | 4 |         |   |
| 11 | 22992705  | 23000627  | 3415‡ | 1 |         |   |
| 11 | 23183937  | 23189778  | 3417‡ | 1 |         |   |
| 11 | 23882493  | 23892875  | 3421‡ | 1 |         |   |
| 11 | 23934053  | 23942201  | 3420‡ | 1 |         |   |
| 11 | 25000042  | 25007141  | 3422‡ | 1 |         |   |
| 11 | 25326414  | 25329380  | 3423‡ | 1 |         |   |
| 11 | 25486272  | 25496072  | 3425‡ | 1 |         |   |
| 11 | 26002001  | 26007253  | 3427‡ | 1 |         |   |
| 11 | 26590430  | 26597675  | W-53† | 4 |         |   |
| 11 | 27629075  | 27634939  | 3430‡ | 1 |         |   |
| 11 | 29518607  | 29527572  | 3431‡ | 1 |         |   |
| 11 | 29973531  | 29980290  | 3432‡ | 1 |         |   |
| 11 | 31608175  | 31609536  | 3433‡ | 1 |         |   |
| 11 | 32145164  | 32153379  | 3434‡ | 1 |         |   |
| 11 | 34897254  | 34907021  | 3436‡ | 1 |         |   |
| 11 | 37576826  | 37582979  | 3439‡ | 1 |         |   |
| 11 | 38111202  | 38120534  | 3441‡ | 1 |         |   |
| 11 | 38221194  | 38227007  | 3442‡ | 1 |         |   |
| 11 | 38601580  | 38612336  | 3443‡ | 1 | W-119†  | 4 |
| 11 | 39125661  | 39132397  | 3445‡ | 1 |         |   |
| 11 | 39560282  | 39567337  | 3448‡ | 1 |         |   |
| 11 | 39734119  | 39741059  | 3449‡ | 1 |         |   |
| 11 | 42119616  | 42125323  | 3451‡ | 1 |         |   |

|    |          |          |          |   |                    |     |
|----|----------|----------|----------|---|--------------------|-----|
| 11 | 42874521 | 42883904 | 3452‡    | 1 |                    |     |
| 11 | 43160659 | 43172407 | 3456‡    | 1 |                    |     |
| 11 | 43179098 | 43187107 | 3458‡    | 1 |                    |     |
| 11 | 44544325 | 44550785 | 3459‡    | 1 |                    |     |
| 11 | 48333403 | 48340053 | 3461‡    | 1 |                    |     |
| 11 | 49320166 | 49326841 | 3466‡    | 1 |                    |     |
| 11 | 49735085 | 49743469 | 3468‡    | 1 |                    |     |
| 11 | 49994478 | 50001406 | 3470‡    | 1 |                    |     |
| 11 | 50434164 | 50448906 | 3471‡    | 1 |                    |     |
| 11 | 50486075 | 50493612 | 3473‡    | 1 |                    |     |
| 11 | 50629209 | 50638244 | 3475‡    | 1 |                    |     |
| 11 | 54758826 | 54766172 | 3478‡    | 1 |                    |     |
| 11 | 55458871 | 55475226 | 3490‡    | 1 |                    |     |
| 11 | 55501739 | 55505405 | 3489‡    | 1 |                    |     |
| 11 | 55558476 | 55564110 | 3492‡    | 1 |                    |     |
| 11 | 55577084 | 55586433 | 3491‡    | 1 |                    |     |
| 11 | 56328003 | 56330869 | 3495‡    | 1 |                    |     |
| 11 | 56949125 | 56952537 | 3498‡    | 1 |                    |     |
| 11 | 56996962 | 57000931 | 3497‡    | 1 |                    |     |
| 11 | 58769831 | 58777331 | 3503‡    | 1 |                    |     |
| 11 | 58996951 | 59006462 | 3505‡    | 1 | K-67**, K(11q12.3) | 2,3 |
| 11 | 59400534 | 59410233 | 3506‡    | 1 |                    |     |
| 11 | 59923928 | 59931395 | 3508‡    | 1 |                    |     |
| 11 | 60101584 | 60108947 | 3509‡    | 1 |                    |     |
| 11 | 60185435 | 60193210 | 3510‡    | 1 |                    |     |
| 11 | 60215182 | 60225509 | 3511‡    | 1 |                    |     |
| 11 | 60756556 | 60763065 | 3512‡    | 1 |                    |     |
| 11 | 61093578 | 61099813 | 3513‡    | 1 |                    |     |
| 11 | 62047464 | 62057717 | 3514‡    | 1 |                    |     |
| 11 | 62252711 | 62264351 | 3516‡    | 1 |                    |     |
| 11 | 62368490 | 62383091 | HERVK-27 | 2 | K(OLDAC004127)     | 3   |
| 11 | 63209496 | 63215272 | 3518‡    | 1 |                    |     |
| 11 | 63452680 | 63459317 | 3520‡    | 1 |                    |     |
| 11 | 66573821 | 66581258 | 3521‡    | 1 |                    |     |
| 11 | 67619701 | 67626914 | 3522‡    | 1 | ERV9-1             | 6   |
| 11 | 67685112 | 67694396 | 3525‡    | 1 |                    |     |
| 11 | 67701771 | 67705294 | 3524‡    | 1 |                    |     |
| 11 | 67726809 | 67731587 | 3523‡    | 1 |                    |     |
| 11 | 67759689 | 67765370 | 3526‡    | 1 |                    |     |
| 11 | 67845549 | 67851894 | 3527‡    | 1 | ERVE-2             | 6   |
| 11 | 67882044 | 67889510 | 3528‡    | 1 |                    |     |
| 11 | 67978502 | 67982041 | 3529‡    | 1 |                    |     |
| 11 | 68622945 | 68634155 | 3530‡    | 1 |                    |     |
| 11 | 68867423 | 68874590 | 3533‡    | 1 |                    |     |
| 11 | 70209638 | 70220000 | 3537‡    | 1 |                    |     |
| 11 | 71586230 | 71591666 | 3539‡    | 1 |                    |     |
| 11 | 71612092 | 71615634 | 3540‡    | 1 |                    |     |
| 11 | 71705991 | 71714722 | 3543‡    | 1 |                    |     |
| 11 | 71740712 | 71749874 | 3542‡    | 1 |                    |     |
| 11 | 71764073 | 71767231 | K-51**   | 2 |                    |     |
| 11 | 71885996 | 71891736 | 3544‡    | 1 |                    |     |
| 11 | 71908145 | 71917331 | 3545‡    | 1 |                    |     |

|    |           |           |       |   |                              |   |
|----|-----------|-----------|-------|---|------------------------------|---|
| 11 | 73939029  | 73947458  | 3546‡ | 1 |                              |   |
| 11 | 74869434  | 74884487  | 3547‡ | 1 |                              |   |
| 11 | 75039916  | 75047153  | 3548‡ | 1 |                              |   |
| 11 | 77548980  | 77563052  | 3550‡ | 1 |                              |   |
| 11 | 77569937  | 77574938  | 3551‡ | 1 |                              |   |
| 11 | 77856368  | 77862982  | 3552‡ | 1 | ERVW-6-2013*                 | 4 |
| 11 | 78080836  | 78089728  | 3553‡ | 1 |                              |   |
| 11 | 79126913  | 79138689  | 3555‡ | 1 |                              |   |
| 11 | 81032727  | 81040218  | 3557‡ | 1 |                              |   |
| 11 | 81120404  | 81126306  | 3559‡ | 1 |                              |   |
| 11 | 81196875  | 81202385  | 3558‡ | 1 |                              |   |
| 11 | 81634227  | 81640906  | 3561‡ | 1 |                              |   |
| 11 | 81806325  | 81812809  | 3562‡ | 1 |                              |   |
| 11 | 81994344  | 82004815  | 3564‡ | 1 |                              |   |
| 11 | 82025392  | 82031949  | 3565‡ | 1 |                              |   |
| 11 | 83417916  | 83424075  | 3568‡ | 1 |                              |   |
| 11 | 83428600  | 83436577  | 3567‡ | 1 |                              |   |
| 11 | 83442172  | 83448534  | 3566‡ | 1 |                              |   |
| 11 | 85606311  | 85614001  | 3574‡ | 1 |                              |   |
| 11 | 86834121  | 86837479  | 3577‡ | 1 | W-54†                        | 4 |
| 11 | 88042437  | 88048457  | 3580‡ | 1 |                              |   |
| 11 | 88885868  | 88894467  | 3584‡ | 1 |                              |   |
| 11 | 89381304  | 89387559  | 3586‡ | 1 |                              |   |
| 11 | 89847629  | 89858140  | 3587‡ | 1 |                              |   |
| 11 | 91596669  | 91603352  | 3592‡ | 1 |                              |   |
| 11 | 92943569  | 92950131  | 3593‡ | 1 |                              |   |
| 11 | 93103974  | 93117345  | 3594‡ | 1 |                              |   |
| 11 | 93260775  | 93269187  | 3595‡ | 1 |                              |   |
| 11 | 93861745  | 93870007  | 3597‡ | 1 |                              |   |
| 11 | 94118269  | 94125657  | 3598‡ | 1 |                              |   |
| 11 | 94345961  | 94355573  | 3599‡ | 1 |                              |   |
| 11 | 94641601  | 94648049  | 3601‡ | 1 |                              |   |
| 11 | 94650031  | 94657830  | 3600‡ | 1 |                              |   |
| 11 | 95019208  | 95024720  | 3602‡ | 1 |                              |   |
| 11 | 95309460  | 95317607  | 3604‡ | 1 |                              |   |
| 11 | 95609668  | 95615594  | 3605‡ | 1 |                              |   |
| 11 | 95934454  | 95943860  | 3606‡ | 1 |                              |   |
| 11 | 96498941  | 96507538  | 3609‡ | 1 |                              |   |
| 11 | 96587635  | 96596463  | 3610‡ | 1 |                              |   |
| 11 | 96636214  | 96643444  | 3611‡ | 1 |                              |   |
| 11 | 97963444  | 97973856  | 3615‡ | 1 |                              |   |
| 11 | 98418967  | 98424644  | 3616‡ | 1 |                              |   |
| 11 | 98928438  | 98932512  | 3618‡ | 1 |                              |   |
| 11 | 100744891 | 100750676 | 3620‡ | 1 |                              |   |
| 11 | 101211499 | 101221137 | 3621‡ | 1 |                              |   |
| 11 | 101230675 | 101240895 | 3622‡ | 1 |                              |   |
| 11 | 101244304 | 101252307 | 3624‡ | 1 |                              |   |
| 11 | 101695062 | 101704528 | K-8** | 2 | K118,ERVK-25,<br>K(C11c),K36 | 3 |
| 11 | 102903996 | 102909633 | 3627‡ | 1 |                              |   |
| 11 | 103572407 | 103579117 | 3628‡ | 1 |                              |   |
| 11 | 106222532 | 106230507 | 3632‡ | 1 |                              |   |
| 11 | 106296972 | 106303736 | 3633‡ | 1 |                              |   |



|    |           |           |         |   |                         |   |
|----|-----------|-----------|---------|---|-------------------------|---|
| 11 | 107231439 | 107236618 | 3636‡   | 1 |                         |   |
| 11 | 107981084 | 107983117 | W-55†   | 4 |                         |   |
| 11 | 108200410 | 108203433 | 3637‡   | 1 |                         |   |
| 11 | 109961521 | 109967939 | 3640‡   | 1 |                         |   |
| 11 | 110396311 | 110409362 | 3642‡   | 1 |                         |   |
| 11 | 110417225 | 110427736 | 3643‡   | 1 |                         |   |
| 11 | 111052206 | 111058494 | 3644‡   | 1 |                         |   |
| 11 | 112919536 | 112930083 | 3646‡   | 1 |                         |   |
| 11 | 114588190 | 114595876 | 3648‡   | 1 |                         |   |
| 11 | 117810820 | 117812651 | 3651‡   | 1 |                         |   |
| 11 | 118036785 | 118037834 | W-56†   | 4 |                         |   |
| 11 | 118721014 | 118730174 | K-20**  | 2 | ERVK-20,<br>K(C11b),K37 | 3 |
| 11 | 121632566 | 121643491 | 3656‡   | 1 |                         |   |
| 11 | 122546731 | 122555599 | 3658‡   | 1 |                         |   |
| 11 | 122824428 | 122834651 | 3659‡   | 1 |                         |   |
| 11 | 123865325 | 123870880 | 3663‡   | 1 |                         |   |
| 11 | 127767997 | 127774895 | 3672‡   | 1 | ERVH 11q24.2            | 5 |
| 11 | 130564383 | 130570133 | 3673‡   | 1 |                         |   |
| 11 | 130752986 | 130759152 | 3674‡   | 1 |                         |   |
| 11 | 131250638 | 131261172 | 3675‡   | 1 |                         |   |
| 11 | 132375032 | 132381527 | 3676‡   | 1 |                         |   |
| 11 | 133626750 | 133632762 | 3677‡   | 1 |                         |   |
| 12 | 1711131   | 1715463   | 3678‡   | 1 |                         |   |
| 12 | 3422588   | 3430316   | 3679‡   | 1 |                         |   |
| 12 | 4018996   | 4025863   | 3680‡   | 1 |                         |   |
| 12 | 5820734   | 5826818   | 3682‡   | 1 |                         |   |
| 12 | 7178839   | 7189374   | 3683‡   | 1 | W-120†                  | 4 |
| 12 | 7588230   | 7607747   | 3684‡   | 1 |                         |   |
| 12 | 8281117   | 8291582   | 3687‡   | 1 |                         |   |
| 12 | 8319624   | 8324920   | 3688‡   | 1 |                         |   |
| 12 | 8416652   | 8425779   | 3689‡   | 1 |                         |   |
| 12 | 8556766   | 8562284   | 3690‡   | 1 |                         |   |
| 12 | 8761413   | 8768468   | ERVW-23 | 4 |                         |   |
| 12 | 8787064   | 8796436   | 3692‡   | 1 |                         |   |
| 12 | 8804844   | 8810581   | 3694‡   | 1 |                         |   |
| 12 | 9832951   | 9837802   | 3698‡   | 1 |                         |   |
| 12 | 9902699   | 9911285   | 3699‡   | 1 |                         |   |
| 12 | 9959546   | 9968656   | 3701‡   | 1 |                         |   |
| 12 | 10333016  | 10338658  | 3703‡   | 1 |                         |   |
| 12 | 10360361  | 10370314  | 3704‡   | 1 |                         |   |
| 12 | 11462168  | 11468020  | 3710‡   | 1 |                         |   |
| 12 | 11606754  | 11615133  | 3711‡   | 1 |                         |   |
| 12 | 12057940  | 12068548  | 3713‡   | 1 |                         |   |
| 12 | 13259332  | 13265519  | 3714‡   | 1 |                         |   |
| 12 | 14214885  | 14222902  | 3715‡   | 1 |                         |   |
| 12 | 14232268  | 14235122  | 3716‡   | 1 |                         |   |
| 12 | 14702785  | 14710642  | 3720‡   | 1 |                         |   |
| 12 | 17021893  | 17027363  | 3722‡   | 1 |                         |   |
| 12 | 17296990  | 17304852  | 3723‡   | 1 |                         |   |
| 12 | 17469895  | 17479908  | 3724‡   | 1 |                         |   |
| 12 | 18032562  | 18043196  | 3726‡   | 1 |                         |   |
| 12 | 18172532  | 18178434  | 3728‡   | 1 |                         |   |

|    |          |          |         |   |                             |   |
|----|----------|----------|---------|---|-----------------------------|---|
| 12 | 18195762 | 18203724 | 3727‡   | 1 |                             |   |
| 12 | 20762122 | 20778674 | 3730‡   | 1 |                             |   |
| 12 | 20816177 | 20822421 | 3731‡   | 1 | ERVH 12p12.2                | 5 |
| 12 | 20946423 | 20956877 | 3732‡   | 1 |                             |   |
| 12 | 23507131 | 23511362 | 3737‡   | 1 |                             |   |
| 12 | 25163322 | 25169475 | 3738‡   | 1 |                             |   |
| 12 | 26777173 | 26782083 | 3741‡   | 1 |                             |   |
| 12 | 28814048 | 28819426 | 3742‡   | 1 |                             |   |
| 12 | 29135982 | 29140551 | 3743‡   | 1 |                             |   |
| 12 | 30056122 | 30062530 | 3748‡   | 1 |                             |   |
| 12 | 30844146 | 30852087 | 3750‡   | 1 |                             |   |
| 12 | 31937073 | 31944995 | 3751‡   | 1 |                             |   |
| 12 | 34099128 | 34102322 | 3758‡   | 1 | W-121†                      | 4 |
| 12 | 34117740 | 34127780 | 3757‡   | 1 |                             |   |
| 12 | 34265545 | 34274259 | HERVH   | 9 |                             |   |
| 12 | 34521570 | 34530691 | 3761‡   | 1 |                             |   |
| 12 | 34619619 | 34629282 | K-44**  | 2 | K50e                        | 3 |
| 12 | 38123076 | 38131103 | 3769‡   | 1 |                             |   |
| 12 | 38471580 | 38474423 | W-122†  | 4 |                             |   |
| 12 | 38636500 | 38641551 | W-123†  | 4 |                             |   |
| 12 | 38931330 | 38938699 | 3770‡   | 1 |                             |   |
| 12 | 39190840 | 39201157 | 3771‡   | 1 |                             |   |
| 12 | 40386726 | 40394243 | 3772‡   | 1 | W-124†                      | 4 |
| 12 | 42289229 | 42304112 | 3775‡   | 1 |                             |   |
| 12 | 42440799 | 42451511 | 3776‡   | 1 |                             |   |
| 12 | 43977407 | 43979740 | 3777‡   | 1 |                             |   |
| 12 | 44449479 | 44458159 | 3780‡   | 1 |                             |   |
| 12 | 44477855 | 44484556 | 3781‡   | 1 |                             |   |
| 12 | 46032127 | 46035283 | 3783‡   | 1 |                             |   |
| 12 | 46320419 | 46326298 | 3784‡   | 1 |                             |   |
| 12 | 46727181 | 46734247 | 3785‡   | 1 |                             |   |
| 12 | 47445282 | 47448016 | 3786‡   | 1 |                             |   |
| 12 | 48109293 | 48115444 | 3788‡   | 1 |                             |   |
| 12 | 48507426 | 48511691 | 3790‡   | 1 |                             |   |
| 12 | 50491882 | 50498717 | 3792‡   | 1 |                             |   |
| 12 | 50902475 | 50913367 | ERVW-24 | 4 |                             |   |
| 12 | 51736109 | 51740325 | 3795‡   | 1 |                             |   |
| 12 | 52112035 | 52118408 | 3797‡   | 1 |                             |   |
| 12 | 54942538 | 54948366 | 3799‡   | 1 |                             |   |
| 12 | 56492498 | 56498659 | 3804‡   | 1 |                             |   |
| 12 | 57657406 | 57667271 | 3806‡   | 1 |                             |   |
| 12 | 58327458 | 58336915 | K-13**  | 2 | K119,ERVK-21,<br>K(C12),K41 | 3 |
| 12 | 58849353 | 58859752 | 3810‡   | 1 | W-57†                       | 4 |
| 12 | 59101200 | 59110075 | 3811‡   | 1 |                             |   |
| 12 | 59323186 | 59328986 | 3812‡   | 1 |                             |   |
| 12 | 60294616 | 60302893 | 3814‡   | 1 |                             |   |
| 12 | 60951279 | 60957631 | 3816‡   | 1 |                             |   |
| 12 | 61587106 | 61594151 | 3818‡   | 1 |                             |   |
| 12 | 63310335 | 63318909 | 3820‡   | 1 |                             |   |
| 12 | 63414765 | 63419373 | 3822‡   | 1 |                             |   |
| 12 | 64130614 | 64136206 | 3825‡   | 1 |                             |   |
| 12 | 66281497 | 66290831 | 3826‡   | 1 |                             |   |

|    |           |           |        |   |            |   |
|----|-----------|-----------|--------|---|------------|---|
| 12 | 67766804  | 67772346  | 3827‡  | 1 |            |   |
| 12 | 70085290  | 70091969  | 3832‡  | 1 |            |   |
| 12 | 70137388  | 70142028  | 3833‡  | 1 |            |   |
| 12 | 70442191  | 70450110  | 3835‡  | 1 |            |   |
| 12 | 72705499  | 72715004  | 3836‡  | 1 |            |   |
| 12 | 72818511  | 72824743  | 3838‡  | 1 |            |   |
| 12 | 73000535  | 73007727  | 3839‡  | 1 |            |   |
| 12 | 74264424  | 74272845  | 3841‡  | 1 |            |   |
| 12 | 75371091  | 75377752  | 3842‡  | 1 |            |   |
| 12 | 76291618  | 76300850  | 3843‡  | 1 |            |   |
| 12 | 76692124  | 76698035  | 3844‡  | 1 |            |   |
| 12 | 78476885  | 78485323  | 3846‡  | 1 |            |   |
| 12 | 79539848  | 79545636  | 3847‡  | 1 |            |   |
| 12 | 80782524  | 80788903  | 3850‡  | 1 |            |   |
| 12 | 81896577  | 81905618  | 3853‡  | 1 |            |   |
| 12 | 82368067  | 82374373  | 3854‡  | 1 |            |   |
| 12 | 84103011  | 84107711  | 3857‡  | 1 |            |   |
| 12 | 84502186  | 84506979  | 3859‡  | 1 |            |   |
| 12 | 84793971  | 84798674  | W-125† | 4 |            |   |
| 12 | 86938451  | 86946946  | 3861‡  | 1 |            |   |
| 12 | 87664273  | 87669384  | 3863‡  | 1 |            |   |
| 12 | 87903932  | 87912836  | 3864‡  | 1 |            |   |
| 12 | 88173235  | 88183818  | 3866‡  | 1 |            |   |
| 12 | 88227445  | 88235542  | 3867‡  | 1 |            |   |
| 12 | 88367521  | 88375449  | 3868‡  | 1 |            |   |
| 12 | 90984689  | 90992447  | 3874‡  | 1 |            |   |
| 12 | 92386730  | 92394176  | 3876‡  | 1 |            |   |
| 12 | 94355584  | 94362873  | 3880‡  | 1 |            |   |
| 12 | 95442616  | 95448166  | 3882‡  | 1 |            |   |
| 12 | 95448373  | 95458090  | 3881‡  | 1 |            |   |
| 12 | 95749008  | 95757677  | 3883‡  | 1 |            |   |
| 12 | 99715179  | 99723796  | 3886‡  | 1 |            |   |
| 12 | 100159473 | 100166196 | 3887‡  | 1 |            |   |
| 12 | 100633105 | 100648335 | 3888‡  | 1 |            |   |
| 12 | 102660490 | 102666731 | 3891‡  | 1 |            |   |
| 12 | 103222089 | 103229120 | 3892‡  | 1 |            |   |
| 12 | 104824074 | 104828664 | 3894‡  | 1 |            |   |
| 12 | 104943254 | 104944044 | W-126† | 4 |            |   |
| 12 | 105302834 | 105309240 | 3895‡  | 1 |            |   |
| 12 | 105309247 | 105313375 | 3898‡  | 1 |            |   |
| 12 | 105604459 | 105610131 | 3899‡  | 1 |            |   |
| 12 | 110403279 | 110411068 | 3901‡  | 1 |            |   |
| 12 | 110570037 | 110571520 | K-69** | 2 | K(16p11.2) | 3 |
| 12 | 111816238 | 111825646 | 3902‡  | 1 | ERVK3-5    | 6 |
| 12 | 114055744 | 114063389 | 3903‡  | 1 |            |   |
| 12 | 114064657 | 114073070 | 3905‡  | 1 |            |   |
| 12 | 117650038 | 117657245 | 3906‡  | 1 |            |   |
| 12 | 118477758 | 118492028 | 3907‡  | 1 |            |   |
| 12 | 120606997 | 120614359 | 3908‡  | 1 |            |   |
| 12 | 123548417 | 123558736 | W-127† | 4 |            |   |
| 12 | 126032246 | 126032814 | 3912‡  | 1 |            |   |
| 12 | 126612961 | 126618470 | 3913‡  | 1 |            |   |
| 12 | 127153668 | 127156488 | 3914‡  | 1 |            |   |

|    |           |           |               |    |        |   |
|----|-----------|-----------|---------------|----|--------|---|
| 12 | 127480969 | 127489317 | 3915‡         | 1  |        |   |
| 12 | 127610384 | 127617989 | 3916‡         | 1  |        |   |
| 12 | 131336583 | 131341336 | 3919‡         | 1  |        |   |
| 12 | 131867698 | 131880952 | 3920‡         | 1  | W-58†  | 4 |
| 12 | 132889550 | 132898380 | 3921‡         | 1  |        |   |
| 12 | 133090536 | 133096478 | 3922‡         | 1  | K42    | 3 |
| 13 | 19626060  | 19635907  | 3927‡         | 1  |        |   |
| 13 | 20678765  | 20685230  | 3929‡         | 1  |        |   |
| 13 | 23006469  | 23008782  | 3931‡         | 1  |        |   |
| 13 | 23525044  | 23532770  | 3932‡         | 1  |        |   |
| 13 | 24927392  | 24930999  | 3935‡         | 1  |        |   |
| 13 | 27212362  | 27220509  | 3937‡         | 1  |        |   |
| 13 | 34798094  | 34802020  | 3941‡         | 1  |        |   |
| 13 | 35143340  | 35147650  | 3942‡         | 1  |        |   |
| 13 | 36316325  | 36321264  | 3943‡         | 1  |        |   |
| 13 | 36956649  | 36958981  | ERVW-25       | 4  |        |   |
| 13 | 37965980  | 37975592  | 3946‡         | 1  |        |   |
| 13 | 40874210  | 40881161  | 3949‡         | 1  |        |   |
| 13 | 41419198  | 41426048  | 3950‡         | 1  |        |   |
| 13 | 42865081  | 42873158  | 3951‡         | 1  |        |   |
| 13 | 46283997  | 46284227  | cORF1 of HML2 | 10 |        |   |
| 13 | 48056441  | 48062297  | 3955‡         | 1  |        |   |
| 13 | 48616548  | 48625882  | 3956‡         | 1  |        |   |
| 13 | 48867575  | 48872863  | 3957‡         | 1  |        |   |
| 13 | 51169716  | 51178462  | 3959‡         | 1  |        |   |
| 13 | 54127417  | 54133158  | 3962‡         | 1  |        |   |
| 13 | 54268582  | 54281346  | 3963‡         | 1  |        |   |
| 13 | 54693161  | 54697528  | 3965‡         | 1  |        |   |
| 13 | 54700695  | 54707583  | 3964‡         | 1  |        |   |
| 13 | 54910920  | 54919216  | 3966‡         | 1  |        |   |
| 13 | 55053785  | 55062564  | 3967‡         | 1  | W-128† | 4 |
| 13 | 55578231  | 55584088  | 3968‡         | 1  |        |   |
| 13 | 55654930  | 55660802  | 3969‡         | 1  |        |   |
| 13 | 55871316  | 55879892  | 3970‡         | 1  |        |   |
| 13 | 56040251  | 56047190  | 3971‡         | 1  |        |   |
| 13 | 56112402  | 56118290  | 3972‡         | 1  |        |   |
| 13 | 61088438  | 61095488  | 3976‡         | 1  |        |   |
| 13 | 61205682  | 61212008  | 3977‡         | 1  |        |   |
| 13 | 62149074  | 62158240  | 3978‡         | 1  |        |   |
| 13 | 63213291  | 63217634  | 3979‡         | 1  |        |   |
| 13 | 63233909  | 63237379  | 3980‡         | 1  |        |   |
| 13 | 64362662  | 64369318  | 3984‡         | 1  |        |   |
| 13 | 64702661  | 64709475  | 3985‡         | 1  |        |   |
| 13 | 66137809  | 66147046  | 3987‡         | 1  |        |   |
| 13 | 66225355  | 66232361  | 3986‡         | 1  |        |   |
| 13 | 67397372  | 67405701  | 3991‡         | 1  |        |   |
| 13 | 68551479  | 68559215  | 3992‡         | 1  |        |   |
| 13 | 71027795  | 71031307  | 3998‡         | 1  |        |   |
| 13 | 72018779  | 72024309  | 3999‡         | 1  |        |   |
| 13 | 76983510  | 76993630  | 4003‡         | 1  |        |   |
| 13 | 77933221  | 77939379  | 4006‡         | 1  |        |   |
| 13 | 80183286  | 80189980  | 4009‡         | 1  |        |   |
| 13 | 81866271  | 81874925  | 4012‡         | 1  |        |   |

|    |           |           |              |   |                        |   |
|----|-----------|-----------|--------------|---|------------------------|---|
| 13 | 82323122  | 82331429  | 4013‡        | 1 |                        |   |
| 13 | 82970277  | 82975361  | 4015‡        | 1 |                        |   |
| 13 | 83906711  | 83913797  | 4017‡        | 1 |                        |   |
| 13 | 84869081  | 84877709  | 4018‡        | 1 |                        |   |
| 13 | 86358155  | 86365765  | 4021‡        | 1 |                        |   |
| 13 | 86757453  | 86765921  | 4023‡        | 1 |                        |   |
| 13 | 87186448  | 87192108  | 4024‡        | 1 |                        |   |
| 13 | 87335241  | 87342563  | 4027‡        | 1 |                        |   |
| 13 | 87349981  | 87356844  | 4028‡        | 1 |                        |   |
| 13 | 88509740  | 88518743  | 4029‡        | 1 |                        |   |
| 13 | 89655525  | 89666393  | 4034‡        | 1 |                        |   |
| 13 | 90287079  | 90294324  | 4035‡        | 1 |                        |   |
| 13 | 90611194  | 90622128  | 4036‡        | 1 |                        |   |
| 13 | 90839491  | 90844113  | 4039‡        | 1 |                        |   |
| 13 | 90846804  | 90854278  | 4038‡        | 1 |                        |   |
| 13 | 93039391  | 93045152  | 4043‡        | 1 |                        |   |
| 13 | 97585772  | 97597701  | 4046‡        | 1 |                        |   |
| 13 | 97642318  | 97649512  | 4045‡        | 1 |                        |   |
| 13 | 97767568  | 97773962  | 4047‡        | 1 |                        |   |
| 13 | 98761877  | 98767723  | 4048‡        | 1 |                        |   |
| 13 | 99488624  | 99496752  | 4050‡        | 1 |                        |   |
| 13 | 100080210 | 100088667 | 4051‡        | 1 |                        |   |
| 13 | 100283433 | 100286288 | 4052‡        | 1 |                        |   |
| 13 | 101219487 | 101228820 | 4053‡        | 1 |                        |   |
| 13 | 102669280 | 102672426 | 4054‡        | 1 |                        |   |
| 13 | 104206933 | 104213834 | 4055‡        | 1 |                        |   |
| 13 | 107885027 | 107897487 | 4056‡        | 1 |                        |   |
| 13 | 109265090 | 109271116 | ERVH 13q33.3 | 5 |                        |   |
| 13 | 110965846 | 110972486 | 4059‡        | 1 |                        |   |
| 13 | 111189507 | 111199087 | 4060‡        | 1 |                        |   |
| 14 | 18347360  | 18359735  | 4061‡        | 1 |                        |   |
| 14 | 19974027  | 19984673  | 4062‡        | 1 |                        |   |
| 14 | 20569441  | 20577476  | 4065‡        | 1 |                        |   |
| 14 | 20715361  | 20726308  | 4068‡        | 1 |                        |   |
| 14 | 20807624  | 20817205  | 4071‡        | 1 |                        |   |
| 14 | 20829991  | 20836521  | 4070‡        | 1 |                        |   |
| 14 | 21003301  | 21011512  | 4074‡        | 1 |                        |   |
| 14 | 22236550  | 22244186  | W-129†       | 4 |                        |   |
| 14 | 24009540  | 24015782  | 4086‡        | 1 | K(OLDAL136419),<br>K71 | 3 |
| 14 | 25281090  | 25287444  | 4088‡        | 1 |                        |   |
| 14 | 25418438  | 25431789  | 4090‡        | 1 |                        |   |
| 14 | 26259722  | 26261009  | W-130†       | 4 |                        |   |
| 14 | 27117730  | 27122638  | 4091‡        | 1 |                        |   |
| 14 | 28410708  | 28421229  | 4093‡        | 1 |                        |   |
| 14 | 29172566  | 29176666  | 4094‡        | 1 |                        |   |
| 14 | 29251543  | 29259610  | 4095‡        | 1 |                        |   |
| 14 | 30041558  | 30054141  | 4096‡        | 1 |                        |   |
| 14 | 30965849  | 30972548  | 4097‡        | 1 |                        |   |
| 14 | 31240557  | 31251389  | 4098‡        | 1 |                        |   |
| 14 | 31271807  | 31280829  | 4099‡        | 1 |                        |   |
| 14 | 31701990  | 31712213  | 4100‡        | 1 |                        |   |
| 14 | 32235295  | 32250524  | 4103‡        | 1 |                        |   |

|    |          |          |         |   |              |   |
|----|----------|----------|---------|---|--------------|---|
| 14 | 34650309 | 34655200 | 4104‡   | 1 |              |   |
| 14 | 38190638 | 38196528 | 4109‡   | 1 |              |   |
| 14 | 39893312 | 39899665 | 4116‡   | 1 |              |   |
| 14 | 41234056 | 41240317 | 4118‡   | 1 |              |   |
| 14 | 41515871 | 41522403 | 4121‡   | 1 |              |   |
| 14 | 42309013 | 42313917 | 4123‡   | 1 |              |   |
| 14 | 42802594 | 42808056 | 4125‡   | 1 |              |   |
| 14 | 43001685 | 43009333 | 4126‡   | 1 |              |   |
| 14 | 43606507 | 43617077 | 4128‡   | 1 |              |   |
| 14 | 44415788 | 44419209 | 4129‡   | 1 |              |   |
| 14 | 44667983 | 44677819 | 4130‡   | 1 |              |   |
| 14 | 45019485 | 45023694 | ERVW-26 | 4 |              |   |
| 14 | 45491976 | 45501194 | 4133‡   | 1 |              |   |
| 14 | 46011773 | 46018071 | 4136‡   | 1 |              |   |
| 14 | 46544006 | 46552096 | 4137‡   | 1 |              |   |
| 14 | 46581310 | 46589134 | 4138‡   | 1 |              |   |
| 14 | 47104441 | 47110722 | 4139‡   | 1 |              |   |
| 14 | 48254348 | 48260686 | 4141‡   | 1 |              |   |
| 14 | 48261795 | 48268295 | 4142‡   | 1 |              |   |
| 14 | 50544972 | 50554903 | 4146‡   | 1 |              |   |
| 14 | 50893357 | 50901034 | 4147‡   | 1 |              |   |
| 14 | 51748535 | 51752557 | 4150‡   | 1 |              |   |
| 14 | 52164861 | 52172557 | 4151‡   | 1 |              |   |
| 14 | 52280717 | 52286570 | 4152‡   | 1 |              |   |
| 14 | 53128745 | 53135507 | 4153‡   | 1 |              |   |
| 14 | 53175755 | 53181523 | 4154‡   | 1 |              |   |
| 14 | 53361642 | 53363005 | W-131†  | 4 |              |   |
| 14 | 57328587 | 57332180 | 4159‡   | 1 |              |   |
| 14 | 57367153 | 57374327 | 4160‡   | 1 |              |   |
| 14 | 57722120 | 57731082 | 4161‡   | 1 |              |   |
| 14 | 58122280 | 58126144 | W-132†  | 4 |              |   |
| 14 | 59443912 | 59453014 | 4164‡   | 1 |              |   |
| 14 | 59610765 | 59618496 | 4165‡   | 1 |              |   |
| 14 | 61114583 | 61121488 | 4167‡   | 1 |              |   |
| 14 | 61134417 | 61138964 | 4166‡   | 1 |              |   |
| 14 | 69809152 | 69819704 | 4174‡   | 1 | ERVK3-2      | 6 |
| 14 | 69821729 | 69828068 | 4175‡   | 1 |              |   |
| 14 | 70293538 | 70301890 | 4176‡   | 1 |              |   |
| 14 | 70436467 | 70443159 | 4177‡   | 1 |              |   |
| 14 | 70536593 | 70544307 | 4180‡   | 1 |              |   |
| 14 | 71124207 | 71131040 | 4181‡   | 1 |              |   |
| 14 | 71936103 | 71941896 | 4182‡   | 1 |              |   |
| 14 | 73126645 | 73134839 | 4183‡   | 1 |              |   |
| 14 | 73702886 | 73716167 | 4184‡   | 1 | ERVH 14q24.3 | 5 |
| 14 | 75577964 | 75587648 | 4185‡   | 1 |              |   |
| 14 | 80224810 | 80231256 | 4189‡   | 1 |              |   |
| 14 | 80464410 | 80472959 | 4190‡   | 1 |              |   |
| 14 | 82060324 | 82065142 | 4192‡   | 1 |              |   |
| 14 | 83049046 | 83058301 | 4193‡   | 1 |              |   |
| 14 | 84499245 | 84505986 | 4194‡   | 1 |              |   |
| 14 | 84559171 | 84563615 | 4195‡   | 1 |              |   |
| 14 | 85730330 | 85737084 | 4197‡   | 1 |              |   |
| 14 | 85927831 | 85934155 | 4199‡   | 1 |              |   |

|    |           |           |         |   |              |   |
|----|-----------|-----------|---------|---|--------------|---|
| 14 | 86731586  | 86737061  | 4201‡   | 1 |              |   |
| 14 | 87234694  | 87240812  | 4204‡   | 1 |              |   |
| 14 | 91225664  | 91226868  | ERVW-27 | 4 |              |   |
| 14 | 92041755  | 92049863  | 4213‡   | 1 | ERVH-7       | 6 |
| 14 | 92622417  | 92629608  | 4215‡   | 1 |              |   |
| 14 | 92759618  | 92766481  | 4216‡   | 1 |              |   |
| 14 | 93559405  | 93567654  | 4217‡   | 1 |              |   |
| 14 | 95973027  | 95978845  | 4218‡   | 1 |              |   |
| 14 | 98440218  | 98453060  | 4219‡   | 1 |              |   |
| 14 | 98985269  | 98992897  | 4220‡   | 1 | ERVH-4       | 6 |
| 14 | 101305080 | 101311247 | 4221‡   | 1 |              |   |
| 14 | 101315332 | 101324645 | 4222‡   | 1 |              |   |
| 14 | 102234173 | 102245769 | 4224‡   | 1 |              |   |
| 14 | 103170981 | 103174719 | 4225‡   | 1 |              |   |
| 14 | 103234948 | 103242530 | 4226‡   | 1 |              |   |
| 14 | 105673312 | 105676203 | K-68**  | 2 | K(15q25.2)   | 3 |
| 14 | 106196994 | 106207092 | 4229‡   | 1 |              |   |
| 14 | 106628207 | 106641568 | 4231‡   | 1 |              |   |
| 14 | 106697991 | 106702899 | 4232‡   | 1 |              |   |
| 14 | 106836379 | 106845737 | 4235‡   | 1 |              |   |
| 15 | 23695606  | 23702460  | 4242‡   | 1 |              |   |
| 15 | 23995511  | 24006447  | 4244‡   | 1 |              |   |
| 15 | 24034313  | 24038355  | 4243‡   | 1 |              |   |
| 15 | 24686532  | 24690622  | 4245‡   | 1 |              |   |
| 15 | 25636574  | 25643902  | 4246‡   | 1 |              |   |
| 15 | 34154889  | 34161933  | 4249‡   | 1 |              |   |
| 15 | 35238616  | 35243837  | 4250‡   | 1 |              |   |
| 15 | 37237400  | 37242569  | 4251‡   | 1 |              |   |
| 15 | 39010622  | 39015774  | 4254‡   | 1 |              |   |
| 15 | 41131606  | 41137201  | 4257‡   | 1 |              |   |
| 15 | 41587554  | 41592735  | 4258‡   | 1 |              |   |
| 15 | 42884920  | 42890353  | 4259‡   | 1 |              |   |
| 15 | 44864039  | 44873800  | 4260‡   | 1 |              |   |
| 15 | 45013211  | 45014718  | 4261‡   | 1 |              |   |
| 15 | 45234723  | 45243038  | 4263‡   | 1 |              |   |
| 15 | 49698499  | 49704745  | 4267‡   | 1 |              |   |
| 15 | 49831193  | 49843599  | 4268‡   | 1 |              |   |
| 15 | 50867393  | 50875568  | 4269‡   | 1 |              |   |
| 15 | 51282241  | 51286694  | 4270‡   | 1 |              |   |
| 15 | 51357587  | 51367580  | 4271‡   | 1 |              |   |
| 15 | 52737735  | 52747427  | 4274‡   | 1 |              |   |
| 15 | 53426849  | 53432484  | 4276‡   | 1 |              |   |
| 15 | 53910769  | 53914712  | ERV18-1 | 6 |              |   |
| 15 | 54888110  | 54893895  | 4278‡   | 1 |              |   |
| 15 | 55304850  | 55312434  | 4279‡   | 1 | ERVW-4-2013* | 4 |
| 15 | 55510818  | 55517096  | 4281‡   | 1 |              |   |
| 15 | 62212126  | 62219036  | 4286‡   | 1 |              |   |
| 15 | 66964956  | 66974209  | 4288‡   | 1 |              |   |
| 15 | 68987903  | 68999296  | 4289‡   | 1 |              |   |
| 15 | 74354144  | 74361624  | 4291‡   | 1 |              |   |
| 15 | 76262994  | 76269672  | 4292‡   | 1 |              |   |
| 15 | 82372396  | 82380476  | 4295‡   | 1 |              |   |
| 15 | 82487862  | 82503740  | 4296‡   | 1 |              |   |

|    |           |           |        |   |            |   |
|----|-----------|-----------|--------|---|------------|---|
| 15 | 82702480  | 82708397  | 4300‡  | 1 |            |   |
| 15 | 84214491  | 84222978  | 4301‡  | 1 |            |   |
| 15 | 85219120  | 85227604  | 4302‡  | 1 |            |   |
| 15 | 87829824  | 87840842  | 4306‡  | 1 |            |   |
| 15 | 88540526  | 88544253  | 4308‡  | 1 |            |   |
| 15 | 88547267  | 88551061  | 4307‡  | 1 |            |   |
| 15 | 89232355  | 89239939  | 4309‡  | 1 |            |   |
| 15 | 89463857  | 89470416  | 4310‡  | 1 |            |   |
| 15 | 90132968  | 90139381  | 4312‡  | 1 |            |   |
| 15 | 92207154  | 92214974  | 4314‡  | 1 |            |   |
| 15 | 92299688  | 92306258  | 4315‡  | 1 | W-133†     | 4 |
| 15 | 92511422  | 92518355  | 4316‡  | 1 |            |   |
| 15 | 94754310  | 94761255  | 4319‡  | 1 |            |   |
| 15 | 96868546  | 96878200  | 4321‡  | 1 |            |   |
| 15 | 100440303 | 100446215 | 4327‡  | 1 |            |   |
| 15 | 101072781 | 101079317 | 4329‡  | 1 |            |   |
| 16 | 2660502   | 2669985   | 4331‡  | 1 |            |   |
| 16 | 3079068   | 3081318   | 4332‡  | 1 |            |   |
| 16 | 7814787   | 7820390   | 4334‡  | 1 |            |   |
| 16 | 8833027   | 8836478   | 4336‡  | 1 |            |   |
| 16 | 8837971   | 8845472   | 4335‡  | 1 |            |   |
| 16 | 9668891   | 9677042   | 4337‡  | 1 |            |   |
| 16 | 10281180  | 10293802  | 4338‡  | 1 |            |   |
| 16 | 10419374  | 10424167  | 4340‡  | 1 |            |   |
| 16 | 13351638  | 13357812  | 4342‡  | 1 |            |   |
| 16 | 18990801  | 18997310  | 4346‡  | 1 |            |   |
| 16 | 19272467  | 19281247  | 4347‡  | 1 |            |   |
| 16 | 19393612  | 19402129  | 4349‡  | 1 |            |   |
| 16 | 19948928  | 19960208  | 4350‡  | 1 |            |   |
| 16 | 20645362  | 20660154  | 4351‡  | 1 |            |   |
| 16 | 20674233  | 20681995  | 4352‡  | 1 |            |   |
| 16 | 21629614  | 21637525  | 4353‡  | 1 |            |   |
| 16 | 25140797  | 25149484  | 4354‡  | 1 |            |   |
| 16 | 29709122  | 29719509  | 4357‡  | 1 |            |   |
| 16 | 30096935  | 30104154  | 4360‡  | 1 |            |   |
| 16 | 30541069  | 30546762  | 4361‡  | 1 |            |   |
| 16 | 30615777  | 30624188  | 4362‡  | 1 |            |   |
| 16 | 30859669  | 30865380  | 4363‡  | 1 |            |   |
| 16 | 31540227  | 31544350  | 4365‡  | 1 |            |   |
| 16 | 31659998  | 31668486  | 4366‡  | 1 |            |   |
| 16 | 31763217  | 31769515  | 4367‡  | 1 |            |   |
| 16 | 34997025  | 34999771  | K-75** | 2 | K(19p13.3) | 3 |
| 16 | 35070457  | 35074568  | 4370‡  | 1 |            |   |
| 16 | 35267935  | 35277008  | 4374‡  | 1 |            |   |
| 16 | 35516772  | 35524442  | 4375‡  | 1 |            |   |
| 16 | 35614913  | 35621339  | 4376‡  | 1 |            |   |
| 16 | 35736550  | 35745727  | 4377‡  | 1 |            |   |
| 16 | 35797699  | 35804523  | 4378‡  | 1 |            |   |
| 16 | 35897938  | 35902013  | 4380‡  | 1 |            |   |
| 16 | 35902186  | 35911238  | 4379‡  | 1 |            |   |
| 16 | 47838360  | 47843760  | 4384‡  | 1 |            |   |
| 16 | 55628465  | 55635257  | 4389‡  | 1 |            |   |
| 16 | 57397104  | 57399037  | 4391‡  | 1 |            |   |



|    |          |          |                              |   |             |   |
|----|----------|----------|------------------------------|---|-------------|---|
| 16 | 59514998 | 59522918 | 4393‡                        | 1 |             |   |
| 16 | 60846981 | 60853639 | HERVL (ERV-<br>like element) | 9 |             |   |
| 16 | 62645730 | 62648572 | 4400‡                        | 1 |             |   |
| 16 | 62977783 | 62986249 | 4401‡                        | 1 |             |   |
| 16 | 65227134 | 65236580 | 4403‡                        | 1 |             |   |
| 16 | 65274875 | 65278944 | 4405‡                        | 1 |             |   |
| 16 | 70616691 | 70625455 | 4409‡                        | 1 |             |   |
| 16 | 72064269 | 72073376 | 4410‡                        | 1 |             |   |
| 16 | 86278095 | 86281279 | ERVH 16q24.1                 | 5 |             |   |
| 16 | 86739329 | 86747655 | 4419‡                        | 1 |             |   |
| 17 | 6727283  | 6738474  | 4420‡                        | 1 |             |   |
| 17 | 6875146  | 6881530  | 4421‡                        | 1 |             |   |
| 17 | 8056336  | 8063901  | K-49**                       | 2 | K(19q13.41) | 3 |
| 17 | 11971744 | 11978102 | 4426‡                        | 1 |             |   |
| 17 | 19879675 | 19896052 | 4428‡                        | 1 |             |   |
| 17 | 21072583 | 21080211 | 4429‡                        | 1 |             |   |
| 17 | 27692633 | 27702954 | 4432‡                        | 1 |             |   |
| 17 | 27712076 | 27720948 | 4433‡                        | 1 |             |   |
| 17 | 28230516 | 28239177 | 4434‡                        | 1 | ERVE-1      | 6 |
| 17 | 29987658 | 29991258 | 4437‡                        | 1 |             |   |
| 17 | 31631006 | 31637132 | 4438‡                        | 1 |             |   |
| 17 | 31762338 | 31771882 | 4439‡                        | 1 |             |   |
| 17 | 32964050 | 32974337 | 4440‡                        | 1 |             |   |
| 17 | 34183507 | 34192680 | 4442‡                        | 1 |             |   |
| 17 | 35296918 | 35316213 | 4443‡                        | 1 |             |   |
| 17 | 35500762 | 35508355 | 4444‡                        | 1 |             |   |
| 17 | 35551287 | 35552593 | W-134†                       | 4 |             |   |
| 17 | 36466031 | 36475560 | 4447‡                        | 1 |             |   |
| 17 | 37330584 | 37336054 | 4448‡                        | 1 | ERVW-28     | 4 |
| 17 | 43323163 | 43333941 | 4453‡                        | 1 |             |   |
| 17 | 43338416 | 43349017 | 4452‡                        | 1 |             |   |
| 17 | 43352787 | 43357982 | 4454‡                        | 1 |             |   |
| 17 | 43872267 | 43876352 | 4457‡                        | 1 |             |   |
| 17 | 49107830 | 49116242 | 4462‡                        | 1 |             |   |
| 17 | 49163052 | 49176203 | 4463‡                        | 1 |             |   |
| 17 | 50397815 | 50405707 | 4464‡                        | 1 | W-59†       | 4 |
| 17 | 50412688 | 50420267 | 4465‡                        | 1 |             |   |
| 17 | 52574094 | 52585118 | 4467‡                        | 1 |             |   |
| 17 | 52591115 | 52602857 | 4466‡                        | 1 |             |   |
| 17 | 54286499 | 54295060 | 4471‡                        | 1 |             |   |
| 17 | 54328646 | 54330924 | 4472‡                        | 1 |             |   |
| 17 | 54410397 | 54416984 | 4473‡                        | 1 |             |   |
| 17 | 55008205 | 55018728 | 4474‡                        | 1 | W-60†       | 4 |
| 17 | 55467894 | 55476522 | 4475‡                        | 1 |             |   |
| 17 | 74583315 | 74595968 | 4481‡                        | 1 |             |   |
| 17 | 74910074 | 74915347 | 4483‡                        | 1 |             |   |
| 17 | 75023738 | 75028744 | 4484‡                        | 1 |             |   |
| 17 | 75252632 | 75258297 | 4485‡                        | 1 |             |   |
| 17 | 76606001 | 76611275 | 4487‡                        | 1 |             |   |
| 17 | 77167827 | 77175201 | 4488‡                        | 1 |             |   |
| 17 | 80399794 | 80408186 | 4489‡                        | 1 |             |   |
| 17 | 80537010 | 80552020 | 4490‡                        | 1 |             |   |

|    |          |          |         |   |        |   |
|----|----------|----------|---------|---|--------|---|
| 18 | 405896   | 418808   | 4491‡   | 1 |        |   |
| 18 | 1854933  | 1861462  | 4494‡   | 1 |        |   |
| 18 | 2833587  | 2839450  | 4495‡   | 1 |        |   |
| 18 | 4681679  | 4692409  | W-135†  | 4 |        |   |
| 18 | 8913793  | 8921204  | 4503‡   | 1 |        |   |
| 18 | 9424030  | 9427513  | 4504‡   | 1 |        |   |
| 18 | 10221865 | 10226332 | 4505‡   | 1 |        |   |
| 18 | 11130175 | 11134262 | 4506‡   | 1 |        |   |
| 18 | 11544671 | 11551959 | 4508‡   | 1 |        |   |
| 18 | 13656681 | 13657838 | ERVW-29 | 4 |        |   |
| 18 | 13700699 | 13707821 | 4511‡   | 1 |        |   |
| 18 | 15308329 | 15316530 | 4518‡   | 1 |        |   |
| 18 | 23283957 | 23288878 | 4519‡   | 1 |        |   |
| 18 | 26231675 | 26245800 | 4521‡   | 1 |        |   |
| 18 | 28208152 | 28214533 | 4523‡   | 1 |        |   |
| 18 | 28691941 | 28698881 | 4525‡   | 1 |        |   |
| 18 | 29356485 | 29362582 | 4526‡   | 1 |        |   |
| 18 | 29420046 | 29423974 | 4527‡   | 1 |        |   |
| 18 | 29872922 | 29877768 | 4528‡   | 1 |        |   |
| 18 | 30135865 | 30143080 | 4529‡   | 1 |        |   |
| 18 | 30625182 | 30633516 | 4531‡   | 1 |        |   |
| 18 | 31803770 | 31810043 | 4533‡   | 1 |        |   |
| 18 | 31970321 | 31981465 | 4535‡   | 1 |        |   |
| 18 | 31998775 | 32005053 | 4534‡   | 1 |        |   |
| 18 | 33560623 | 33566943 | 4536‡   | 1 |        |   |
| 18 | 35353552 | 35361787 | 4539‡   | 1 |        |   |
| 18 | 35831957 | 35840524 | 4542‡   | 1 |        |   |
| 18 | 35844055 | 35850428 | 4543‡   | 1 |        |   |
| 18 | 35872672 | 35880648 | 4541‡   | 1 |        |   |
| 18 | 42461608 | 42467075 | 4545‡   | 1 |        |   |
| 18 | 42737085 | 42743765 | 4547‡   | 1 |        |   |
| 18 | 42991607 | 42999457 | 4548‡   | 1 |        |   |
| 18 | 43354715 | 43364507 | 4549‡   | 1 |        |   |
| 18 | 43398000 | 43404579 | 4550‡   | 1 |        |   |
| 18 | 43508210 | 43515185 | 4551‡   | 1 |        |   |
| 18 | 46868452 | 46877781 | 4555‡   | 1 |        |   |
| 18 | 50400453 | 50408730 | 4558‡   | 1 |        |   |
| 18 | 51112856 | 51117176 | 4559‡   | 1 |        |   |
| 18 | 51569471 | 51574188 | 4560‡   | 1 |        |   |
| 18 | 51696650 | 51710020 | 4561‡   | 1 |        |   |
| 18 | 51955406 | 51960032 | 4562‡   | 1 |        |   |
| 18 | 54604251 | 54607517 | 4564‡   | 1 |        |   |
| 18 | 55950480 | 55957854 | 4565‡   | 1 |        |   |
| 18 | 56415436 | 56421342 | 4566‡   | 1 |        |   |
| 18 | 57064652 | 57072399 | 4567‡   | 1 |        |   |
| 18 | 58641222 | 58646708 | 4570‡   | 1 |        |   |
| 18 | 59730015 | 59738820 | 4572‡   | 1 |        |   |
| 18 | 60709799 | 60713080 | 4576‡   | 1 | W-136† | 4 |
| 18 | 61707231 | 61718661 | 4577‡   | 1 |        |   |
| 18 | 62482341 | 62483090 | W-137†  | 4 |        |   |
| 18 | 64681718 | 64687158 | 4579‡   | 1 |        |   |
| 18 | 66890716 | 66895236 | 4581‡   | 1 |        |   |
| 18 | 69972652 | 69977749 | 4583‡   | 1 |        |   |

|    |          |          |                     |   |          |   |
|----|----------|----------|---------------------|---|----------|---|
| 18 | 73324600 | 73330355 | 4585‡               | 1 |          |   |
| 18 | 74293058 | 74298748 | 4587‡               | 1 |          |   |
| 18 | 80023869 | 80033162 | 4589‡               | 1 |          |   |
| 19 | 385098   | 387637   | K-77**              | 2 | ERVK-22  | 3 |
| 19 | 5158650  | 5165741  | 4593‡               | 1 |          |   |
| 19 | 5548576  | 5553242  | 4594‡               | 1 |          |   |
| 19 | 5852219  | 5857669  | 4595‡               | 1 |          |   |
| 19 | 6572631  | 6577889  | 4596‡               | 1 |          |   |
| 19 | 7791837  | 7801535  | 4599‡               | 1 |          |   |
| 19 | 8379293  | 8386644  | 4601‡               | 1 |          |   |
| 19 | 9313307  | 9323055  | 4604‡               | 1 |          |   |
| 19 | 9453926  | 9462365  | 4605‡               | 1 |          |   |
| 19 | 9508129  | 9515054  | 4606‡               | 1 | ERVK3-7  | 6 |
| 19 | 9539407  | 9550555  | 4607‡               | 1 |          |   |
| 19 | 9587772  | 9597068  | 4608‡               | 1 |          |   |
| 19 | 9626252  | 9638082  | 4611‡               | 1 |          |   |
| 19 | 9709656  | 9722342  | 4615‡               | 1 |          |   |
| 19 | 9723690  | 9729535  | 4614‡               | 1 |          |   |
| 19 | 9741762  | 9751748  | 4613‡               | 1 |          |   |
| 19 | 11853297 | 11860978 | 4617‡               | 1 |          |   |
| 19 | 11942587 | 11948985 | 4618‡               | 1 |          |   |
| 19 | 12022768 | 12025931 | 4619‡               | 1 |          |   |
| 19 | 12098326 | 12104292 | 4621‡               | 1 |          |   |
| 19 | 12451192 | 12454278 | 4623‡               | 1 |          |   |
| 19 | 15828861 | 15837304 | 4627‡               | 1 |          |   |
| 19 | 15998323 | 16001755 | 4628‡               | 1 |          |   |
| 19 | 17592763 | 17603116 | 4630‡               | 1 |          |   |
| 19 | 18577415 | 18587893 | 4632‡               | 1 |          |   |
| 19 | 19943770 | 19956655 | 4633‡               | 1 |          |   |
| 19 | 20087908 | 20096742 | 4634‡               | 1 |          |   |
| 19 | 20099335 | 20101462 | W-138†              | 4 |          |   |
| 19 | 20276590 | 20286703 | K-26**              | 2 | K52      | 3 |
| 19 | 20311123 | 20323199 | 4640‡               | 1 |          |   |
| 19 | 20362040 | 20371673 | 4639‡               | 1 | ERVS71-1 | 6 |
| 19 | 20474031 | 20480623 | 4644‡               | 1 |          |   |
| 19 | 20500279 | 20509600 | 4642‡               | 1 |          |   |
| 19 | 20510014 | 20518365 | 4641‡               | 1 |          |   |
| 19 | 20611051 | 20618132 | 4646‡               | 1 |          |   |
| 19 | 20710659 | 20712797 | 4647‡               | 1 |          |   |
| 19 | 20746820 | 20755632 | HERVE<br>(HERV 4-1) | 9 |          |   |
| 19 | 20769294 | 20780609 | 4649‡               | 1 |          |   |
| 19 | 21129058 | 21132177 | 4650‡               | 1 |          |   |
| 19 | 21197736 | 21207006 | 4651‡               | 1 |          |   |
| 19 | 21234245 | 21237757 | 4653‡               | 1 |          |   |
| 19 | 21253166 | 21264283 | 4652‡               | 1 |          |   |
| 19 | 21334829 | 21345305 | 4654‡               | 1 |          |   |
| 19 | 21412131 | 21418811 | 4655‡               | 1 |          |   |
| 19 | 21430787 | 21441082 | 4656‡               | 1 |          |   |
| 19 | 21602971 | 21612442 | 4658‡               | 1 |          |   |
| 19 | 21620237 | 21631408 | 4657‡               | 1 | W-139†   | 4 |
| 19 | 21666568 | 21673402 | 4659‡               | 1 |          |   |
| 19 | 21783749 | 21794807 | 4662‡               | 1 |          |   |

|    |          |          |          |   |                              |     |
|----|----------|----------|----------|---|------------------------------|-----|
| 19 | 21858175 | 21867391 | 4664‡    | 1 |                              |     |
| 19 | 21880628 | 21890401 | 4663‡    | 1 |                              |     |
| 19 | 22193283 | 22202824 | 4665‡    | 1 |                              |     |
| 19 | 22355408 | 22362466 | 4666‡    | 1 |                              |     |
| 19 | 22484595 | 22489877 | 4668‡    | 1 |                              |     |
| 19 | 22524803 | 22531776 | 4667‡    | 1 |                              |     |
| 19 | 22568270 | 22575021 | 4670‡    | 1 |                              |     |
| 19 | 22575531 | 22583732 | 4669‡    | 1 | K-54**, K51                  | 2,3 |
| 19 | 22747819 | 22758901 | 4673‡    | 1 | W-140†                       | 4   |
| 19 | 23025108 | 23031755 | 4674‡    | 1 |                              |     |
| 19 | 23177265 | 23186831 | 4676‡    | 1 |                              |     |
| 19 | 23340355 | 23353938 | 4678‡    | 1 |                              |     |
| 19 | 23532070 | 23540320 | 4679‡    | 1 |                              |     |
| 19 | 23552248 | 23559527 | 4680‡    | 1 |                              |     |
| 19 | 23571069 | 23580044 | 4681‡    | 1 |                              |     |
| 19 | 23816379 | 23824266 | 4682‡    | 1 |                              |     |
| 19 | 23847289 | 23857146 | 4683‡    | 1 |                              |     |
| 19 | 23864819 | 23872406 | 4684‡    | 1 |                              |     |
| 19 | 23883274 | 23888705 | 4685‡    | 1 |                              |     |
| 19 | 23947082 | 23948150 | W-141†   | 4 |                              |     |
| 19 | 24243249 | 24251697 | 4688‡    | 1 |                              |     |
| 19 | 24321213 | 24325852 | 4687‡    | 1 |                              |     |
| 19 | 27580525 | 27588528 | 4694‡    | 1 |                              |     |
| 19 | 27637114 | 27646451 | 4695‡    | 1 | HERVK-28,<br>K(C19), ERVK-19 | 2,3 |
| 19 | 27709358 | 27711773 | 4697‡    | 1 |                              |     |
| 19 | 27745647 | 27751364 | 4696‡    | 1 |                              |     |
| 19 | 28427792 | 28437238 | 4699‡    | 1 |                              |     |
| 19 | 28606515 | 28615314 | 4700‡    | 1 |                              |     |
| 19 | 34552600 | 34561349 | 4707‡    | 1 |                              |     |
| 19 | 34722067 | 34727461 | 4710‡    | 1 |                              |     |
| 19 | 35359912 | 35373068 | 4711‡    | 1 |                              |     |
| 19 | 35572304 | 35576532 | K-57**   | 2 | K(19q13.12b)                 | 3   |
| 19 | 36149712 | 36161023 | 4713‡    | 1 |                              |     |
| 19 | 36255756 | 36265235 | 4714‡    | 1 | ERVH 19q13.12                | 5   |
| 19 | 36323748 | 36332422 | 4715‡    | 1 |                              |     |
| 19 | 37106647 | 37116164 | HERVK-29 | 2 | K(OLDAC012309),<br>KOLD12309 | 3   |
| 19 | 38751881 | 38766542 | 4719‡    | 1 |                              |     |
| 19 | 38823108 | 38837433 | 4720‡    | 1 |                              |     |
| 19 | 38935164 | 38941835 | 4721‡    | 1 |                              |     |
| 19 | 40071940 | 40072654 | W-142†   | 4 |                              |     |
| 19 | 40954161 | 40959664 | 4728‡    | 1 |                              |     |
| 19 | 40986242 | 40988149 | W-61†    | 4 |                              |     |
| 19 | 42446147 | 42453306 | 4731‡    | 1 |                              |     |
| 19 | 43286141 | 43301261 | 4734‡    | 1 |                              |     |
| 19 | 43308368 | 43317327 | 4735‡    | 1 |                              |     |
| 19 | 43321084 | 43329393 | 4736‡    | 1 | ERVH 19q13.31**              | 5   |
| 19 | 44633161 | 44635337 | 4739‡    | 1 |                              |     |
| 19 | 46102562 | 46109933 | 4741‡    | 1 |                              |     |
| 19 | 46273163 | 46278852 | 4742‡    | 1 |                              |     |
| 19 | 47047398 | 47055397 | 4744‡    | 1 | ERVH 19q13.32                | 5   |
| 19 | 47392829 | 47398771 | 4745‡    | 1 |                              |     |

|    |          |          |          |   |                        |     |
|----|----------|----------|----------|---|------------------------|-----|
| 19 | 50347458 | 50350184 | 4752‡    | 1 |                        |     |
| 19 | 51302957 | 51308214 | 4754‡    | 1 |                        |     |
| 19 | 51396764 | 51402961 | 4755‡    | 1 |                        |     |
| 19 | 51804688 | 51811880 | 4757‡    | 1 | ERVK3-6                | 6   |
| 19 | 51976955 | 51992228 | 4758‡    | 1 |                        |     |
| 19 | 52300607 | 52307977 | 4760‡    | 1 |                        |     |
| 19 | 52408081 | 52414733 | 4763‡    | 1 |                        |     |
| 19 | 52460889 | 52466346 | 4762‡    | 1 |                        |     |
| 19 | 52472461 | 52485485 | 4761‡    | 1 |                        |     |
| 19 | 52620842 | 52627302 | 4765‡    | 1 |                        |     |
| 19 | 52627908 | 52636164 | 4767‡    | 1 | ERVH 19q13.41          | 5   |
| 19 | 52649616 | 52653116 | 4766‡    | 1 |                        |     |
| 19 | 52740546 | 52749825 | 4768‡    | 1 | K-58**,<br>K(22q11.23) | 2,3 |
| 19 | 52751426 | 52755047 | 4769‡    | 1 |                        |     |
| 19 | 52898515 | 52905434 | 4770‡    | 1 |                        |     |
| 19 | 52956502 | 52960553 | 4772‡    | 1 |                        |     |
| 19 | 52984944 | 52989463 | 4771‡    | 1 |                        |     |
| 19 | 53007512 | 53013180 | ERVFRD-2 | 6 |                        |     |
| 19 | 53014331 | 53016580 | ERVV-1   | 6 |                        |     |
| 19 | 53044738 | 53051127 | ERVV-2   | 6 |                        |     |
| 19 | 53359490 | 53365214 | 4776‡    | 1 | K-73**, LTR13          | 2,3 |
| 19 | 53433375 | 53443110 | 4778‡    | 1 |                        |     |
| 19 | 53469501 | 53482212 | 4777‡    | 1 |                        |     |
| 19 | 53831404 | 53845084 | 4779‡    | 1 |                        |     |
| 19 | 54761612 | 54778649 | 4780‡    | 1 |                        |     |
| 19 | 54894291 | 54900597 | 4783‡    | 1 |                        |     |
| 19 | 55006828 | 55012423 | 4784‡    | 1 |                        |     |
| 19 | 55122249 | 55128004 | 4785‡    | 1 |                        |     |
| 19 | 56494762 | 56501703 | 4787‡    | 1 |                        |     |
| 19 | 57487177 | 57500813 | 4790‡    | 1 |                        |     |
| 19 | 57513039 | 57518511 | 4791‡    | 1 |                        |     |
| 19 | 57652607 | 57656643 | 4792‡    | 1 |                        |     |
| 19 | 57896518 | 57903857 | 4795‡    | 1 |                        |     |
| 19 | 58305377 | 58315652 | ERVK3-1  | 6 |                        |     |
| 20 | 172502   | 179937   | 4798‡    | 1 |                        |     |
| 20 | 191330   | 194116   | 4797‡    | 1 |                        |     |
| 20 | 468633   | 472902   | 4800‡    | 1 |                        |     |
| 20 | 791798   | 800945   | 4801‡    | 1 |                        |     |
| 20 | 897124   | 903148   | 4803‡    | 1 |                        |     |
| 20 | 1396938  | 1407244  | 4804‡    | 1 |                        |     |
| 20 | 1728521  | 1733344  | 4806‡    | 1 |                        |     |
| 20 | 4520500  | 4529369  | 4807‡    | 1 |                        |     |
| 20 | 5304696  | 5307873  | 4809‡    | 1 |                        |     |
| 20 | 12338021 | 12346131 | 4812‡    | 1 | ERVH 20p12.1**         | 5   |
| 20 | 12754140 | 12764427 | 4813‡    | 1 |                        |     |
| 20 | 13357880 | 13365558 | 4815‡    | 1 |                        |     |
| 20 | 15147682 | 15153521 | 4817‡    | 1 |                        |     |
| 20 | 15980070 | 15986191 | 4818‡    | 1 |                        |     |
| 20 | 16834846 | 16846370 | 4820‡    | 1 |                        |     |
| 20 | 18518036 | 18522594 | 4821‡    | 1 |                        |     |
| 20 | 19752022 | 19756780 | 4825‡    | 1 |                        |     |
| 20 | 23468003 | 23476241 | 4827‡    | 1 |                        |     |

|    |          |          |        |   |                                         |     |
|----|----------|----------|--------|---|-----------------------------------------|-----|
| 20 | 23735863 | 23742762 | 4828‡  | 1 |                                         |     |
| 20 | 24919442 | 24933027 | 4830‡  | 1 |                                         |     |
| 20 | 25394211 | 25403221 | 4832‡  | 1 | ERVK3-8                                 | 6   |
| 20 | 34126943 | 34136578 | K-46** | 2 | K(OLDAL136419),<br>K59                  | 3   |
| 20 | 38592399 | 38598803 | 4834‡  | 1 |                                         |     |
| 20 | 39721012 | 39727464 | 4837‡  | 1 |                                         |     |
| 20 | 40093103 | 40099044 | 4838‡  | 1 |                                         |     |
| 20 | 40269047 | 40275815 | 4839‡  | 1 |                                         |     |
| 20 | 41594586 | 41602330 | 4841‡  | 1 |                                         |     |
| 20 | 41684924 | 41695822 | 4842‡  | 1 |                                         |     |
| 20 | 44670229 | 44679205 | 4843‡  | 1 |                                         |     |
| 20 | 45582673 | 45588585 | 4846‡  | 1 |                                         |     |
| 20 | 45759320 | 45766498 | 4847‡  | 1 |                                         |     |
| 20 | 49281128 | 49287343 | 4849‡  | 1 |                                         |     |
| 20 | 55027273 | 55036809 | 4851‡  | 1 |                                         |     |
| 20 | 55347330 | 55353160 | 4852‡  | 1 | W-143†                                  | 4   |
| 21 | 9146098  | 9153400  | 4855‡  | 1 |                                         |     |
| 21 | 9301439  | 9305774  | 4856‡  | 1 |                                         |     |
| 21 | 13051901 | 13060395 | 4858‡  | 1 |                                         |     |
| 21 | 13889758 | 13900479 | 4861‡  | 1 |                                         |     |
| 21 | 14115154 | 14124623 | 4862‡  | 1 |                                         |     |
| 21 | 15979608 | 15985359 | 4864‡  | 1 |                                         |     |
| 21 | 16391943 | 16397915 | 4865‡  | 1 |                                         |     |
| 21 | 16892210 | 16898242 | 4866‡  | 1 |                                         |     |
| 21 | 16914121 | 16919914 | 4867‡  | 1 |                                         |     |
| 21 | 17121596 | 17129944 | 4868‡  | 1 |                                         |     |
| 21 | 17172736 | 17190412 | 4869‡  | 1 |                                         |     |
| 21 | 17297248 | 17306839 | 4870‡  | 1 |                                         |     |
| 21 | 18561004 | 18570006 | 4873‡  | 1 | K-23**,<br>K60, ERVK-23                 | 2,3 |
| 21 | 18752743 | 18760548 | W-62†  | 4 |                                         |     |
| 21 | 23962251 | 23969232 | 4878‡  | 1 |                                         |     |
| 21 | 26227877 | 26233487 | 4881‡  | 1 |                                         |     |
| 21 | 26854425 | 26862444 | 4882‡  | 1 | W-144†                                  | 4   |
| 21 | 27721835 | 27727634 | 4884‡  | 1 |                                         |     |
| 21 | 28161729 | 28167804 | 4885‡  | 1 |                                         |     |
| 21 | 28301127 | 28307279 | 4886‡  | 1 |                                         |     |
| 21 | 32660559 | 32664759 | 4890‡  | 1 |                                         |     |
| 21 | 36104268 | 36109979 | 4894‡  | 1 |                                         |     |
| 21 | 37583711 | 37592312 | 4895‡  | 1 |                                         |     |
| 21 | 38224031 | 38229830 | 4896‡  | 1 |                                         |     |
| 21 | 39739263 | 39746425 | W-63†  | 4 |                                         |     |
| 21 | 40954514 | 40960209 | 4902‡  | 1 |                                         |     |
| 21 | 42800846 | 42806578 | 4905‡  | 1 |                                         |     |
| 21 | 42916753 | 42925759 | 4906‡  | 1 | ERVH48-1                                | 6   |
| 22 | 15280410 | 15291546 | 6261‡  | 1 |                                         |     |
| 22 | 16611312 | 16616782 | 6262‡  | 1 | ERVH 22q11.1<br>K101,K(C22),<br>ERVK-24 | 5   |
| 22 | 18938673 | 18947848 | K-14** | 2 |                                         | 3   |
| 22 | 19936446 | 19938701 | 6265‡  | 1 |                                         |     |
| 22 | 22452716 | 22459455 | 6268‡  | 1 |                                         |     |

|    |          |          |        |   |                            |   |
|----|----------|----------|--------|---|----------------------------|---|
| 22 | 23538316 | 23548383 | 6272‡  | 1 | KOLD345,<br>K(OLDAP000345) | 3 |
| 22 | 30676788 | 30679926 | 6275‡  | 1 |                            |   |
| 22 | 32502707 | 32510981 | 6277‡  | 1 |                            |   |
| 22 | 33949541 | 33949999 | W-64†  | 4 |                            |   |
| 22 | 34504724 | 34510781 | 6279‡  | 1 |                            |   |
| 22 | 34834608 | 34840026 | 6281‡  | 1 |                            |   |
| 22 | 39052278 | 39066270 | 6283‡  | 1 |                            |   |
| 22 | 42104461 | 42115918 | 6285‡  | 1 |                            |   |
| X  | 3553143  | 3560161  | 5287‡  | 1 |                            |   |
| X  | 3966195  | 3976187  | 5288‡  | 1 |                            |   |
| X  | 4540123  | 4546198  | 5290‡  | 1 | ERVH Xp22.32               | 5 |
| X  | 4891614  | 4900090  | 5292‡  | 1 |                            |   |
| X  | 6272219  | 6277943  | 5294‡  | 1 |                            |   |
| X  | 7697265  | 7702662  | 5297‡  | 1 | W-65†                      | 4 |
| X  | 7974855  | 7979912  | 5298‡  | 1 |                            |   |
| X  | 12939865 | 12947330 | 5302‡  | 1 |                            |   |
| X  | 16038040 | 16051365 | 5304‡  | 1 |                            |   |
| X  | 16175752 | 16184467 | 5305‡  | 1 |                            |   |
| X  | 16216873 | 16222271 | 5306‡  | 1 |                            |   |
| X  | 25894071 | 25900271 | 5316‡  | 1 |                            |   |
| X  | 26499201 | 26502798 | 5318‡  | 1 |                            |   |
| X  | 27286262 | 27294955 | 5320‡  | 1 |                            |   |
| X  | 28500450 | 28509315 | 5327‡  | 1 |                            |   |
| X  | 28891450 | 28898193 | 5329‡  | 1 |                            |   |
| X  | 29975702 | 29981243 | 5330‡  | 1 |                            |   |
| X  | 30103769 | 30110574 | 5331‡  | 1 |                            |   |
| X  | 30441927 | 30456988 | 5332‡  | 1 |                            |   |
| X  | 31377722 | 31383372 | 5334‡  | 1 |                            |   |
| X  | 33911710 | 33914268 | 5335‡  | 1 |                            |   |
| X  | 34087950 | 34094215 | 5337‡  | 1 |                            |   |
| X  | 34796308 | 34803308 | 5339‡  | 1 |                            |   |
| X  | 34978537 | 34992322 | 5340‡  | 1 |                            |   |
| X  | 35608657 | 35618305 | 5343‡  | 1 |                            |   |
| X  | 37451928 | 37461065 | 5346‡  | 1 |                            |   |
| X  | 37465409 | 37473413 | 5344‡  | 1 |                            |   |
| X  | 37478342 | 37484837 | 5345‡  | 1 |                            |   |
| X  | 40793646 | 40806487 | 5348‡  | 1 |                            |   |
| X  | 42762320 | 42770975 | 5350‡  | 1 |                            |   |
| X  | 44999286 | 45006625 | 5352‡  | 1 |                            |   |
| X  | 45202388 | 45213066 | 5353‡  | 1 |                            |   |
| X  | 46186894 | 46189578 | W-145† | 4 |                            |   |
| X  | 46478654 | 46490494 | 5356‡  | 1 |                            |   |
| X  | 47285391 | 47294133 | 5357‡  | 1 |                            |   |
| X  | 47700466 | 47707098 | 5358‡  | 1 |                            |   |
| X  | 47866275 | 47875865 | 5359‡  | 1 |                            |   |
| X  | 48853817 | 48861808 | 5360‡  | 1 |                            |   |
| X  | 49139779 | 49148918 | 5361‡  | 1 |                            |   |
| X  | 49307957 | 49316498 | 5363‡  | 1 |                            |   |
| X  | 49529170 | 49539011 | 5367‡  | 1 |                            |   |
| X  | 50330000 | 50338533 | 5371‡  | 1 |                            |   |
| X  | 52467459 | 52479123 | 5380‡  | 1 |                            |   |
| X  | 52568174 | 52578848 | 5383‡  | 1 |                            |   |

|   |          |          |       |   |                   |     |
|---|----------|----------|-------|---|-------------------|-----|
| X | 53160069 | 53162218 | 5387‡ | 1 |                   |     |
| X | 53512948 | 53520776 | 5388‡ | 1 |                   |     |
| X | 56024197 | 56032063 | 5397‡ | 1 |                   |     |
| X | 56938094 | 56949398 | 5404‡ | 1 |                   |     |
| X | 57102981 | 57109396 | 5407‡ | 1 |                   |     |
| X | 57204834 | 57209137 | 5409‡ | 1 |                   |     |
| X | 57219330 | 57223949 | 5410‡ | 1 |                   |     |
| X | 57398558 | 57405610 | W-66† | 4 |                   |     |
| X | 57769177 | 57779484 | 5415‡ | 1 |                   |     |
| X | 62708305 | 62717099 | 5421‡ | 1 |                   |     |
| X | 62740126 | 62747923 | 5423‡ | 1 | K-71**, K(Xq11.1) | 2,3 |
| X | 62752860 | 62758999 | 5422‡ | 1 |                   |     |
| X | 63082379 | 63089126 | 5424‡ | 1 |                   |     |
| X | 63272569 | 63282655 | 5426‡ | 1 |                   |     |
| X | 63317608 | 63327790 | 5428‡ | 1 |                   |     |
| X | 63358010 | 63364629 | 5427‡ | 1 |                   |     |
| X | 63409349 | 63416708 | 5430‡ | 1 |                   |     |
| X | 63426518 | 63434693 | 5429‡ | 1 |                   |     |
| X | 64616777 | 64633443 | 5438‡ | 1 |                   |     |
| X | 64647409 | 64663902 | 5437‡ | 1 |                   |     |
| X | 64781085 | 64789474 | 5439‡ | 1 |                   |     |
| X | 64842539 | 64850853 | 5440‡ | 1 |                   |     |
| X | 65130175 | 65134926 | 5442‡ | 1 |                   |     |
| X | 65361890 | 65365179 | 5445‡ | 1 |                   |     |
| X | 65437711 | 65442396 | 5446‡ | 1 |                   |     |
| X | 65927365 | 65932801 | 5447‡ | 1 |                   |     |
| X | 66218551 | 66226258 | 5448‡ | 1 |                   |     |
| X | 66460972 | 66470510 | 5449‡ | 1 | K-40**, K(Xq12)   | 2,3 |
| X | 66534175 | 66542082 | 5450‡ | 1 |                   |     |
| X | 69697028 | 69703830 | 5459‡ | 1 |                   |     |
| X | 71264576 | 71272620 | 5463‡ | 1 |                   |     |
| X | 71497988 | 71500132 | 5464‡ | 1 |                   |     |
| X | 71696822 | 71703196 | 5465‡ | 1 |                   |     |
| X | 71778379 | 71784752 | 5466‡ | 1 |                   |     |
| X | 72220511 | 72230614 | 5469‡ | 1 |                   |     |
| X | 73042987 | 73051205 | 5472‡ | 1 |                   |     |
| X | 73255958 | 73264800 | 5473‡ | 1 |                   |     |
| X | 73313187 | 73325436 | 5474‡ | 1 |                   |     |
| X | 73527958 | 73536417 | 5476‡ | 1 |                   |     |
| X | 73655975 | 73666201 | 5477‡ | 1 |                   |     |
| X | 73801458 | 73809385 | 5479‡ | 1 |                   |     |
| X | 74121599 | 74130555 | 5480‡ | 1 |                   |     |
| X | 74168249 | 74182990 | 5481‡ | 1 |                   |     |
| X | 74302030 | 74311151 | 5484‡ | 1 |                   |     |
| X | 75171788 | 75179180 | 5488‡ | 1 |                   |     |
| X | 75205622 | 75210629 | 5489‡ | 1 |                   |     |
| X | 75631567 | 75637470 | 5493‡ | 1 |                   |     |
| X | 75642664 | 75649367 | 5494‡ | 1 |                   |     |
| X | 75893366 | 75902974 | 5499‡ | 1 | W-67†             | 4   |
| X | 75961465 | 75969399 | 5498‡ | 1 |                   |     |
| X | 76796483 | 76803119 | 5506‡ | 1 |                   |     |
| X | 77077095 | 77086082 | 5508‡ | 1 |                   |     |
| X | 77121744 | 77128476 | 5509‡ | 1 |                   |     |



|   |           |           |        |   |          |    |
|---|-----------|-----------|--------|---|----------|----|
| X | 77293724  | 77302400  | 5510‡  | 1 |          |    |
| X | 78214664  | 78217277  | 5511‡  | 1 |          |    |
| X | 79721250  | 79727310  | 5516‡  | 1 |          |    |
| X | 79813667  | 79828748  | 5518‡  | 1 |          |    |
| X | 79955890  | 79963094  | W-146† | 4 |          |    |
| X | 80041181  | 80046335  | 5520‡  | 1 |          |    |
| X | 80312121  | 80317995  | 5523‡  | 1 |          |    |
| X | 80423696  | 80433182  | 5524‡  | 1 |          |    |
| X | 80477182  | 80482555  | 5525‡  | 1 |          |    |
| X | 81867751  | 81875183  | 5531‡  | 1 |          |    |
| X | 82364110  | 82371122  | 5535‡  | 1 |          |    |
| X | 82726766  | 82732949  | 5537‡  | 1 |          |    |
| X | 82925823  | 82931395  | 5539‡  | 1 |          |    |
| X | 83007869  | 83015796  | 5540‡  | 1 |          |    |
| X | 83171625  | 83178944  | 5542‡  | 1 |          |    |
| X | 84001689  | 84015772  | 5546‡  | 1 |          |    |
| X | 84695542  | 84709707  | 5550‡  | 1 |          |    |
| X | 84738500  | 84745112  | 5549‡  | 1 |          |    |
| X | 84945046  | 84954657  | 5553‡  | 1 |          |    |
| X | 85811990  | 85819969  | 5558‡  | 1 |          |    |
| X | 86981844  | 86987484  | 5560‡  | 1 |          |    |
| X | 87349072  | 87356064  | 5562‡  | 1 |          |    |
| X | 87681666  | 87687660  | 5563‡  | 1 |          |    |
| X | 88842022  | 88848429  | 5565‡  | 1 |          |    |
| X | 89576273  | 89586576  | 5568‡  | 1 |          |    |
| X | 89752637  | 89763881  | 5570‡  | 1 |          |    |
| X | 89986853  | 89994915  | 5571‡  | 1 |          |    |
| X | 90215809  | 90223569  | 5572‡  | 1 |          |    |
| X | 90273940  | 90281241  | 5573‡  | 1 |          |    |
| X | 90690834  | 90706480  | 5574‡  | 1 |          |    |
| X | 90773019  | 90780037  | 5575‡  | 1 |          |    |
| X | 92096287  | 92105674  | 5579‡  | 1 |          |    |
| X | 92273084  | 92278794  | 5580‡  | 1 |          |    |
| X | 92727353  | 92733889  | 5582‡  | 1 |          |    |
| X | 92824428  | 92829347  | 5583‡  | 1 |          |    |
| X | 93020729  | 93028188  | 5584‡  | 1 |          |    |
| X | 93429942  | 93438419  | 5585‡  | 1 |          |    |
| X | 93958010  | 93965513  | 5588‡  | 1 |          |    |
| X | 94010051  | 94018833  | 5587‡  | 1 |          |    |
| X | 94489391  | 94498446  | 5590‡  | 1 |          |    |
| X | 94697887  | 94705089  | 5591‡  | 1 |          |    |
| X | 95071931  | 95079861  | 5594‡  | 1 |          |    |
| X | 95101567  | 95108539  | 5593‡  | 1 |          |    |
| X | 95959064  | 95965922  | 5597‡  | 1 |          |    |
| X | 96624140  | 96630445  | 5599‡  | 1 |          |    |
| X | 97841728  | 97849389  | 5600‡  | 1 | envF(c)1 | 43 |
| X | 98524253  | 98530086  | 5603‡  | 1 |          |    |
| X | 98855574  | 98865190  | 5605‡  | 1 |          |    |
| X | 99159896  | 99164782  | 5606‡  | 1 |          |    |
| X | 100567830 | 100576903 | 5610‡  | 1 |          |    |
| X | 100790217 | 100799630 | 5611‡  | 1 |          |    |
| X | 101179161 | 101189874 | 5614‡  | 1 |          |    |
| X | 102175186 | 102181663 | 5616‡  | 1 |          |    |

|   |           |           |              |   |        |   |
|---|-----------|-----------|--------------|---|--------|---|
| X | 103426129 | 103435991 | 5618‡        | 1 |        |   |
| X | 103762322 | 103765692 | 5620‡        | 1 |        |   |
| X | 104882835 | 104897050 | 5624‡        | 1 |        |   |
| X | 105997294 | 106009106 | 5626‡        | 1 | W-147† | 4 |
| X | 106181083 | 106186881 | 5628‡        | 1 |        |   |
| X | 107052130 | 107054871 | ERVW-2-2013* | 4 |        |   |
| X | 107871428 | 107879722 | 5632‡        | 1 |        |   |
| X | 108139441 | 108148433 | 5633‡        | 1 |        |   |
| X | 108478583 | 108483610 | 5634‡        | 1 |        |   |
| X | 109178345 | 109184159 | 5636‡        | 1 |        |   |
| X | 109304083 | 109311765 | 5637‡        | 1 |        |   |
| X | 109866294 | 109870869 | 5639‡        | 1 |        |   |
| X | 111543760 | 111549689 | 5641‡        | 1 |        |   |
| X | 111670290 | 111675965 | 5642‡        | 1 |        |   |
| X | 112109265 | 112116706 | 5643‡        | 1 |        |   |
| X | 112530344 | 112536767 | 5644‡        | 1 |        |   |
| X | 113104771 | 113114951 | 5645‡        | 1 |        |   |
| X | 113173584 | 113183700 | 5646‡        | 1 |        |   |
| X | 114040288 | 114044811 | 5651‡        | 1 |        |   |
| X | 114466825 | 114476746 | 5652‡        | 1 |        |   |
| X | 114602201 | 114606789 | 5654‡        | 1 |        |   |
| X | 115498930 | 115509584 | 5656‡        | 1 |        |   |
| X | 115537908 | 115545511 | 5657‡        | 1 |        |   |
| X | 115916677 | 115924097 | 5658‡        | 1 |        |   |
| X | 116010785 | 116013779 | 5660‡        | 1 |        |   |
| X | 116036388 | 116040966 | 5659‡        | 1 |        |   |
| X | 116243545 | 116251158 | 5663‡        | 1 |        |   |
| X | 116284636 | 116293721 | 5665‡        | 1 |        |   |
| X | 116330409 | 116341460 | 5664‡        | 1 |        |   |
| X | 116720317 | 116726712 | ERVH Xq23    | 5 |        |   |
| X | 116733928 | 116742765 | 5667‡        | 1 |        |   |
| X | 116812451 | 116817998 | 5668‡        | 1 |        |   |
| X | 117068618 | 117079406 | 5669‡        | 1 |        |   |
| X | 117279303 | 117285797 | 5671‡        | 1 |        |   |
| X | 117416255 | 117422915 | 5672‡        | 1 |        |   |
| X | 118293077 | 118300607 | 5675‡        | 1 |        |   |
| X | 118884537 | 118892284 | 5676‡        | 1 |        |   |
| X | 119318691 | 119324645 | 5678‡        | 1 |        |   |
| X | 120146456 | 120156069 | 5680‡        | 1 |        |   |
| X | 121343883 | 121348564 | 5682‡        | 1 |        |   |
| X | 122222004 | 122229858 | 5686‡        | 1 |        |   |
| X | 123131077 | 123135699 | 5688‡        | 1 |        |   |
| X | 125386852 | 125394562 | 5691‡        | 1 |        |   |
| X | 125432034 | 125440433 | 5690‡        | 1 |        |   |
| X | 126862547 | 126870659 | 5696‡        | 1 |        |   |
| X | 127396754 | 127403977 | 5699‡        | 1 |        |   |
| X | 130278616 | 130286736 | 5703‡        | 1 |        |   |
| X | 131712222 | 131717768 | 5705‡        | 1 |        |   |
| X | 131925908 | 131933350 | 5709‡        | 1 |        |   |
| X | 135058836 | 135069250 | 5711‡        | 1 |        |   |
| X | 135650859 | 135657414 | 5713‡        | 1 |        |   |
| X | 136923426 | 136936654 | 5717‡        | 1 |        |   |
| X | 138260657 | 138270022 | 5718‡        | 1 |        |   |

|   |           |           |        |   |                 |     |
|---|-----------|-----------|--------|---|-----------------|-----|
| X | 140077595 | 140080821 | W-148† | 4 |                 |     |
| X | 141192905 | 141198567 | 5723‡  | 1 |                 |     |
| X | 142164535 | 142177397 | 5727‡  | 1 |                 |     |
| X | 142180634 | 142190582 | 5728‡  | 1 |                 |     |
| X | 142227596 | 142231848 | 5730‡  | 1 |                 |     |
| X | 142265202 | 142273780 | 5729‡  | 1 |                 |     |
| X | 142423016 | 142428961 | 5732‡  | 1 |                 |     |
| X | 142915951 | 142922545 | 5735‡  | 1 |                 |     |
| X | 143028198 | 143032421 | 5736‡  | 1 |                 |     |
| X | 143509893 | 143515017 | 5738‡  | 1 |                 |     |
| X | 143713137 | 143718293 | 5740‡  | 1 |                 |     |
| X | 144740283 | 144745188 | 5743‡  | 1 |                 |     |
| X | 145968820 | 145978251 | 5747‡  | 1 |                 |     |
| X | 149073592 | 149080259 | 5754‡  | 1 |                 |     |
| X | 149315647 | 149325315 | 5755‡  | 1 |                 |     |
| X | 149676061 | 149681404 | 5759‡  | 1 |                 |     |
| X | 149720224 | 149727671 | 5761‡  | 1 |                 |     |
| X | 151550924 | 151562615 | 5763‡  | 1 |                 |     |
| X | 153094556 | 153101486 | 5766‡  | 1 |                 |     |
| X | 154589363 | 154594514 | 5768‡  | 1 | K-65**, K63     | 2,3 |
| X | 154608422 | 154615762 | K-64** | 2 | K63             | 3   |
| X | 155969058 | 155977429 | 5771‡  | 1 |                 |     |
| Y | 3235167   | 3243049   | 5021‡  | 1 |                 |     |
| Y | 3404861   | 3410937   | 5022‡  | 1 |                 |     |
| Y | 3784913   | 3792670   | 5023‡  | 1 |                 |     |
| Y | 3850270   | 3860082   | 5024‡  | 1 |                 |     |
| Y | 4208258   | 4214762   | 5027‡  | 1 |                 |     |
| Y | 4272996   | 4288630   | 5028‡  | 1 |                 |     |
| Y | 4355097   | 4361163   | 5029‡  | 1 |                 |     |
| Y | 5322055   | 5330427   | 5031‡  | 1 |                 |     |
| Y | 5941111   | 5949442   | 5035‡  | 1 |                 |     |
| Y | 6136990   | 6144447   | 5036‡  | 1 |                 |     |
| Y | 6384079   | 6396391   | 5038‡  | 1 |                 |     |
| Y | 6958031   | 6965791   | 5042‡  | 1 | K-70**, K(1q43) | 2,3 |
| Y | 7170020   | 7177765   | 5045‡  | 1 |                 |     |
| Y | 7177779   | 7184177   | 5044‡  | 1 |                 |     |
| Y | 7190520   | 7206231   | 5043‡  | 1 |                 |     |
| Y | 7377455   | 7388167   | 5047‡  | 1 |                 |     |
| Y | 7392326   | 7401043   | 5046‡  | 1 |                 |     |
| Y | 7500590   | 7509604   | 5048‡  | 1 |                 |     |
| Y | 7621160   | 7627771   | 5049‡  | 1 |                 |     |
| Y | 7830919   | 7841079   | 5050‡  | 1 |                 |     |
| Y | 7885587   | 7889513   | 5052‡  | 1 |                 |     |
| Y | 7952891   | 7961796   | 5053‡  | 1 |                 |     |
| Y | 7992952   | 7995712   | 5054‡  | 1 |                 |     |
| Y | 8187181   | 8203418   | 5056‡  | 1 |                 |     |
| Y | 8204847   | 8212441   | 5055‡  | 1 |                 |     |
| Y | 8533627   | 8546755   | 5057‡  | 1 |                 |     |
| Y | 8644060   | 8655343   | 5062‡  | 1 |                 |     |
| Y | 8803183   | 8811720   | 5064‡  | 1 |                 |     |
| Y | 8862745   | 8871211   | 5066‡  | 1 |                 |     |
| Y | 8979988   | 8988904   | 5067‡  | 1 |                 |     |
| Y | 8994260   | 9004253   | 5068‡  | 1 |                 |     |

|   |          |          |       |   |  |  |
|---|----------|----------|-------|---|--|--|
| Y | 9145264  | 9151327  | 5070‡ | 1 |  |  |
| Y | 9212120  | 9215355  | 5072‡ | 1 |  |  |
| Y | 9238213  | 9243145  | 5073‡ | 1 |  |  |
| Y | 9265424  | 9277683  | 5075‡ | 1 |  |  |
| Y | 9277819  | 9289319  | 5074‡ | 1 |  |  |
| Y | 9770205  | 9780152  | 5078‡ | 1 |  |  |
| Y | 9974873  | 9979031  | 5080‡ | 1 |  |  |
| Y | 10047183 | 10053560 | 5081‡ | 1 |  |  |
| Y | 11236344 | 11238633 | 5082‡ | 1 |  |  |
| Y | 11888488 | 11896674 | 5088‡ | 1 |  |  |
| Y | 12146854 | 12153785 | 5089‡ | 1 |  |  |
| Y | 12243112 | 12251532 | 5091‡ | 1 |  |  |
| Y | 12256409 | 12266869 | 5092‡ | 1 |  |  |
| Y | 12282379 | 12287681 | 5090‡ | 1 |  |  |
| Y | 12311706 | 12321125 | 5093‡ | 1 |  |  |
| Y | 12323295 | 12328478 | 5095‡ | 1 |  |  |
| Y | 12355053 | 12358537 | 5094‡ | 1 |  |  |
| Y | 12465499 | 12478126 | 5096‡ | 1 |  |  |
| Y | 12559210 | 12565355 | 5097‡ | 1 |  |  |
| Y | 12593587 | 12599119 | 5098‡ | 1 |  |  |
| Y | 12599792 | 12608723 | 5099‡ | 1 |  |  |
| Y | 12891505 | 12898460 | 5101‡ | 1 |  |  |
| Y | 12953369 | 12964165 | 5103‡ | 1 |  |  |
| Y | 12993872 | 13001276 | 5104‡ | 1 |  |  |
| Y | 13111299 | 13122310 | 5106‡ | 1 |  |  |
| Y | 13169765 | 13175843 | 5105‡ | 1 |  |  |
| Y | 13252527 | 13259365 | 5107‡ | 1 |  |  |
| Y | 13282562 | 13289605 | 5108‡ | 1 |  |  |
| Y | 13339217 | 13346091 | 5109‡ | 1 |  |  |
| Y | 13435167 | 13443256 | 5110‡ | 1 |  |  |
| Y | 13611120 | 13619753 | 5111‡ | 1 |  |  |
| Y | 13627526 | 13637279 | 5113‡ | 1 |  |  |
| Y | 13656973 | 13666134 | 5112‡ | 1 |  |  |
| Y | 13888666 | 13897893 | 5115‡ | 1 |  |  |
| Y | 14158424 | 14167796 | 5116‡ | 1 |  |  |
| Y | 14348772 | 14355178 | 5119‡ | 1 |  |  |
| Y | 14355587 | 14360319 | 5118‡ | 1 |  |  |
| Y | 14372121 | 14381876 | 5117‡ | 1 |  |  |
| Y | 14508053 | 14511589 | 5120‡ | 1 |  |  |
| Y | 14588806 | 14597503 | 5122‡ | 1 |  |  |
| Y | 14815796 | 14819688 | 5123‡ | 1 |  |  |
| Y | 14859160 | 14873319 | 5124‡ | 1 |  |  |
| Y | 15261734 | 15272180 | 5130‡ | 1 |  |  |
| Y | 15386509 | 15393758 | 5131‡ | 1 |  |  |
| Y | 15400315 | 15405096 | 5134‡ | 1 |  |  |
| Y | 15512244 | 15518194 | 5135‡ | 1 |  |  |
| Y | 15973451 | 15982240 | 5137‡ | 1 |  |  |
| Y | 16071124 | 16080594 | 5138‡ | 1 |  |  |
| Y | 16164234 | 16173013 | 5140‡ | 1 |  |  |
| Y | 16200407 | 16205888 | 5142‡ | 1 |  |  |
| Y | 16379455 | 16384936 | 5143‡ | 1 |  |  |
| Y | 16412335 | 16421112 | 5144‡ | 1 |  |  |
| Y | 16636327 | 16644758 | 5145‡ | 1 |  |  |

|   |          |          |        |   |        |   |
|---|----------|----------|--------|---|--------|---|
| Y | 16678632 | 16681118 | 5146‡  | 1 |        |   |
| Y | 16831453 | 16840358 | 5147‡  | 1 |        |   |
| Y | 16872134 | 16877447 | 5148‡  | 1 |        |   |
| Y | 16949880 | 16959867 | 5149‡  | 1 |        |   |
| Y | 17131134 | 17141849 | 5151‡  | 1 |        |   |
| Y | 17184055 | 17190585 | 5150‡  | 1 |        |   |
| Y | 17331863 | 17340933 | 5155‡  | 1 |        |   |
| Y | 17346329 | 17353834 | 5153‡  | 1 |        |   |
| Y | 17475288 | 17483638 | 5156‡  | 1 |        |   |
| Y | 17846848 | 17852450 | 5158‡  | 1 |        |   |
| Y | 17939551 | 17943611 | 5160‡  | 1 |        |   |
| Y | 17962367 | 17966427 | 5159‡  | 1 |        |   |
| Y | 18053561 | 18059163 | 5161‡  | 1 |        |   |
| Y | 18420050 | 18431101 | 5164‡  | 1 |        |   |
| Y | 18563554 | 18575901 | 5165‡  | 1 |        |   |
| Y | 18589481 | 18597890 | 5167‡  | 1 |        |   |
| Y | 18666656 | 18677873 | 5168‡  | 1 |        |   |
| Y | 18697819 | 18709422 | 5170‡  | 1 |        |   |
| Y | 18744502 | 18756849 | 5171‡  | 1 |        |   |
| Y | 18944747 | 18949879 | 5173‡  | 1 |        |   |
| Y | 18996635 | 19004670 | 5174‡  | 1 |        |   |
| Y | 19079937 | 19087497 | W-149† | 4 |        |   |
| Y | 19103428 | 19107197 | 5177‡  | 1 |        |   |
| Y | 19131741 | 19140776 | 5176‡  | 1 |        |   |
| Y | 19169706 | 19182559 | 5179‡  | 1 |        |   |
| Y | 19294013 | 19298672 | 5180‡  | 1 |        |   |
| Y | 19411964 | 19427725 | 5181‡  | 1 |        |   |
| Y | 19447114 | 19452512 | 5183‡  | 1 |        |   |
| Y | 19647506 | 19651863 | 5184‡  | 1 |        |   |
| Y | 19657574 | 19668204 | 5186‡  | 1 |        |   |
| Y | 19809520 | 19817871 | 5188‡  | 1 |        |   |
| Y | 19868522 | 19873642 | 5189‡  | 1 |        |   |
| Y | 19958213 | 19964023 | 5191‡  | 1 |        |   |
| Y | 20006044 | 20011624 | 5192‡  | 1 |        |   |
| Y | 20541099 | 20547636 | 5194‡  | 1 |        |   |
| Y | 20791266 | 20797790 | 5197‡  | 1 |        |   |
| Y | 20801401 | 20806104 | 5198‡  | 1 |        |   |
| Y | 20896630 | 20905731 | 5200‡  | 1 |        |   |
| Y | 21020988 | 21028812 | 5202‡  | 1 |        |   |
| Y | 21035960 | 21045092 | 5201‡  | 1 | ERVH-6 | 6 |
| Y | 21087150 | 21091916 | 5205‡  | 1 |        |   |
| Y | 21240222 | 21249982 | 5208‡  | 1 |        |   |
| Y | 21442286 | 21452372 | 5209‡  | 1 |        |   |
| Y | 21569289 | 21580008 | 5211‡  | 1 |        |   |
| Y | 21580322 | 21588356 | 5213‡  | 1 |        |   |
| Y | 21650059 | 21658343 | 5214‡  | 1 |        |   |
| Y | 21838591 | 21849781 | 5215‡  | 1 |        |   |
| Y | 21961579 | 21972508 | 5220‡  | 1 |        |   |
| Y | 21979740 | 21996269 | 5221‡  | 1 |        |   |
| Y | 22012708 | 22021565 | 5219‡  | 1 |        |   |
| Y | 22251118 | 22254964 | 5222‡  | 1 |        |   |
| Y | 22255616 | 22260281 | 5223‡  | 1 |        |   |
| Y | 22564825 | 22573682 | 5228‡  | 1 |        |   |

|   |          |          |       |   |             |   |
|---|----------|----------|-------|---|-------------|---|
| Y | 22590042 | 22606656 | 5230‡ | 1 |             |   |
| Y | 22616891 | 22626434 | 5229‡ | 1 |             |   |
| Y | 22703338 | 22709949 | 5231‡ | 1 |             |   |
| Y | 22785881 | 22795188 | 5232‡ | 1 |             |   |
| Y | 22830315 | 22835325 | 5233‡ | 1 |             |   |
| Y | 22937004 | 22944398 | 5234‡ | 1 |             |   |
| Y | 23076768 | 23083220 | 5237‡ | 1 |             |   |
| Y | 23337484 | 23343936 | 5240‡ | 1 |             |   |
| Y | 23486241 | 23492852 | 5242‡ | 1 |             |   |
| Y | 23569764 | 23578785 | 5244‡ | 1 |             |   |
| Y | 23589031 | 23605556 | 5245‡ | 1 |             |   |
| Y | 23622000 | 23630858 | 5243‡ | 1 |             |   |
| Y | 23819217 | 23826465 | 5246‡ | 1 |             |   |
| Y | 23826906 | 23832872 | 5247‡ | 1 |             |   |
| Y | 24016500 | 24022065 | 5249‡ | 1 |             |   |
| Y | 24117008 | 24121583 | 5251‡ | 1 |             |   |
| Y | 24131535 | 24136110 | 5250‡ | 1 |             |   |
| Y | 24252613 | 24255152 | 5252‡ | 1 | K(Yq11.23a) | 3 |
| Y | 24419630 | 24428938 | 5254‡ | 1 |             |   |
| Y | 24464063 | 24469073 | 5256‡ | 1 |             |   |
| Y | 24570751 | 24578156 | 5257‡ | 1 |             |   |
| Y | 24710512 | 24716964 | 5260‡ | 1 |             |   |
| Y | 24953143 | 24959595 | 5262‡ | 1 |             |   |
| Y | 25087571 | 25100204 | 5266‡ | 1 |             |   |
| Y | 25201035 | 25206045 | 5268‡ | 1 |             |   |
| Y | 25241176 | 25250484 | 5267‡ | 1 |             |   |
| Y | 25412809 | 25417531 | 5269‡ | 1 | K(Yq11.23b) | 3 |
| Y | 25534029 | 25538602 | 5270‡ | 1 |             |   |
| Y | 25548554 | 25553127 | 5271‡ | 1 |             |   |
| Y | 25648072 | 25653637 | 5272‡ | 1 |             |   |
| Y | 25837221 | 25843187 | 5273‡ | 1 |             |   |
| Y | 25843628 | 25850876 | 5274‡ | 1 |             |   |
| Y | 26025088 | 26029630 | 5277‡ | 1 |             |   |
| Y | 26039220 | 26048078 | 5276‡ | 1 |             |   |
| Y | 26064439 | 26081049 | 5279‡ | 1 |             |   |
| Y | 26177756 | 26184367 | 5280‡ | 1 |             |   |

\* Originally named in Mayer J. et al. Mobile DNA 2011, but updated in Schmitt K. et al. JVI 2013.

\*\* ERV-K loci listed in Schmitt K. et al. GBE 2013. Names were given in order annotated.

† ERV-W loci listed in Schmitt K. et al. JVI 2013. Names were given in order annotated.

‡ Numerical identifier for ERVs are the same as annotated in Vargiu L. et al. Retrovirology 2016.

## References:

1. Vargiu L, et al. (2016) Classification and characterization of human endogenous retroviruses; mosaic forms are common. *Retrovirology* 13:7.
2. Schmitt K, Reichrath J, Roesch A, Meese E, Mayer J (2013) Transcriptional profiling of human endogenous rerovirus group HERV-K(HML-2) loci in melanoma. *Genome Biol Evol* 5:307-328.
3. Subramanian RP, Wildschutte JH, Russo C, Coffin JM (2011) Identification, characterization, and comparative genomic distribution of the HERV-K (HML-2) group of human endogenous retroviruses. *Retrovirology* 8:90.

4. Schmitt K, et al. (2013) Comprehensive analysis of human endogenous retrovirus group HERV-W locus transcription in multiple sclerosis brain lesions by high-throughput amplicon sequencing. *J Virol* 87:13837-13852.
5. Liang Q, Xu Z, Xu R, Wu L, Zheng S (2012) Expression patterns of non-coding spliced transcripts from human endogenous retrovirus HERV-H elements in colon cancer. *PLoS One* 7:e29950.
6. Mayer J, Blomberg J, Seal RL (2011) A revised nomenclature for transcribed human endogenous retroviral loci *Mob DNA* 2:7.
7. Anderssen S, Sjøttem E, Svineng G, Johansen T (1997) Comparative analyses of LTRs of the ERV-H family of primate-specific retrovirus-like elements isolated from marmoset, African green monkey, and man. *Virology* 234(1):14–30.
8. Schmitt K, Heyne K, Roemer K, Meese E, Mayer J (2015) HERV-K(HML-2) rec and np9 transcripts not restricted to disease but present in many normal human tissues. *Mob DNA*. 6:4.
9. Tristem M (2000) Identification and characterization of novel human endogenous retrovirus families by phylogenetic screening of the human genome mapping project database. *J Virol* 74:3715-3730.
10. Mayer J et al. (2004) Human endogenous retrovirus HERV-K(HML-2) proviruses with Rec protein coding capacity and transcriptional activity. *Virology* 322:190-198.
